# Supplementary material for: Transcatheter aortic valve implantation versus surgical aortic valve replacement in patients with severe aortic stenosis: a systematic review and meta-analysis
Source: PubMed Central journal article supplement — BMJ Open. 2021 Dec 6;11(12):e054222. doi: 10.1136/bmjopen-2021-054222 (PMC8650468; doi:10.1136/bmjopen-2021-054222), 2021-12-06
Supplement: bmjopen-2021-054222supp001.pdf [file bmjopen-2021-054222supp001.pdf]

## **Transcatheter aortic valve implantation versus surgical aortic valve replacement in patients with severe aortic stenosis: a systematic review and meta-analysis**

Stephanie L. Swift, Ph.D, Thomas Puehler, MD, Kate Misso, MSc, Shona H. Lang, Ph.D, Carol A. Forbes, Ph.D, Jos Kleijnen, MD Ph.D, Marion Danner, Dr. rer. medic., Christian Kuhn, MD, Assad Haneya, MD Ph.D, Hatim Seoudy, MD, Jochen Cremer, MD, Norbert Frey, MD, Georg Lutter, MD Ph.D, Robert F. Wolff, MD, Fülöp Scheibler, Dr. rer. medic., Kai Wehkamp, MD, Derk Frank, MD

### **SUPPLEMENTARY MATERIAL**

- Supplementary Results
- Supplementary Tables
- Supplementary Figures
- Supplementary Appendix
- Supplementary Reference List

## Supplementary Results

### Main Analyses (Primary Outcomes)

#### *Major or Disabling stroke*

Pooled analysis suggested that the overall risk of having a major or disabling stroke was numerically decreased by 15% for TAVI compared to SAVR by 30 days following surgery (RR 0.85, 95% CI 0.56 to 1.29,  $P=0.45$ ,  $I^2$  28%; 7 studies,  $n=7,712$  patients<sup>1-7</sup>), by 20% at one year (RR 0.80, 95% CI 0.53 to 1.20,  $P=0.28$ ,  $I^2$  52%; 6 studies,  $n=7,642$  patients<sup>1-4,6,7</sup>) and by 21% at two years (RR 0.79, 95% CI 0.60 to 1.04,  $P=0.09$ ,  $I^2$  9%; 4 studies,  $n=4,665$  patients<sup>1,3,6,7</sup>); however, these differences were not statistically significant (Supplementary Figure S1).

Pooled analysis reported no evidence of a difference in the risk of major or disabling stroke at five years for TAVI compared to SAVR (RR 1.05, 95% CI 0.82 to 1.34,  $P=0.71$ ,  $I^2$  0%; 2 studies,  $n=2,782$  patients<sup>3,7</sup>) (Supplementary Figure S1). Heterogeneity was moderate at 30 days, moderate for high-risk studies at one year and moderate for intermediate-risk studies at two years.

By study risk group (defined by the criteria reported in Supplementary Table S3, which were not exclusively based on STS-PROM scores), the confidence intervals overlapped between each group at all timepoints, suggesting no significant difference in the risk of major or disabling stroke between study risk groups. Generally, the trend appeared to be towards a lower risk of major or disabling stroke in the low-risk studies, which increased for intermediate-risk, high-risk and all-risk studies (Supplementary Figure S1).

### Main Analyses (Secondary Outcomes)

#### *Myocardial Infarction*

A single study reported that the risk of MI at periprocedural time points was numerically increased by 38% for TAVI compared to SAVR (RR 1.38, 95% CI 0.23 to 8.20,  $P=0.73$ ,  $I^2$  N/A; 1 study,  $n=750$  patients<sup>7</sup>); however, this was not statistically significant (Supplementary Figure S2). The risk of MI was numerically decreased by 16% for TAVI compared to SAVR at 30 days (RR 0.84, 95% CI 0.55 to 1.28,  $P=0.41$ ,  $I^2$  0%; 9 studies,  $n=8,877$  patients<sup>1-9</sup>); however, this was not statistically significant (Supplementary Figure S2).

There was no evidence of a difference in the risk of MI for TAVI vs. SAVR at one year (RR 0.92, 95% CI 0.68 to 1.25,  $P=0.58$ ,  $I^2$  0%; 9 studies,  $n=8,901$  patients<sup>1-9</sup>), at two years (RR 0.91, 95% CI 0.68 to 1.23,  $P=0.54$ ,  $I^2$  0%; 6 studies,  $n=6,453$  patients<sup>2,4,6-8</sup>) or at five years following surgery (RR 1.08, 95% CI 0.73 to 1.61,  $P=0.70$ ,  $I^2$  28%; 4 studies,  $n=3,761$  patients<sup>2,3,7,8</sup>); however, these were not statistically significant changes (Supplementary Figure S2).

Heterogeneity was moderate at 30 days and one year for intermediate-risk studies; moderate for high-risk studies at two years; and low at five years.

Based on study risk group (defined by the criteria reported in Supplementary Table S3, which were not exclusively based on STS-PROM scores), the confidence intervals overlapped between each group at all timepoints, suggesting no significant difference in the risk of MI between study risk groups (Supplementary Figure S1).

### *Major Bleeding*

The risk of major bleeding was significantly decreased by 59% for TAVI compared to SAVR at periprocedural or in-hospital timepoints (RR 0.41, 95% CI 0.28 to 0.60,  $P < 0.00001$ ,  $I^2$  39%; 2 studies,  $n = 1,026$  patients<sup>7 8</sup>), by 63% at 30 days (RR 0.37, 95% CI 0.21 to 0.64,  $P = 0.0004$ ,  $I^2$  94%; 8 studies,  $n = 8,446$  patients<sup>1-7 9</sup>), by 62% at one year (RR 0.38, 95% CI 0.31 to 0.48,  $P < 0.00001$ ,  $I^2$  64%; 6 studies,  $n = 6,744$  patients<sup>1-4 7 9</sup>), by 54% at two years (RR 0.46, 95% CI 0.34 to 0.64,  $P < 0.00001$ ,  $I^2$  83%; 3 studies,  $n = 3,481$  patients<sup>2 3 7</sup>) and by 20% at five years (RR 0.80, 95% CI 0.69 to 0.93,  $P = 0.005$ ,  $I^2$  0%; 2 studies,  $n = 1,449$  patients<sup>2 7</sup>) (Supplementary Figure S3). Heterogeneity was moderate at periprocedural or in-hospital and one year timepoints, and high at 30 days and two years, possibly due to the different definitions of major bleeding in the two intermediate-risk studies (PARTNER 2A: life-threatening or disabling bleeding; SURTAVI: life-threatening or major bleeding). Although there was no evidence of heterogeneity at five years, it should be noted that these studies only used the definition 'major bleeding' in comparison with studies that reported data at the earlier time points, which predominantly used the definition 'life-threatening or disabling bleeding'. This was assessed further in sensitivity analysis (see 'Sensitivity Analyses' section; Supplementary Figure S4).

Based on study risk group (defined by the criteria reported in Supplementary Table S3, which were not exclusively based on STS-PROM scores), the confidence intervals overlapped between each group at all timepoints, suggesting no significant difference in major bleeding between study risk groups (Supplementary Figure S3).

### *Major Vascular Complications*

The risk of major vascular complications was significantly increased by 383% for TAVI compared to SAVR at periprocedural or in-hospital time points (RR 3.83, 95% CI 1.69 to 8.67,  $P = 0.001$ ,  $I^2$  0%; 2 studies,  $n = 1,026$  patients<sup>7 8</sup>), by 242% at 30 days (RR 2.42, 95% CI 1.55 to 3.80,  $P = 0.0007$ ,  $I^2$  72%; 7 studies,  $n = 8,376$  patients<sup>1-4 6 7 9</sup>), by 205% at one year (RR 2.05, 95% CI 1.38 to 3.04,  $P = 0.002$ ,  $I^2$  56%; 6 studies,  $n = 6,744$  patients<sup>1-4 7 9</sup>), by 239% at two years (RR 2.39, 95% CI 1.36 to 4.18,  $P = 0.002$ ,  $I^2$  66%; 3 studies,

n=3,480 patients<sup>2 3 7</sup>) and by 314% at five years (RR 3.14, 95% CI: 1.95 to 5.07, P<0.00001, I<sup>2</sup> 0%; 2 studies, n=1,449 patients<sup>2 7</sup>) (Supplementary Figure S5).

Based on study risk group (defined by the criteria reported in Table S3, which were not exclusively based on STS-PROM scores), the confidence intervals overlapped between each group at all timepoints, suggesting no significant difference in major vascular complications between study risk groups (Supplementary Figure S5).

#### *Permanent Pacemaker Implantation (PPM)*

A single study reported that the risk of permanent pacemaker (PPM) implantation was significantly increased by 719% for TAVI compared to SAVR at periprocedural timepoints (RR 7.19, 95% CI 3.11 to 16.62, P<0.00001, I<sup>2</sup> N/A; 1 study, n=750 patients<sup>7</sup>) (Supplementary Figure S6). Similarly, the risk of PPM implantation was significantly increased by 247% for TAVI compared to SAVR at 30 days (RR 2.47, 95% CI 1.55 to 3.93, P=0.0001, I<sup>2</sup> 87%; 7 studies, n=7,767 patients<sup>1-4 6-8</sup>), by 223% at one year (RR 2.23, 95% CI 1.44 to 3.46, P=0.0004, I<sup>2</sup> 89%; 7 studies, n=7,767 patients<sup>1-4 6-8</sup>), by 211% at two years (RR 2.11, 95% CI 1.31 to 3.42, P=0.002, I<sup>2</sup> 90%; 6 studies, n=6,367 patients<sup>2-4 6-8</sup>) and by 190% at five years (RR 1.90, 95% CI 1.14 to 3.16, P=0.01, I<sup>2</sup> 86%; 4 studies, n=3,761 patients<sup>2 3 7 8</sup>) (Supplementary Figure S6). However, all analyses had high levels of heterogeneity. While this heterogeneity could not be explained by the different study risk levels, it may be explained through differences in the definition of permanent pacemaker implantation, which in some cases did not specify whether pre-existing pacemakers at baseline were included or excluded in the analysis. Since these definitions were not consistently reported, sensitivity analyses were not possible.

Based on study risk group (defined by the criteria reported in Supplementary Table S3, which were not exclusively based on STS-PROM scores), the confidence intervals overlapped for low-risk, intermediate-risk and high-risk study risk groups at all timepoints; however, the confidence intervals for all-risk patients did not overlap with these other study risk groups at several timepoints, suggesting a significantly greater decrease in the risk of new PPM for SAVR compared to TAVI in all-risk patients (Supplementary Figure S6).

#### *Acute Kidney Injury*

The risk of acute kidney injury (AKI) was significantly decreased by 70% for TAVI compared to SAVR at periprocedural or in-hospital timepoints (RR 0.30, 95% CI 0.10 to 0.93, P=0.04, I<sup>2</sup> 39%; 2 studies, n=1,026 patients<sup>7 8</sup>), by 60% at 30 days (RR 0.40, 95% CI 0.30 to 0.53, P<0.00001, I<sup>2</sup> 0%; 6 studies, n=7,441 patients<sup>1-4 6 7</sup>), by 42% at one year (RR 0.58, 95% CI 0.34 to 1.00, P=0.05, I<sup>2</sup> 67%; 4 studies, n=4,831 patients<sup>1-3 7</sup>) and by 48% at two years (RR 0.52, 95% CI 0.33 to 0.80, P=0.003, I<sup>2</sup> 51%; 2 studies, n=2,782

patients<sup>37</sup>) (Supplementary Figure S7). Moderate heterogeneity was observed for the periprocedural, one-year and two-year analyses; no heterogeneity was observed at 30 days. One possible contributing factor to the observed heterogeneity was the different definitions of AKI used within the studies. Some studies included Stage 3 disease alone (PARTNER 1A), whilst other studies included Stage 2 to 3 (EVOLUT) or Stage 1 to 3 (PARTNER 2A) disease.

Based on study risk group (defined by the criteria reported in Supplementary Table S3, which were not exclusively based on STS-PROM scores), the confidence intervals overlapped between each group at all timepoints, suggesting no significant difference in the risk of AKI between study risk groups (Supplementary Figure S7).

#### *New-Onset or Worsening Atrial Fibrillation*

The risk of new-onset or worsening atrial fibrillation (NOW-AF) was significantly reduced by 77% for TAVI compared to SAVR at periprocedural or in-hospital timepoints (RR 0.23, 95% CI 0.06 to 0.91,  $P=0.04$ ,  $I^2$  95%; 2 studies,  $n=1,536$  patients<sup>47</sup>), by 71% at 30 days (RR 0.29, 95% CI 0.23 to 0.38,  $P<0.00001$ ,  $I^2$  80%; 7 studies,  $n=7,767$  patients<sup>1-46-8</sup>), by 64% at one year (RR 0.36, 95% CI 0.28 to 0.47,  $P<0.00001$ ,  $I^2$  85%; 7 studies,  $n=7,767$  patients<sup>1-46-8</sup>), by 64% at two years (RR 0.36, 95% CI 0.25 to 0.52,  $P<0.00001$ ,  $I^2$  86%; 4 studies,  $n=4,008$  patients<sup>3478</sup>) and by 55% at five years (RR 0.45, 95% CI 0.36 to 0.56,  $P<0.00001$ ,  $I^2$  37%; 2 studies,  $n=2,312$  patients<sup>38</sup>) (Supplementary Figure S8). Heterogeneity was high at periprocedural/in-hospital, 30 day, one year and two year timepoints, and moderate at five years.

Based on study risk group (defined by the criteria reported in Supplementary Table S3, which were not exclusively based on STS-PROM scores), the confidence intervals overlapped for intermediate-risk and high-risk groups at all timepoints; however, the confidence intervals for low-risk patients did not overlap with those in these two study risk groups at several timepoints, suggesting a significantly greater decrease in the risk of new-onset or worsening atrial fibrillation for TAVI compared to SAVR in low-risk patients (Supplementary Figure S8).

#### *Endocarditis*

The risk of endocarditis was numerically reduced by 21% for TAVI compared to SAVR at 30 days (RR 0.79, 95% CI 0.21 to 3.04,  $P=0.74$ ,  $I^2$  0%; 6 studies,  $n=6,310$  patients<sup>1489</sup>); however, this was not a statistically significant difference (Supplementary Figure S9).

There was no evidence of a difference in the risk of endocarditis for TAVI compared to SAVR at one year (RR 1.02, 95% CI 0.55 to 1.89,  $P=0.96$ ,  $I^2$  0%; 7 studies,  $n=7,088$  patients<sup>1489</sup>) or at two years (RR 0.99, 95% CI 0.43 to 2.24,  $P=0.97$ ,  $I^2$  25%; 4 studies;  $n=4,431$  patients<sup>24</sup>) (Supplementary Figure S9).

At five years, the risk of endocarditis was numerically increased by 134% for TAVI compared to SAVR (RR 1.34, 95% CI 0.87 to 2.05,  $P=0.18$ ,  $I^2$  0%; 4 studies,  $n=3,761$  patients<sup>2 3 7 8</sup>); however, this was not a statistically significant difference. Low or no heterogeneity was evident in any of these analyses (Supplementary Figure S9).

At six years, a single study reported no evidence of a difference in the risk of endocarditis in all-risk patients (RR 0.97, 95% CI 0.38 to 2.51,  $P=0.95$ ,  $I^2$  N/A; 1 study,  $n=274$ <sup>8</sup>).

Based on study risk group (defined by the criteria reported in Supplementary Table S3, which were not exclusively based on STS-PROM scores), the confidence intervals overlapped between each group at all timepoints, suggesting no significant difference in the risk of endocarditis between study risk groups (Supplementary Figure S9).

#### *Reintervention or Reoperation*

A single study reported that the risk of reintervention or reoperation was numerically increased by 459% for TAVI compared to SAVR at periprocedural timepoints (RR 4.59, 95% CI 0.22 to 95.32,  $P=0.32$ ,  $I^2$  N/A 1 study,  $n=750$  patients<sup>7</sup>); however, this was not a statistically significant difference and there was a large amount of uncertainty in the result (Supplementary Figure S10). The risk of reintervention or reoperation was numerically increased by 154% for TAVI compared to SAVR at 30 days (RR 1.54, 95% CI 0.50 to 4.77,  $P=0.46$ ,  $I^2$  40%; 6 studies,  $n=7,828$  patients<sup>1 3 4 6 7 9</sup>) and by 195% at one year (RR 1.95, 95% CI 0.92 to 4.13,  $P=0.08$ ,  $I^2$  50%; 6 studies,  $n=7,856$  patients<sup>1 3 4 6 7 9</sup>); however, very few events were identified by any study (especially at 30 days), this result was not statistically significant, and there was a large amount of uncertainty in the result (Supplementary Figure S10). There was moderate heterogeneity at 30 days. The risk of reintervention or reoperation was significantly increased by 278% for TAVI compared to SAVR at two years (RR 2.78, 95% CI 1.35 to 5.71,  $P=0.005$ ,  $I^2$  29%; 4 studies,  $n=5,478$  patients<sup>3 4 6 7</sup>) and by 367% at five years (RR 3.67, 95% CI 1.76 to 7.63,  $P=0.0005$ ,  $I^2$  0%; 3 studies,  $n=3,062$  patients<sup>3 7 8</sup>) (Supplementary Figure S10). There was low heterogeneity across these analyses.

Based on study risk group (defined by the criteria reported in Supplementary Table S3, which were not exclusively based on STS-PROM scores), the confidence intervals overlapped between each group at all timepoints, suggesting no significant difference in the risk of reintervention or reoperation between study risk groups (Supplementary Figure S10). Generally, there was a trend towards a lower risk of reintervention or reoperation for TAVI compared to SAVR in low-risk studies (EVOLUT, PARTNER 3), but a trend towards a higher risk of reintervention or reoperation for TAVI compared to SAVR in intermediate-, high- and all-risk studies.

### *Rehospitalisation*

The risk of rehospitalisation across all levels of surgical risk was numerically reduced by 12% for TAVI compared to SAVR at 30 days (RR 0.88, 95% CI 0.70 to 1.10,  $P=0.27$ ,  $I^2$  0%; 6 studies,  $n=7,645$  patients<sup>1-4 6 7</sup>); however, this did not reach statistical significance (Supplementary Figure S11). There was no evidence of a difference in the risk of rehospitalisation for TAVI compared to SAVR at one year following surgery (RR 0.95, 95% CI 0.76 to 1.20,  $P=0.69$ ,  $I^2$  65%; 6 studies,  $n=7,645$  patients<sup>1-4 6 7</sup>) (Supplementary Figure S11). The risk of rehospitalisation was numerically increased by 14% for TAVI compared to SAVR at two years (RR 1.14, 95% CI 0.94 to 1.38,  $P=0.19$ ,  $I^2$  59%; 5 studies,  $n=6,177$  patients<sup>2-4 6 7</sup>); however, this was not a statistically significant difference (Supplementary Figure S11). The risk of rehospitalisation was significantly increased by 35% for TAVI compared to SAVR at five years (RR 1.35, 95% CI 1.20 to 1.51,  $P<0.00001$ ,  $I^2$  0%; 3 studies,  $n=3,481$  patients<sup>2 3 7</sup>) (Supplementary Figure S11). Heterogeneity was low at 30 days, two years and five years, and moderate at one year.

One study also reported continuous data for the number of hospital days from the index surgical procedure or randomisation into the control arm up to one-year post procedure or randomisation. This study reported that the total number of days spent in hospital after the index procedure was numerically reduced for TAVI compared to SAVR (17.42 days (19.05 SD) vs. 20.14 days (20.14 SD); 1 study,  $n=699$  patients<sup>2</sup>); however, no statistical comparisons were provided.

Based on study risk group (defined by the criteria reported in Supplementary Table S3, which were not exclusively based on STS-PROM scores), the confidence intervals overlapped for intermediate-risk and high-risk patients at 1 year; however, the confidence intervals for low-risk patients at this timepoint did not overlap with those in other study risk groups at several timepoints, suggesting a significantly greater decrease in the risk of rehospitalisation for TAVI compared to SAVR in low-risk patients (Supplementary Figure S11).

### *Length of Hospital Stay*

#### *Length of Stay in ICU*

Four studies reported on the length of stay in the intensive care unit (ICU)<sup>2-4 9</sup>. All studies reported that patients spent fewer days in the ICU after TAVI treatment (2-3 days) than after SAVR treatment (3-5 days); the mean difference ranged from -1 to -2 days (based on  $n=4,549$  patients) (Supplementary Table S4).

#### *Length of Stay in Hospital*

Four studies reported sufficient information (mean and SD values) to enable meta-analysis to be performed to analyse length of hospital stay.<sup>5-8</sup> Pooled analysis suggested that the total length of hospital stay after the index procedure was significantly shorter following TAVI compared to SAVR (mean difference [MD]

3.08 days, 95% CI -4.86 to -1.29 days,  $P=0.0007$ ,  $I^2$  84%; 4 studies,  $n=2,758$  patients<sup>5-8</sup>) (Supplementary Figure S12). Overall, seven out of the eight studies that presented data for length of hospital stay reported a reduction in the length of hospital stay for TAVI compared to SAVR (Supplementary Table S5)<sup>1-4 6-9</sup>. The difference in stay generally ranged from -3.0 to -4.0 days for TAVI compared to SAVR (Supplementary Table S5). One of eight studies reported a non-significant increase of 1.2 days in the length of hospital stay for TAVI compared to SAVR (Supplementary Table S5).<sup>5</sup>

#### *Valve Durability*

Two studies reported on rates of structural valve deterioration for TAVI compared to SAVR.<sup>2 8</sup> At five years, the rate of structural valve deterioration (not further defined) was reported to be zero in both TAVI and SAVR patients in the PARTNER 1A trial (Supplementary Table S9).<sup>2</sup> At six years, the rate of structural valve deterioration was reported to be significantly lower in the TAVI arm (4.8%) compared to the SAVR arm (24%) in the NOTION study (Supplementary Table S9) (79% reduced risk; RR 0.21, 95% CI 0.10 to 0.46,  $P<0.0001$ ; 1 study,  $n=274$  patients<sup>8</sup>). This was based on a definition of structural valve deterioration as moderate/severe hemodynamic structural valve deterioration (mean gradient  $\geq 20$  mm Hg, increase in mean gradient  $\geq 10$  mm Hg from three months post-procedure, or  $>$  mild intraprosthetic aortic regurgitation either new or worsening from three months post-procedure. However, three other definitions of valve dysfunction were reported by the NOTION study, with no statistically significant differences between TAVI vs. SAVR arms (Supplementary Table S9).

A single study (US CoreValve) reported on rates of valve frame fracture for the TAVI arm alone.<sup>7</sup> No cases of valve frame fracture were reported in 21 TAVI patients who had undergone surgical valve explantation or autopsy after death. Transcatheter valves had been implanted for a median duration of 17 days (range: 0 to 503 days).

#### *Recovery Time*

No studies were identified that reported on recovery time.

#### *Pain*

No studies were identified that reported on pain.

#### **Subgroup Analyses**

For the major or disabling stroke outcome, subgroup results generally suggested that patients at low or intermediate risk (based exclusively on STS-PROM scores alone) had a higher risk of a major or disabling stroke after TAVI compared to patients at high risk by one year following surgery (Supplementary Table S6); and that patients who had TAVI through the transfemoral route had a significantly or numerically



lower risk of a major or disabling stroke than patients who had TAVI through a non-TF route from periprocedural timepoints through to 5 years following surgery (Supplementary Table S7).

For the myocardial infarction outcome, subgroup results generally suggested that patients at low or intermediate risk (based exclusively on STS-PROM scores alone) had a higher risk of MI after TAVI compared to patients at high risk by one year following surgery (Supplementary Table S6); and that patients who had TAVI through the transfemoral route had a significantly or numerically lower risk of MI than patients who had TAVI through a non-TF route from 30 days to 2 years following surgery (Supplementary Table S7).

For the major bleeding outcome, subgroup results generally suggested that patients at low or intermediate risk (based exclusively on STS-PROM scores alone) had a higher risk of major bleeding after TAVI compared to patients at high risk by one year following surgery (Supplementary Table S6); and that patients who had TAVI through the transfemoral route had a significantly or numerically lower risk of major bleeding than patients who had TAVI through a non-TF route from periprocedural timepoints through to 2 years following surgery (Supplementary Table S7).

For the major vascular complications outcome, subgroup results generally suggested that patients at low or intermediate risk (based exclusively on STS-PROM scores alone) had a significantly higher risk of major vascular complications after TAVI compared to patients at high risk by one year following surgery (Supplementary Table S6); and that patients who had TAVI through the transfemoral route had a numerically higher risk of major vascular complications than patients who had TAVI through a non-TF route from periprocedural timepoints through to 2 years following surgery (Supplementary Table S7).

For the PPM implantation outcome, subgroup results generally suggested that patients at low or intermediate risk (based exclusively on STS-PROM scores alone) had a significantly higher risk of PPM implantation after TAVI compared to patients at high risk by one year following surgery (Supplementary Table S6); that patients who had TAVI through the transfemoral route had no difference in the risk of PPM implantation compared to patients who had TAVI through a non-TF route from 1 to 2 years following surgery (Supplementary Table S7); and that patients receiving a self-expanding valve were at higher risk of PPM implantation compared to patients receiving a balloon expandable valve from 30 days to 5 years following surgery (Supplementary Table S8).

For the acute kidney injury outcome, subgroup results generally suggested that patients at low or intermediate risk (based exclusively on STS-PROM scores alone) had a numerically lower risk of AKI after TAVI compared to patients at high risk by one year following surgery (Supplementary Table S6); and that patients who had TAVI through the transfemoral route had a numerically or significantly lower risk of AKI

than patients who had TAVI through a non-TF route at periprocedural timepoints and at 30 days or 2 years following surgery (Supplementary Table S7).

For the new-onset or worsening atrial fibrillation outcome, subgroup results generally suggested that patients at low or intermediate risk (based exclusively on STS-PROM scores alone) had a numerically lower risk of NOW-AF after TAVI compared to patients at high risk by one year following surgery (Supplementary Table S6); and that patients who had TAVI through the transfemoral route had a numerically or significantly lower risk of NOW-AF than patients who had TAVI through a non-TF route from 30 days to 2 years following surgery (Supplementary Table S7).

For the endocarditis outcome, subgroup results generally suggested that patients at low or intermediate risk (based exclusively on STS-PROM scores alone) had a numerically lower risk of endocarditis after TAVI compared to patients at high risk by one year following surgery (Supplementary Table S6); and that patients who had TAVI through the transfemoral route had no difference in the risk of endocarditis than patients who had TAVI through a non-TF route up to 1 year following surgery (Supplementary Table S7).

For the reintervention or reoperation outcome, subgroup results generally suggested that patients at low or intermediate risk (based exclusively on STS-PROM scores alone) had a numerically higher risk of reintervention or reoperation after TAVI compared to patients at high risk by one year following surgery (Supplementary Table S6); and that patients who had TAVI through the transfemoral route had a numerically lower risk of reintervention or reoperation from periprocedural timepoints through to 2 years, and a numerically higher risk at 5 years compared to patients who had TAVI through a non-TF route up to 1 year following surgery (Supplementary Table S7).

For the rehospitalisation outcome, subgroup results generally suggested that patients at low or intermediate risk (based exclusively on STS-PROM scores alone) had a numerically lower risk of rehospitalisation after TAVI compared to patients at high risk by one year following surgery (Supplementary Table S6); and that patients who had TAVI through the transfemoral route had a numerically lower risk of rehospitalisation compared to patients who had TAVI through a non-TF route from 30 days to 5 years (Supplementary Table S7).

#### **Sensitivity Analyses**

For the major bleeding outcome, a sensitivity analysis focussing on the four studies that reported exclusively on major bleeding defined as “life-threatening or disabling bleeding” at one year reduced the overall level of heterogeneity but it still remained high (Supplementary Figure S6).

SUPPLEMENTARY TABLE S1: INCLUSION AND EXCLUSION CRITERIA

| Study ID                        | Risk Level | Inclusion criteria                                                                                                                                                                                                                                                                                                                                                                                                                                                                                                                                                                                                                                                                                                                                         | Exclusion criteria                                                                                                                                                                                                                                                                                                                                                                                                                                                                                                                                                                                                                                                                                                                                                                                                                                                                                                                                                                                                                                                                                                                                                                                                                                                                                                                                                         |
|---------------------------------|------------|------------------------------------------------------------------------------------------------------------------------------------------------------------------------------------------------------------------------------------------------------------------------------------------------------------------------------------------------------------------------------------------------------------------------------------------------------------------------------------------------------------------------------------------------------------------------------------------------------------------------------------------------------------------------------------------------------------------------------------------------------------|----------------------------------------------------------------------------------------------------------------------------------------------------------------------------------------------------------------------------------------------------------------------------------------------------------------------------------------------------------------------------------------------------------------------------------------------------------------------------------------------------------------------------------------------------------------------------------------------------------------------------------------------------------------------------------------------------------------------------------------------------------------------------------------------------------------------------------------------------------------------------------------------------------------------------------------------------------------------------------------------------------------------------------------------------------------------------------------------------------------------------------------------------------------------------------------------------------------------------------------------------------------------------------------------------------------------------------------------------------------------------|
| <b>High Risk</b>                |            |                                                                                                                                                                                                                                                                                                                                                                                                                                                                                                                                                                                                                                                                                                                                                            |                                                                                                                                                                                                                                                                                                                                                                                                                                                                                                                                                                                                                                                                                                                                                                                                                                                                                                                                                                                                                                                                                                                                                                                                                                                                                                                                                                            |
| <b>PARTNER 1A<sup>2</sup></b>   | High       | <p>Patients with severe aortic stenosis (aortic-valve area of less than 0.8cm<sup>2</sup> plus either a mean valve gradient of at least 40 mm Hg or a peak velocity of at least 4.0m per second), and cardiac symptoms (New York Heart Association class II function or worse). Included patients were considered candidates for conventional surgical aortic-valve repair with a high risk for operative complications or death on the basis of coexisting conditions that were associated with a risk of death of at least 15% by 30 days after the procedure, as defined by surgeons at each study centre (based on a guideline score of at least 10% on the risk model developed by the Society of Thoracic Surgeons).</p>                             | <p>Bicuspid or non-calcified valve, coronary artery disease requiring revascularisation, a left ventricular ejection fraction of less than 20%, an aortic annulus diameter of less than 18mm or more than 25mm, severe (4+) mitral or aortic regurgitation, a recent neurological event, and severe renal insufficiency.</p>                                                                                                                                                                                                                                                                                                                                                                                                                                                                                                                                                                                                                                                                                                                                                                                                                                                                                                                                                                                                                                               |
| <b>US CoreValve<sup>7</sup></b> | High       | <p>Patients with senile degenerative severe aortic stenosis (defined as an initial aortic valve area of <math>\leq 0.8</math> cm<sup>2</sup> or an aortic valve area index <math>\leq 0.5</math>cm<sup>2</sup>/m<sup>2</sup> AND either mean aortic-valve gradient &gt; 40mm Hg or a peak aortic-jet velocity &gt;4.0m/s); symptomatic as defined by NYHA class II or higher; considered to be at increased risk for undergoing surgical aortic-valve replacement (defined as whether two cardiac surgeons and one interventional cardiologist estimated that the risk of death within 30 days after surgery was <math>\geq 15\%</math> and predicted operative mortality or serious irreversible morbidity risk &lt;50% within 30 days after surgery)</p> | <p>Evidence of acute MI <math>\leq 30</math> days before treatment; any percutaneous coronary or peripheral interventional procedure performed within 30 days prior to the index procedure with bare metal stents and 6 months with drug eluting stents; blood dyscrasias as defined by leukopenia (WBC &lt;1000 mm<sup>3</sup>), thrombocytopenia (platelet count &lt;50,000 cells/mm<sup>3</sup>), history of bleeding diathesis or coagulopathy or hypercoagulable states; untreated clinically significant coronary artery disease requiring revascularization; cardiogenic shock manifested by low cardiac output, vasopressor dependence or mechanical haemodynamic support; need for emergency surgery for any reason; severe ventricular dysfunction with LVEF &lt;20% as measured by resting echocardiogram; recent (within 6 months) cerebrovascular accident or transient ischaemic attack; end stage renal disease requiring chronic dialysis or creatinine clearance &lt;20 cc/min; GI bleeding within the past 3 months; known hypersensitivity to medications including aspirin, heparin, nitinol, ticlopidine/clopidogrel or contrast media; ongoing sepsis, including active endocarditis; refusal of blood transfusion; life expectancy &lt;12 months due to associated non-cardiac comorbidities; severe dementia; symptomatic carotid or vertebral</p> |

| Study ID                      | Risk Level   | Inclusion criteria                                                                                                                                                                                                                                                                                                                                                                                                                                                                                                                                                   | Exclusion criteria                                                                                                                                                                                                                                                                                                                                                                                                                                                                                                                                                                                                                                                                                                                                                                                                                                                                                                                                                                                                                                                                                                                                                                                                                                                                                                                                                                                                                                                                                                                                                                                                          |
|-------------------------------|--------------|----------------------------------------------------------------------------------------------------------------------------------------------------------------------------------------------------------------------------------------------------------------------------------------------------------------------------------------------------------------------------------------------------------------------------------------------------------------------------------------------------------------------------------------------------------------------|-----------------------------------------------------------------------------------------------------------------------------------------------------------------------------------------------------------------------------------------------------------------------------------------------------------------------------------------------------------------------------------------------------------------------------------------------------------------------------------------------------------------------------------------------------------------------------------------------------------------------------------------------------------------------------------------------------------------------------------------------------------------------------------------------------------------------------------------------------------------------------------------------------------------------------------------------------------------------------------------------------------------------------------------------------------------------------------------------------------------------------------------------------------------------------------------------------------------------------------------------------------------------------------------------------------------------------------------------------------------------------------------------------------------------------------------------------------------------------------------------------------------------------------------------------------------------------------------------------------------------------|
|                               |              |                                                                                                                                                                                                                                                                                                                                                                                                                                                                                                                                                                      | artery disease; declined surgical aortic valve replacement; native aortic annulus <18mm or >29mm; pre-existing prosthetic heart valve in any position; mixed aortic valve disease; moderate to severe (3-4+) mitral regurgitation or (4+) tricuspid regurgitation; moderate to severe mitral stenosis; hypertrophic obstructive cardiomyopathy; intracardiac mass, thrombus or vegetation; severe basal septal hypertrophy with an outflow gradient; aortic root angulation; ascending aorta that exceeds the maximum diameter for any given native aortic annulus; congenital bicuspid or unicuspid valve; sinus of valsalva anatomy that prevents adequate coronary perfusion; transarterial access not able to accommodate an 18F sheath                                                                                                                                                                                                                                                                                                                                                                                                                                                                                                                                                                                                                                                                                                                                                                                                                                                                                 |
| <b>Intermediate Risk</b>      |              |                                                                                                                                                                                                                                                                                                                                                                                                                                                                                                                                                                      |                                                                                                                                                                                                                                                                                                                                                                                                                                                                                                                                                                                                                                                                                                                                                                                                                                                                                                                                                                                                                                                                                                                                                                                                                                                                                                                                                                                                                                                                                                                                                                                                                             |
| <b>PARTNER 2A<sup>3</sup></b> | Intermediate | Symptomatic senile degenerative aortic valve stenosis (mean gradient >40 mmHg or jet velocity >4.0 m/s and initial aortic valve area of $\leq 0.8\text{cm}^2$ or indexed EOA $< 0.5\text{ cm}^2/\text{m}^2$ ); symptomatic from aortic valve stenosis as demonstrated by NYHA Functional Class II or greater; consensus from heart team that valve implantation would likely benefit the patient; agreement to comply with all post-procedure follow-up visits through 5 years; STS $\geq 4$ or $< 4$ if the heart team determines intermediate-risk patient profile | Heart team assessment of inoperability; evidence of an acute MI $\leq 1$ month before intended treatment; congenital unicuspid or congenital bicuspid valve or non-calcified valve; mixed aortic valve disease; preexisting mechanical or bioprosthetic valve in any position; complex coronary artery disease (unprotected left main coronary artery or syntax score $> 32$ ); any therapeutic invasive cardiac procedure resulting in a permanent implant performed within 30 days of procedure; balloon valvuloplasty within 30 days of procedure (unless a bridge to procedure with a qualifying ECHO); planned concomitant surgical or transcatheter ablation for atrial fibrillation; leukopenia (WBC $< 3000$ cell/ml), acute anaemia (Hgb $< 9$ g/dl), thrombocytopenia (Plt $< 50,000$ cell/ml); hypertrophic cardiomyopathy with or without obstruction; severe ventricular dysfunction with LVEF $< 20\%$ ; echocardiographic evidence of intracardiac mass, thrombus or vegetation; active upper GI bleeding within 3 months prior to procedure; contraindication or hypersensitivity to all anticoagulation regimens; native aortic annulus size $< 18\text{mm}$ or $> 27\text{ mm}$ as measured by echocardiogram; clinical or neuroimaging confirmed stroke or transient ischemic attack within 6 months of procedure, renal insufficiency (creatinine $> 3.0$ mg/dl) and/or renal replacement therapy at the time of screening; estimated life expectancy of $< 24$ months due to carcinomas, chronic liver disease, chronic renal disease or chronic end stage pulmonary disease; expectation that patient |

| Study ID             | Risk Level   | Inclusion criteria                                                                                                                                                                                                                                                                                                                                                                                                                                                                                                                                                                                                                                                                                                                                                                                                                                       | Exclusion criteria                                                                                                                                                                                                                                                                                                                                                                                                                                                                                                                                                                                                                                                                                                                                                                                                                                                                                                                                                                                                                                                                                                                                                                                                                                                                                                                                                                                                                                                                                                                                                                                                                                                                                                                                                                                                                                                                                                                                                                                                                                                                                                                                                                                                                                                                                                                                                                                                                                                                                                                                                                                                          |
|----------------------|--------------|----------------------------------------------------------------------------------------------------------------------------------------------------------------------------------------------------------------------------------------------------------------------------------------------------------------------------------------------------------------------------------------------------------------------------------------------------------------------------------------------------------------------------------------------------------------------------------------------------------------------------------------------------------------------------------------------------------------------------------------------------------------------------------------------------------------------------------------------------------|-----------------------------------------------------------------------------------------------------------------------------------------------------------------------------------------------------------------------------------------------------------------------------------------------------------------------------------------------------------------------------------------------------------------------------------------------------------------------------------------------------------------------------------------------------------------------------------------------------------------------------------------------------------------------------------------------------------------------------------------------------------------------------------------------------------------------------------------------------------------------------------------------------------------------------------------------------------------------------------------------------------------------------------------------------------------------------------------------------------------------------------------------------------------------------------------------------------------------------------------------------------------------------------------------------------------------------------------------------------------------------------------------------------------------------------------------------------------------------------------------------------------------------------------------------------------------------------------------------------------------------------------------------------------------------------------------------------------------------------------------------------------------------------------------------------------------------------------------------------------------------------------------------------------------------------------------------------------------------------------------------------------------------------------------------------------------------------------------------------------------------------------------------------------------------------------------------------------------------------------------------------------------------------------------------------------------------------------------------------------------------------------------------------------------------------------------------------------------------------------------------------------------------------------------------------------------------------------------------------------------------|
| SURTAVI <sup>6</sup> | Intermediate | <p>Co-morbidities resulting in predicted risk of operative mortality of <math>\geq 3\%</math> and <math>&lt; 15\%</math> at 30 days; heart team unanimously agree on treatment proposal and eligibility for randomisation based on clinical judgement; severe aortic stenosis presenting with a) initial aortic valve area <math>\leq 1.0 \text{ cm}^2</math> or aortic valve area index <math>&lt; 0.6 \text{ cm}^2/\text{m}^2</math> AND (b) mean gradient <math>&gt; 40 \text{ mmHg}</math> or <math>V_{\text{max}} &gt; 4 \text{ m/sec}</math> by resting echocardiogram or simultaneous pressure recordings at cardiac catheterisation or velocity ratio <math>&lt; 0.25</math>; symptomatic from aortic valve stenosis, as demonstrated by NYHA Functional Class II or greater; subject meets minimum age required to provide informed consent</p> | <p>will not improve despite treatment; active bacterial endocarditis within 6 months of procedure</p> <p>Refused SAVR as a treatment option; any condition considered a contraindication for placement of bioprosthetic valve; known hypersensitivity or contraindication to all anticoagulation/antiplatelet regimens, nitinol or sensitivity to contrast media which cannot be adequately pre-medicated; blood dyscrasias defined as: leukopenia (WBC <math>&lt; 1000 \text{ mm}^3</math>), thrombocytopenia (platelet count <math>&lt; 50,000 \text{ cells/mm}^3</math>), history of bleeding diathesis or coagulopathy; ongoing sepsis, including active endocarditis; any percutaneous coronary or peripheral interventional procedure performed within 30 days prior to randomisation; symptomatic carotid or vertebral artery disease or successful treatment of carotid stenosis within six weeks of randomisation; cardiogenic shock manifested by low cardiac output, vasopressor dependence or mechanical hemodynamic support; recent (within 6 months of randomisation) cerebrovascular accident or transient ischemic attack; active gastrointestinal bleeding; refusal of blood transfusion; severe dementia; multivessel coronary artery disease with a Syntax score <math>&gt; 22</math> and/or unprotected left main coronary artery; estimated life expectancy of <math>&lt; 24</math> months due to associated non-cardiac comorbidities; evidence of an acute myocardial infarction <math>\leq 30</math> days before index procedure; true porcelain aorta; extensive mediastinal radiation; liver failure (Child-C); reduced ventricular function with LVEF <math>&lt; 20\%</math>; uncontrolled atrial fibrillation; end-stage renal disease requiring chronic dialysis or creatinine clearance <math>&lt; 20 \text{ cc/min}</math>; pulmonary hypertension (systolic pressure <math>&gt; 80 \text{ mmHg}</math>); severe COPD (FEV1 <math>&lt; 750 \text{ cc}</math>); Marfan syndrome or other connective tissue disease; native aortic annulus <math>&lt; 18 \text{ mm}</math> or <math>&gt; 29 \text{ mm}</math>; pre-existing prosthetic heart valve in any position; mixed aortic valve disease; severe mitral or tricuspid regurgitation; severe mitral stenosis; hypertrophic obstructive cardiomyopathy; evidence of new or untreated intracardiac mass, thrombus or vegetation; aortic root angulation; congenital bicuspid or unicuspid valve; sinus of valsalva anatomy that would prevent adequate coronary perfusion; transarterial access not able to accommodate an 18-Fr sheath.</p> |

| Study ID                     | Risk Level | Inclusion criteria                                                                                                                                                                                                                                                                                                                                                                                                                                                                                                                                                                                                                                                                                                                                                                                                                                                                                                                                                                                                                                                                                                                                                                                                                                                                                                                                                                                                                                                                                                                                                                          | Exclusion criteria                                                                                                                                                                                                                                                                                                                                                                                                                                                                                                                                                                                                                                                                                                                                                                                                                                                                                                                                                                                                                                                                                                                                                                                                                                                                                                                                                                                                                                                                                                                                                                                                                                                                                                                                                                                                        |
|------------------------------|------------|---------------------------------------------------------------------------------------------------------------------------------------------------------------------------------------------------------------------------------------------------------------------------------------------------------------------------------------------------------------------------------------------------------------------------------------------------------------------------------------------------------------------------------------------------------------------------------------------------------------------------------------------------------------------------------------------------------------------------------------------------------------------------------------------------------------------------------------------------------------------------------------------------------------------------------------------------------------------------------------------------------------------------------------------------------------------------------------------------------------------------------------------------------------------------------------------------------------------------------------------------------------------------------------------------------------------------------------------------------------------------------------------------------------------------------------------------------------------------------------------------------------------------------------------------------------------------------------------|---------------------------------------------------------------------------------------------------------------------------------------------------------------------------------------------------------------------------------------------------------------------------------------------------------------------------------------------------------------------------------------------------------------------------------------------------------------------------------------------------------------------------------------------------------------------------------------------------------------------------------------------------------------------------------------------------------------------------------------------------------------------------------------------------------------------------------------------------------------------------------------------------------------------------------------------------------------------------------------------------------------------------------------------------------------------------------------------------------------------------------------------------------------------------------------------------------------------------------------------------------------------------------------------------------------------------------------------------------------------------------------------------------------------------------------------------------------------------------------------------------------------------------------------------------------------------------------------------------------------------------------------------------------------------------------------------------------------------------------------------------------------------------------------------------------------------|
| <b>Low Risk</b>              |            |                                                                                                                                                                                                                                                                                                                                                                                                                                                                                                                                                                                                                                                                                                                                                                                                                                                                                                                                                                                                                                                                                                                                                                                                                                                                                                                                                                                                                                                                                                                                                                                             |                                                                                                                                                                                                                                                                                                                                                                                                                                                                                                                                                                                                                                                                                                                                                                                                                                                                                                                                                                                                                                                                                                                                                                                                                                                                                                                                                                                                                                                                                                                                                                                                                                                                                                                                                                                                                           |
| <b>EVOLUT<sup>1</sup></b>    | Low        | Severe aortic-valve stenosis with suitable anatomy for TAVI or surgery and no more than a predicted 3% risk of death by 30 days with surgery, as assessed by members of the local heart team. For symptomatic patients, aortic stenosis was defined as an aortic-valve area $\leq 1.0$ cm <sup>2</sup> (or area index of $\leq 0.6$ cm <sup>2</sup> /m <sup>2</sup> ) or a mean gradient of 40 mm Hg or more or maximal aortic-valve velocity of 4.0 m or more per second as assessed by transthoracic echocardiography performed with the patient at rest. For asymptomatic patients, aortic stenosis was defined as: i. valve area of $\leq 1.0$ cm <sup>2</sup> (or aortic valve area index of $\leq 0.6$ cm <sup>2</sup> /m <sup>2</sup> ) AND maximal aortic velocity $\geq 5.0$ m/sec or mean gradient $\geq 60$ mmHg by transthoracic echocardiography at rest; OR ii. Aortic valve area of $\leq 1.0$ cm <sup>2</sup> (or aortic valve area index of $\leq 0.6$ cm <sup>2</sup> /m <sup>2</sup> ) AND a mean gradient $\geq 40$ mmHg or maximal aortic valve velocity $\geq 4.0$ m/sec by transthoracic echocardiography at rest AND an exercise tolerance test that demonstrates a limited exercise capacity, abnormal blood pressure response or arrhythmia; OR iii. Aortic valve area of $\leq 1.0$ cm <sup>2</sup> (or aortic valve area index of $\leq 0.6$ cm <sup>2</sup> /m <sup>2</sup> ) AND mean gradient $\geq 40$ mmHg or maximal aortic valve velocity $\geq 4.0$ m/sec by transthoracic echocardiography at rest AND a left ventricular ejection fraction $< 50\%$ . | Patients with bicuspid aortic valves; candidates for mechanical valves; severe mitral/tricuspid regurgitation or moderate/severe mitral stenosis amenable to surgical replacement or repair; pre-existing prosthetic heart valve in any position; hypertrophic obstructive cardiomyopathy with left ventricular outflow gradient; prohibitive left ventricular outflow tract calcification; sinus of Valsalva diameter unsuitable for placement of the self-expanding bioprosthesis; aortic annulus diameter $< 18$ or $> 30$ mm; significant aortopathy requiring ascending aortic replacement; blood dyscrasias (defined as leukopenia (WBC $< 1000$ mm <sup>3</sup> ), thrombocytopenia (platelet count $< 50,000$ cells/mm <sup>3</sup> ), history of bleeding diathesis or coagulopathy of hypercoagulable states); ongoing sepsis (including active endocarditis); percutaneous coronary or peripheral interventional procedure with a bare metal stent within 30 days prior to randomisation; drug eluting stent implanted within 180 days prior to randomisation; multivessel coronary artery disease with a synergy between percutaneous coronary intervention with SYNTAX score $> 22$ and/or unprotected left main coronary artery; symptomatic carotid or vertebral artery disease or successful treatment of carotid stenosis within 10 weeks of heart team assessment; cardiogenic shock manifested by low cardiac output, vasopressor dependence or mechanical haemodynamic support; recent cerebrovascular accident or transient ischaemic attack; gastrointestinal bleeding that would preclude anti-coagulation; severe dementia; estimated life expectancy $< 24$ months; evidence of an acute myocardial infarction $\leq 30$ days before the trial procedure due to unstable coronary artery disease |
| <b>PARTNER 3<sup>4</sup></b> | Low        | Severe, calcific aortic stenosis (defined as AVA $\leq 1.0$ cm <sup>2</sup> or AVA index $\leq 0.6$ cm <sup>2</sup> /m <sup>2</sup> and jet velocity $\geq 4.0$ m/s or mean gradient $\geq 40$ mmHg AND NYHA functional class $\geq 2$ or exercise tolerance test that demonstrates a limited exercise capacity, abnormal blood pressure response or arrhythmia OR asymptomatic with LVEF $< 50\%$ ); heart team agrees the patient has a risk of operative mortality and has an STS $< 4$ .                                                                                                                                                                                                                                                                                                                                                                                                                                                                                                                                                                                                                                                                                                                                                                                                                                                                                                                                                                                                                                                                                                | Native aortic annulus size unsuitable for sizes 20, 23, 26 or 29mm THV based on 3-D imaging analysis; ilio-femoral vessel characteristics that would preclude safe placement of the introducer sheath; evidence of an acute myocardial infarction $\leq 1$ month (30 days) before randomisation; congenital unicuspid, bicuspid or non-calcified aortic valve; severe aortic regurgitation ( $> 3+$ ); severe mitral regurgitation ( $> 3+$ ) or moderate (or more than moderate) stenosis; pre-existing mechanical or bioprosthetic valve in any position; complex coronary artery disease (unprotected left main coronary artery, syntax score $> 32$ in                                                                                                                                                                                                                                                                                                                                                                                                                                                                                                                                                                                                                                                                                                                                                                                                                                                                                                                                                                                                                                                                                                                                                                |

| Study ID                                           | Risk Level                       | Inclusion criteria                                                                                                                                                                                 | Exclusion criteria                                                                                                                                                                                                                                                                                                                                                                                                                                                                                                                                                                                                                                                                                                                                                                                                                                                                                                                                                                                                                                                                                                                                                                                                                                                                                                                                                                                                                                                                                                                                                                                                                                                                                                                                                                                                                                                                                                                                                                                                                                                       |
|----------------------------------------------------|----------------------------------|----------------------------------------------------------------------------------------------------------------------------------------------------------------------------------------------------|--------------------------------------------------------------------------------------------------------------------------------------------------------------------------------------------------------------------------------------------------------------------------------------------------------------------------------------------------------------------------------------------------------------------------------------------------------------------------------------------------------------------------------------------------------------------------------------------------------------------------------------------------------------------------------------------------------------------------------------------------------------------------------------------------------------------------------------------------------------------------------------------------------------------------------------------------------------------------------------------------------------------------------------------------------------------------------------------------------------------------------------------------------------------------------------------------------------------------------------------------------------------------------------------------------------------------------------------------------------------------------------------------------------------------------------------------------------------------------------------------------------------------------------------------------------------------------------------------------------------------------------------------------------------------------------------------------------------------------------------------------------------------------------------------------------------------------------------------------------------------------------------------------------------------------------------------------------------------------------------------------------------------------------------------------------------------|
|                                                    |                                  |                                                                                                                                                                                                    | <p>absence of prior revascularisation or heart team assessment that optimal revascularisation cannot be performed); symptomatic carotid or vertebral artery disease or successful treatment of carotid stenosis within 30 days of randomisation; leukopenia (WBC &lt;3000 cells/ml), anaemia (Hgb &lt;9g/dl), thrombocytopenia (Plt &lt;50,000 cells/ml), history of bleeding diathesis or coagulopathy or hypercoagulable states; haemodynamic or respiratory instability requiring inotropic support, mechanical ventilation or mechanical heart assistance within 30 days of randomisation; hypertrophic cardiomyopathy with obstruction; ventricular dysfunction with LVEF &lt;30%; cardiac imaging evidence of intracardiac mass, thrombus or vegetation; inability to tolerate or a condition precluding treatment with anti-thrombotic/anti-coagulation therapy during or after valve implant procedure; stroke or transient ischaemic attack within 90 days of randomisation; renal insufficiency (eGFR &lt;30 ml/min per the Cockcroft-Gault formula) or renal replacement therapy at the time of screening; active bacterial endocarditis within 180 days of randomisation; severe lung disease (FEV1 &lt;50% predicted) or currently on home oxygen; severe pulmonary hypertension; history of cirrhosis or active liver disease; significant frailty as determined by the heart team; significant abdominal or thoracic aortic disease (such as porcelain aorta, aneurysm, severe calcification, aortic coarctation etc) that would preclude safe passage of the delivery system or cannulation and aortotomy for surgical AVR; hostile chest or conditions or complications from prior surgery that would preclude safe reoperation; patient refuses blood products; BMI &gt;50 kg/m<sup>2</sup>; estimated life expectancy &lt;24 months; absolute contraindications or allergy to iodinated contrast that cannot be adequately treated with pre-medication; immobility that would prevent completion of study procedures (e.g. six-minute walk tests)</p> |
| <b>Intermediate-High (≥70y) or Any (≥80y) Risk</b> |                                  |                                                                                                                                                                                                    |                                                                                                                                                                                                                                                                                                                                                                                                                                                                                                                                                                                                                                                                                                                                                                                                                                                                                                                                                                                                                                                                                                                                                                                                                                                                                                                                                                                                                                                                                                                                                                                                                                                                                                                                                                                                                                                                                                                                                                                                                                                                          |
| UK TAVI <sup>9</sup>                               | Intermediate-High (≥70 years) or | Severe symptomatic aortic stenosis referred for intervention; aged ≥ 80 or ≥70 with intermediate or high operative risk from conventional AVR, as determined by the MDT; both conventional AVR and | Intervention deemed inappropriate due to co-morbidity or frailty; life expectancy less than one year due to co-morbidity; previous AVR or TAVI; technically unsuitable for either AVR or TAVI; concomitant coronary artery disease (CAD) requiring                                                                                                                                                                                                                                                                                                                                                                                                                                                                                                                                                                                                                                                                                                                                                                                                                                                                                                                                                                                                                                                                                                                                                                                                                                                                                                                                                                                                                                                                                                                                                                                                                                                                                                                                                                                                                       |

| Study ID                                                                                                                                                                                                                                                                                                                                                                                                                                                                                                                                                                                                                                                                                                                                                                                                                                                                                                                                                                                                                                                                                                                                                          | Risk Level             | Inclusion criteria                                                                                                                                                                                                                                                                                                                                                                                                                                                                                                                                                                                                                                                                                                                    | Exclusion criteria                                                                                                                                                                                                                                                                                                                                                                                                                                                                                                                                                                                                                                                                                                                                    |
|-------------------------------------------------------------------------------------------------------------------------------------------------------------------------------------------------------------------------------------------------------------------------------------------------------------------------------------------------------------------------------------------------------------------------------------------------------------------------------------------------------------------------------------------------------------------------------------------------------------------------------------------------------------------------------------------------------------------------------------------------------------------------------------------------------------------------------------------------------------------------------------------------------------------------------------------------------------------------------------------------------------------------------------------------------------------------------------------------------------------------------------------------------------------|------------------------|---------------------------------------------------------------------------------------------------------------------------------------------------------------------------------------------------------------------------------------------------------------------------------------------------------------------------------------------------------------------------------------------------------------------------------------------------------------------------------------------------------------------------------------------------------------------------------------------------------------------------------------------------------------------------------------------------------------------------------------|-------------------------------------------------------------------------------------------------------------------------------------------------------------------------------------------------------------------------------------------------------------------------------------------------------------------------------------------------------------------------------------------------------------------------------------------------------------------------------------------------------------------------------------------------------------------------------------------------------------------------------------------------------------------------------------------------------------------------------------------------------|
|                                                                                                                                                                                                                                                                                                                                                                                                                                                                                                                                                                                                                                                                                                                                                                                                                                                                                                                                                                                                                                                                                                                                                                   | Any ( $\geq 80$ years) | TAVI deemed to be acceptable treatment options; participant able and willing to give written consent; participant able and willing to comply with all trial requirements.                                                                                                                                                                                                                                                                                                                                                                                                                                                                                                                                                             | revascularisation for which only surgery is considered appropriate; predominant aortic regurgitation; severe mitral regurgitation or need for concomitant surgery other than planned coronary revascularisation.                                                                                                                                                                                                                                                                                                                                                                                                                                                                                                                                      |
| <b>All Risk</b>                                                                                                                                                                                                                                                                                                                                                                                                                                                                                                                                                                                                                                                                                                                                                                                                                                                                                                                                                                                                                                                                                                                                                   |                        |                                                                                                                                                                                                                                                                                                                                                                                                                                                                                                                                                                                                                                                                                                                                       |                                                                                                                                                                                                                                                                                                                                                                                                                                                                                                                                                                                                                                                                                                                                                       |
| <b>NOTION<sup>8</sup></b>                                                                                                                                                                                                                                                                                                                                                                                                                                                                                                                                                                                                                                                                                                                                                                                                                                                                                                                                                                                                                                                                                                                                         | All                    | Patients $\geq 70$ years of age with severe degenerative aortic valve stenosis (defined as an effective orifice area $< 1 \text{ cm}^2$ or indexed for body surface area $< 0.6 \text{ cm}^2/\text{m}^2$ and a mean aortic valve gradient $> 40 \text{ mm Hg}$ or peak systolic velocity $> 4 \text{ m/s}$ ) who were referred for SAVR and also candidates for TAVI; symptomatic patients had to have dyspnea, NYHA functional class II or higher, angina pectoris or cardiac syncope; asymptomatic patients could be included if they had left ventricular posterior wall thickness $\geq 17 \text{ mm}$ , decreasing left ventricular ejection fraction or new-onset atrial fibrillation; expected to survive for more than 1 year | Severe heart valve disease or CAD requiring intervention; previous cardiac surgery; MI or stroke within 30 days; severe renal failure requiring dialysis; pulmonary failure with a FEV1 or diffusion capacity $< 40\%$ of expected                                                                                                                                                                                                                                                                                                                                                                                                                                                                                                                    |
| <b>STACCATO<sup>5</sup></b>                                                                                                                                                                                                                                                                                                                                                                                                                                                                                                                                                                                                                                                                                                                                                                                                                                                                                                                                                                                                                                                                                                                                       | “Operable”             | Significant valvular aortic stenosis (valve area $< 1 \text{ cm}^2$ ); age initially $\geq 70$ later $\geq 75$ years (at the Aarhus University site) or $> 80$ years (at other participating sites); condition accessible both by SAVR and transapical TAVI; expected survival $> 1$ year following successful treatment; patient acceptance of participation in study and follow-up investigations                                                                                                                                                                                                                                                                                                                                   | Coronary artery disease to be treated by PCI or CABG; previous MI or previous PCI within the previous 12 months; previous heart surgery (added as exclusion criteria during study); the need for other heart surgery (such as mitral or tricuspid valve surgery) or emergency surgery (within 24 hours of indication for surgery); unstable cardiac condition (requiring an assist device, inotropes or i.v. nitrates in operating room); ongoing infection requiring antibiotics; stroke within one month; reduced pulmonary function (FEV1 $< 11$ or $< 40\%$ of expected); renal failure to be treated by haemodialysis; allergy to acetylsalicylic acid, clopidogrel, prasugrel or x-ray contract material; kidney failure requiring any dialysis |
| <b>Abbreviations:</b> 6MWT = 6 minute walk test; AR = aortic regurgitation; AVA = aortic valve area; AVR = aortic valve replacement; cm = centimetres; CABG = coronary artery bypass grafting; CAD = coronary artery disease; COPD = chronic obstructive pulmonary disease; DAOH = days alive and out of hospital; DVI = Doppler velocity index; EOA = effective orifice area; FEV1 = forced expiratory volume in one second; HgB = haemoglobin; ICU = intensive care unit; i/v. = intravenous; KCCQ = Kansas City cardiomyopathy questionnaire; LVEF = left ventricular ejection fraction; MACCE = major adverse cardiac and cerebrovascular events; MAE = major adverse events; MDT = multi-disciplinary heart team; MI = myocardial infarction; ml = millilitre; mm = millimetre; NYHA = New York heart association; PCI = percutaneous coronary intervention; Plt = platelets; SAVR = surgical aortic valve replacement; STS = society for thoracic surgeons; TAVI = transcatheter aortic valve implantation; THV = transcatheter heart valve; TIA = transient ischaemic attack; VARC = Valve Academic Research Consortium; WBC = white blood cell; y = years |                        |                                                                                                                                                                                                                                                                                                                                                                                                                                                                                                                                                                                                                                                                                                                                       |                                                                                                                                                                                                                                                                                                                                                                                                                                                                                                                                                                                                                                                                                                                                                       |



SUPPLEMENTARY TABLE S2: PRIMARY AND SECONDARY OUTCOMES

| Study ID                        | Risk Level   | Primary Outcomes                                                               | Secondary Outcomes                                                                                                                                                                                                                                                                                                                                                                                                                                                                                                                                                                                                                                                                                                                                                                                                                                                                                                                                                                                                                                                                                                                                                                                                                                                                                                                                                                                                                                                                                                                                                                                                                          |
|---------------------------------|--------------|--------------------------------------------------------------------------------|---------------------------------------------------------------------------------------------------------------------------------------------------------------------------------------------------------------------------------------------------------------------------------------------------------------------------------------------------------------------------------------------------------------------------------------------------------------------------------------------------------------------------------------------------------------------------------------------------------------------------------------------------------------------------------------------------------------------------------------------------------------------------------------------------------------------------------------------------------------------------------------------------------------------------------------------------------------------------------------------------------------------------------------------------------------------------------------------------------------------------------------------------------------------------------------------------------------------------------------------------------------------------------------------------------------------------------------------------------------------------------------------------------------------------------------------------------------------------------------------------------------------------------------------------------------------------------------------------------------------------------------------|
| <b>High Risk</b>                |              |                                                                                |                                                                                                                                                                                                                                                                                                                                                                                                                                                                                                                                                                                                                                                                                                                                                                                                                                                                                                                                                                                                                                                                                                                                                                                                                                                                                                                                                                                                                                                                                                                                                                                                                                             |
| <b>PARTNER 1A<sup>2</sup></b>   | High         | All-cause mortality at 12 months                                               | Death from cardiovascular causes; functional change in NYHA; repeat hospitalisation due to valve- or procedure-related clinical deterioration; myocardial infarction; stroke; acute kidney injury; vascular complications; bleeding; 6MWT; valve performance (as assessed on echocardiography)                                                                                                                                                                                                                                                                                                                                                                                                                                                                                                                                                                                                                                                                                                                                                                                                                                                                                                                                                                                                                                                                                                                                                                                                                                                                                                                                              |
| <b>US CoreValve<sup>7</sup></b> |              | All-cause mortality at 12 months                                               | Composite outcome (death from any cause, myocardial infarction, any stroke, or reintervention); composite outcome (all-cause mortality or major stroke); all-cause mortality; myocardial infarction; any stroke; reintervention; improvement in symptoms based on NYHA classification; QoL (KCCQ, SF-12); aortic valve gradient; effective orifice area; acute kidney injury; cardiac tamponade; prosthetic valve dysfunction; cardiogenic shock; valve endocarditis; life-threatening, disabling or major bleeding; major vascular complications; cardiac perforation; device migration/valve embolism; permanent pacemaker implantation; 6MWT; aortic regurgitation; aortic valve hospitalisation; cardiovascular death and valve-related death; composite outcome (stroke and TIA); index procedure-related MAEs; length of index hospitalisation; device success (defined as: successful vascular access, delivery and deployment of the device, and successful retrieval of the delivery system, correct position of the device in the proper anatomical location (placement in the annulus with no impedance on device function), intended performance of the prosthetic valve (aortic valve area > 1.2 cm <sup>2</sup> for 26, 29 and 31mm valves, ≥ 0.9 cm <sup>2</sup> for 23mm valve (by echocardiography using the continuity equation) and mean aortic valve gradient < 20 mmHg or peak velocity < 3 m/sec, without moderate or severe prosthetic valve aortic regurgitation) and only one valve implanted in the proper anatomical location); procedural success (defined as device success and absence of in-hospital MACCE); |
| <b>Intermediate Risk</b>        |              |                                                                                |                                                                                                                                                                                                                                                                                                                                                                                                                                                                                                                                                                                                                                                                                                                                                                                                                                                                                                                                                                                                                                                                                                                                                                                                                                                                                                                                                                                                                                                                                                                                                                                                                                             |
| <b>PARTNER 2A<sup>3</sup></b>   | Intermediate | Composite of all-cause mortality or disabling stroke <sup>a</sup> at 24 months | Adjusted Days Alive and Out of Hospital (DAOH); Total AR; 6MWT change from baseline; NYHA Classification; EOA                                                                                                                                                                                                                                                                                                                                                                                                                                                                                                                                                                                                                                                                                                                                                                                                                                                                                                                                                                                                                                                                                                                                                                                                                                                                                                                                                                                                                                                                                                                               |
| <b>SURTAVI<sup>6</sup></b>      |              | Composite of all-cause mortality or disabling stroke <sup>b</sup> at 24 months | Major adverse cardiovascular and cerebrovascular events (death from any cause, MI, all types of strokes, any reintervention); gradient;                                                                                                                                                                                                                                                                                                                                                                                                                                                                                                                                                                                                                                                                                                                                                                                                                                                                                                                                                                                                                                                                                                                                                                                                                                                                                                                                                                                                                                                                                                     |

| Study ID                                                                             | Risk Level                                                     | Primary Outcomes                                                                                                           | Secondary Outcomes                                                                                                                                                                                                                                                                                                                                                                                                                                                                                                                                                                                                                                                                                                                                                                                                                                                                                                                                                                                                                                                                                                           |
|--------------------------------------------------------------------------------------|----------------------------------------------------------------|----------------------------------------------------------------------------------------------------------------------------|------------------------------------------------------------------------------------------------------------------------------------------------------------------------------------------------------------------------------------------------------------------------------------------------------------------------------------------------------------------------------------------------------------------------------------------------------------------------------------------------------------------------------------------------------------------------------------------------------------------------------------------------------------------------------------------------------------------------------------------------------------------------------------------------------------------------------------------------------------------------------------------------------------------------------------------------------------------------------------------------------------------------------------------------------------------------------------------------------------------------------|
|                                                                                      |                                                                |                                                                                                                            | effective orifice area; NYHA; KCCQ; length of index hospitalisation; days alive and out of hospital                                                                                                                                                                                                                                                                                                                                                                                                                                                                                                                                                                                                                                                                                                                                                                                                                                                                                                                                                                                                                          |
| <b>Low Risk</b>                                                                      |                                                                |                                                                                                                            |                                                                                                                                                                                                                                                                                                                                                                                                                                                                                                                                                                                                                                                                                                                                                                                                                                                                                                                                                                                                                                                                                                                              |
| EVOLUT <sup>1</sup>                                                                  | Low                                                            | Composite of all-cause mortality or disabling stroke <sup>b</sup> at 24 months                                             | Transvalvular mean gradient; EOA, NYHA classification; KCCQ score; composite of death, disabling stroke, life-threatening bleed, major vascular complications or stage II/III acute kidney injury; new permanent pacemaker implantation; new endocarditis; valve thrombosis; all stroke (disabling and non-disabling); life-threatening bleeding; valve-related dysfunction requiring repeat procedure                                                                                                                                                                                                                                                                                                                                                                                                                                                                                                                                                                                                                                                                                                                       |
| PARTNER 3 <sup>4</sup>                                                               |                                                                | Composite of all-cause mortality, all stroke or rehospitalisation (valve- or procedure-related, including HF) at 12 months | Stroke; a composite of death or stroke; a composite of death or disabling stroke; all-cause death; all stroke; rehospitalisation (valve- or procedure-related); new-onset atrial fibrillation at 30 days; length of index hospitalisation; ICU days; a poor treatment outcome (composite outcome of death or a low KCCQ overall summary score (KCCQ <45 or KCCQ decrease from baseline of $\geq 10$ points at 30 days); major vascular complications; life threatening/disabling or major bleeding complications; myocardial infarction; acute kidney injury; requirement for renal replacement therapy; new permanent pacemaker implantation; coronary obstruction requiring intervention; NYHA functional class; 6MWT; KCCQ summary score; haemodynamic evaluations; discharge location; days alive and out of hospital; EQ-5DL; SF-36; structural valve deterioration (valve-related dysfunction (mean aortic valve gradient $\geq 20$ mm Hg, EOA $\leq 0.9$ - $1.1$ cm <sup>2</sup> and/or DVI $< 0.35$ m/s, AND/OR moderate or severe prosthetic valve regurgitation) AND requiring repeat procedure (TAVI or Surgery)) |
| <b>Intermediate-High (<math>\geq 70</math>y) or Any (<math>\geq 80</math>y) Risk</b> |                                                                |                                                                                                                            |                                                                                                                                                                                                                                                                                                                                                                                                                                                                                                                                                                                                                                                                                                                                                                                                                                                                                                                                                                                                                                                                                                                              |
| UK TAVI <sup>9</sup>                                                                 | Intermediate-High ( $\geq 70$ years) or Any ( $\geq 80$ years) | All-cause mortality at 12 months                                                                                           | All-cause mortality (at 2, 3, 4 & 5 years); stroke; composite of death from any cause or stroke; conduction disturbance requiring pacing; infective endocarditis; myocardial infarction; re-intervention; vascular complications; major bleeding; renal replacement therapy; quality of life (MLWHF & EQ-5D-5L); functional capacity (NYHA, 6-MWT); echocardiographic measures; costs and cost-utility; all at 30 days and 1-year, with definitions based on VARC2                                                                                                                                                                                                                                                                                                                                                                                                                                                                                                                                                                                                                                                           |
| <b>All Risk</b>                                                                      |                                                                |                                                                                                                            |                                                                                                                                                                                                                                                                                                                                                                                                                                                                                                                                                                                                                                                                                                                                                                                                                                                                                                                                                                                                                                                                                                                              |
| NOTION <sup>8</sup>                                                                  | All                                                            | Composite of all-cause mortality, stroke or MI at 12 months                                                                | The rate of individual components of the composite outcome; the rate of cardiovascular death; prosthesis reintervention; cardiogenic shock; valve endocarditis; conduction abnormalities requiring permanent                                                                                                                                                                                                                                                                                                                                                                                                                                                                                                                                                                                                                                                                                                                                                                                                                                                                                                                 |

| Study ID                                                                                                                                                                                                                                                                                                                                                                                                                                                                                                                                                                                                                                                                                                                                                                                                                                                                                                                                                                                                                                                                                                                                      | Risk Level | Primary Outcomes                                                                              | Secondary Outcomes                                                                                                                                                                                                                                                                                                                                                                                                                                                                 |
|-----------------------------------------------------------------------------------------------------------------------------------------------------------------------------------------------------------------------------------------------------------------------------------------------------------------------------------------------------------------------------------------------------------------------------------------------------------------------------------------------------------------------------------------------------------------------------------------------------------------------------------------------------------------------------------------------------------------------------------------------------------------------------------------------------------------------------------------------------------------------------------------------------------------------------------------------------------------------------------------------------------------------------------------------------------------------------------------------------------------------------------------------|------------|-----------------------------------------------------------------------------------------------|------------------------------------------------------------------------------------------------------------------------------------------------------------------------------------------------------------------------------------------------------------------------------------------------------------------------------------------------------------------------------------------------------------------------------------------------------------------------------------|
|                                                                                                                                                                                                                                                                                                                                                                                                                                                                                                                                                                                                                                                                                                                                                                                                                                                                                                                                                                                                                                                                                                                                               |            |                                                                                               | pacemaker; atrial fibrillation or flutter; and vascular, renal, and bleeding complications after 1 and 12 months. Clinical improvement was assessed according to NYHA functional classification. Echocardiographic outcomes included aortic valve effective orifice area, mean pressure gradient, and degree of total aortic valve regurgitation (graded as none/trace, mild, moderate, and severe) at 3 and 12 months. All outcomes were defined according to VARC-2 definitions. |
| STACCATO <sup>5</sup>                                                                                                                                                                                                                                                                                                                                                                                                                                                                                                                                                                                                                                                                                                                                                                                                                                                                                                                                                                                                                                                                                                                         | “Operable” | Composite of all-cause mortality, major stroke or renal failure requiring dialysis at 30 days | All-cause death, cardiac death, stroke, myocardial infarction, NYHA functional class, SF-36 composite physical and mental functional scores, echocardiographic parameters (aortic valve area, peak aortic valve gradient, aortic valve leakage, LVEF), duration of hospital stay, operation for bleeding; permanent pacemaker treatment; valve performance.                                                                                                                        |
| <p><b>Abbreviations:</b> 6MWT = 6 minute walk test; AR = aortic regurgitation; cm = centimetres; DAOH = days alive and out of hospital; DVI = Doppler velocity index; EOA = effective orifice area; HF = heart failure; ICU = intensive care unit; KCCQ = Kansas City cardiomyopathy questionnaire; LVEF = left ventricular ejection fraction; MACCE = major adverse cardiac and cerebrovascular events; MAE = major adverse events; MI = myocardial infarction; mm = millimetre; NYHA = New York heart association; SAVR = surgical aortic valve replacement; SF-36 = short-form survey 36; TAVI = transcatheter aortic valve implantation; TIA = transient ischaemic attack; VARC = Valve Academic Research Consortium; y = years.</p> <p><sup>a</sup>Defined as a score of <math>\geq 2</math> on the modified Rankin scale (which ranges from 0 (no symptoms) to 6 (death)) at 90 days after the index clinical event.</p> <p><sup>b</sup>Defined as a score of <math>\geq 2</math> on the modified Rankin scale at 90 days AND an increase in at least one modified Rankin scale category from the individual’s pre-stroke baseline.</p> |            |                                                                                               |                                                                                                                                                                                                                                                                                                                                                                                                                                                                                    |

SUPPLEMENTARY TABLE S3: STUDY DEFINITIONS OF DISEASE AND LEVEL OF SURGICAL RISK

| Study ID                        | Disease                                                                           | Definition of Disease                                                                                                                                                                                                                                                                                                                                                                                                                     | Level of Surgical Risk | Definition of Surgical Risk                                                                                                                                         |
|---------------------------------|-----------------------------------------------------------------------------------|-------------------------------------------------------------------------------------------------------------------------------------------------------------------------------------------------------------------------------------------------------------------------------------------------------------------------------------------------------------------------------------------------------------------------------------------|------------------------|---------------------------------------------------------------------------------------------------------------------------------------------------------------------|
| <b>High Risk</b>                |                                                                                   |                                                                                                                                                                                                                                                                                                                                                                                                                                           |                        |                                                                                                                                                                     |
| <b>PARTNER 1A<sup>2</sup></b>   | Symptomatic senile degenerative severe aortic stenosis and cardiac symptoms       | Aortic valve area <0.8 cm <sup>2</sup> (or AVA index <0.5cm <sup>2</sup> /m <sup>2</sup> ) plus either a mean valve gradient of ≥40 mmHg or a peak velocity of ≥4.0 m/s AND NYHA class II or greater                                                                                                                                                                                                                                      | High                   | Risk of death ≥15% by 30 days following surgery and/or STS ≥ 10%                                                                                                    |
| <b>US CoreValve<sup>7</sup></b> | Senile degenerative symptomatic severe aortic stenosis and heart failure symptoms | Initial aortic valve area ≤0.8cm <sup>2</sup> (or AVA index ≤ 0.5 cm <sup>2</sup> /m <sup>2</sup> ) by resting echocardiogram or simultaneous pressure recordings at cardiac catheterisation AND mean gradient >40 mmHg or jet velocity >4.0 m/s by either resting or dobutamine stress echocardiogram, or simultaneous pressure recordings at cardiac catheterisation (either resting or dobutamine stress) AND NYHA class II or greater | High                   | Risk of operative mortality ≥15% by 30 days following surgery; risk of serious irreversible morbidity <50% by 30 days following surgery                             |
| <b>Intermediate Risk</b>        |                                                                                   |                                                                                                                                                                                                                                                                                                                                                                                                                                           |                        |                                                                                                                                                                     |
| <b>PARTNER 2A<sup>3</sup></b>   | Senile degenerative severe aortic stenosis                                        | Initial aortic valve area <0.8 cm <sup>2</sup> or indexed effective orifice area <0.5cm <sup>2</sup> /m <sup>2</sup> plus a mean gradient >40 mmHg or jet velocity >4.0 m/s AND NYHA class II or greater                                                                                                                                                                                                                                  | Intermediate           | STS ≥4.0% (or <4% if determined as intermediate risk by the heart team)                                                                                             |
| <b>SURTAVI<sup>6</sup></b>      | Severe symptomatic severe aortic stenosis                                         | Initial aortic valve area of ≤1.0 cm <sup>2</sup> (or AVA index <0.6cm <sup>2</sup> /m <sup>2</sup> ) AND mean gradient > 40mmHg <b>or</b> peak velocity >4m/s by resting echocardiogram or simultaneous pressure recordings at cardiac catheterisation [or with dobutamine stress, if subject has a LVEF <55%] <b>or</b> velocity                                                                                                        | Intermediate           | Risk of operative mortality ≥3 to <15% by 30 days following surgery; plus consideration of overall clinical status and co-morbidities not measured by the STS score |

| Study ID            | Disease                | Definition of Disease                                                                                                                                                                                                                                                                                                                                                                                                                                                                                                                                                                                                                                                                                                                                                                                                                                                                                                                                                                                                                                                                                                                                                                                                                                                                                                                                                  | Level of Surgical Risk | Definition of Surgical Risk                                                                                   |
|---------------------|------------------------|------------------------------------------------------------------------------------------------------------------------------------------------------------------------------------------------------------------------------------------------------------------------------------------------------------------------------------------------------------------------------------------------------------------------------------------------------------------------------------------------------------------------------------------------------------------------------------------------------------------------------------------------------------------------------------------------------------------------------------------------------------------------------------------------------------------------------------------------------------------------------------------------------------------------------------------------------------------------------------------------------------------------------------------------------------------------------------------------------------------------------------------------------------------------------------------------------------------------------------------------------------------------------------------------------------------------------------------------------------------------|------------------------|---------------------------------------------------------------------------------------------------------------|
|                     |                        | ratio < 0.25 AND NYHA class II or greater                                                                                                                                                                                                                                                                                                                                                                                                                                                                                                                                                                                                                                                                                                                                                                                                                                                                                                                                                                                                                                                                                                                                                                                                                                                                                                                              |                        |                                                                                                               |
| <b>Low Risk</b>     |                        |                                                                                                                                                                                                                                                                                                                                                                                                                                                                                                                                                                                                                                                                                                                                                                                                                                                                                                                                                                                                                                                                                                                                                                                                                                                                                                                                                                        |                        |                                                                                                               |
| EVOLUT <sup>1</sup> | Severe aortic stenosis | <p><u>For symptomatic patients:</u><br/>Aortic valve area <math>\leq 1.0</math> cm<sup>2</sup> (or AVA index <math>\leq 0.6</math> cm<sup>2</sup>/m<sup>2</sup>) OR mean gradient <math>\geq 40</math> mmHg OR maximal aortic valve velocity <math>\geq 4.0</math> m/s by transthoracic echocardiography at rest.</p> <p><u>For asymptomatic patients:</u><br/>i. Very severe aortic stenosis with an aortic valve area <math>\leq 1.0</math> cm<sup>2</sup> (or AVA index <math>\leq 0.6</math> cm<sup>2</sup>/m<sup>2</sup>) AND maximal aortic velocity <math>\geq 5.0</math> m/sec or mean gradient <math>\geq 60</math> mmHg by transthoracic echocardiography at rest<br/>ii. Aortic valve area of <math>\leq 1.0</math> cm<sup>2</sup> (or AVA index of <math>\leq 0.6</math> cm<sup>2</sup>/m<sup>2</sup>) AND a mean gradient <math>\geq 40</math> mmHg or maximal aortic valve velocity <math>\geq 4.0</math> m/s by transthoracic echocardiography at rest AND an exercise tolerance test that demonstrates a limited exercise capacity, abnormal blood pressure response or arrhythmia<br/>iii. Aortic valve area of <math>\leq 1.0</math> cm<sup>2</sup> (or AVA index of <math>\leq 0.6</math> cm<sup>2</sup>/m<sup>2</sup>) AND mean gradient <math>\geq 40</math> mmHg or maximal aortic valve velocity <math>\geq 4.0</math> m/s by transthoracic</p> | Low                    | Risk of death $\leq 3\%$ by 30 days following the procedure per multidisciplinary local heart team assessment |

| Study ID                                                                                                                                                                                                                                                                                                     | Disease                             | Definition of Disease                                                                                                                                                                                                                                                                                                                                                                                                                                                    | Level of Surgical Risk                                         | Definition of Surgical Risk                                                                      |
|--------------------------------------------------------------------------------------------------------------------------------------------------------------------------------------------------------------------------------------------------------------------------------------------------------------|-------------------------------------|--------------------------------------------------------------------------------------------------------------------------------------------------------------------------------------------------------------------------------------------------------------------------------------------------------------------------------------------------------------------------------------------------------------------------------------------------------------------------|----------------------------------------------------------------|--------------------------------------------------------------------------------------------------|
|                                                                                                                                                                                                                                                                                                              |                                     | echocardiography at rest AND a LVEF <50%.                                                                                                                                                                                                                                                                                                                                                                                                                                |                                                                |                                                                                                  |
| <b>PARTNER 3<sup>4</sup></b>                                                                                                                                                                                                                                                                                 | Severe calcific aortic stenosis     | Aortic valve area $\leq 1.0$ cm <sup>2</sup> or AVA index $\leq 0.6$ cm <sup>2</sup> /m <sup>2</sup> AND jet velocity $\geq 4.0$ m/s or mean gradient $\geq 40$ mmHg AND NYHA Functional Class $\geq$ II or exercise tolerance test that demonstrates a limited exercise capacity, abnormal BP response or arrhythmia or asymptomatic with LVEF <50%                                                                                                                     | Low                                                            | STS <4 and low operative mortality risk                                                          |
| <b>Intermediate-High (<math>\geq 70</math>y) or Any (<math>\geq 80</math>y) Risk</b>                                                                                                                                                                                                                         |                                     |                                                                                                                                                                                                                                                                                                                                                                                                                                                                          |                                                                |                                                                                                  |
| <b>UK TAVI<sup>9</sup></b>                                                                                                                                                                                                                                                                                   | Severe symptomatic aortic stenosis  | NR                                                                                                                                                                                                                                                                                                                                                                                                                                                                       | Intermediate-High ( $\geq 70$ years) or Any ( $\geq 80$ years) | NR                                                                                               |
| <b>All Risk</b>                                                                                                                                                                                                                                                                                              |                                     |                                                                                                                                                                                                                                                                                                                                                                                                                                                                          |                                                                |                                                                                                  |
| <b>NOTION<sup>8</sup></b>                                                                                                                                                                                                                                                                                    | Severe degenerative aortic stenosis | Effective orifice area <1 cm <sup>2</sup> or indexed for body surface area <0.6 cm <sup>2</sup> /m <sup>2</sup> and a mean aortic valve gradient >40 mm Hg or peak systolic velocity >4 m/s.<br><br>Symptomatic patients had to have dyspnea, NYHA functional class II or higher, angina pectoris or cardiac syncope.<br><br>Asymptomatic patients could be included if they had left ventricular posterior wall thickness $\geq 17$ mm, decreasing LVEF or new-onset AF | All (High, Intermediate and Low)                               | Regardless of predicted risk of death following surgery; but must be expected to survive >1 year |
| <b>STACCATO<sup>5</sup></b>                                                                                                                                                                                                                                                                                  | Significant aortic stenosis         | Valve area <1cm <sup>2</sup>                                                                                                                                                                                                                                                                                                                                                                                                                                             | “Operable”                                                     | Expected survival >1 year                                                                        |
| <b>Abbreviations:</b> AF = atrial fibrillation; AVA = aortic valve area; BP = blood pressure; cm = centimetre; LVEF = left ventricular ejection fraction; m = metres; NA = not applicable; NR = not reported; NYHA = New York heart association; s = second; STS = society for thoracic surgeons; y = years. |                                     |                                                                                                                                                                                                                                                                                                                                                                                                                                                                          |                                                                |                                                                                                  |

SUPPLEMENTARY TABLE S4: LENGTH OF STAY IN ICU

| Study ID                                                                                                                                                                                             | Treatment Arm | No. of Patients in Treatment Arm | Median Time in ICU (Days) | Median Difference | P-Value |
|------------------------------------------------------------------------------------------------------------------------------------------------------------------------------------------------------|---------------|----------------------------------|---------------------------|-------------------|---------|
| <b>Low Risk</b>                                                                                                                                                                                      |               |                                  |                           |                   |         |
| PARTNER 3 <sup>4</sup>                                                                                                                                                                               | TAVI          | 496                              | 2*                        | -1.0              | NR      |
|                                                                                                                                                                                                      | SAVR          | 454                              | 3*                        |                   |         |
| <b>Intermediate Risk</b>                                                                                                                                                                             |               |                                  |                           |                   |         |
| PARTNER 2A <sup>3</sup>                                                                                                                                                                              | TAVI          | 1011                             | 2                         | -2.0              | <0.001  |
|                                                                                                                                                                                                      | SAVR          | 1021                             | 4                         |                   |         |
| <b>High Risk</b>                                                                                                                                                                                     |               |                                  |                           |                   |         |
| PARTNER 1A <sup>2</sup>                                                                                                                                                                              | TAVI          | 348                              | 3*                        | -2.0              | <0.001  |
|                                                                                                                                                                                                      | SAVR          | 351                              | 5*                        |                   |         |
| <b>Intermediate-High (≥70y) or Any (≥80y) Risk</b>                                                                                                                                                   |               |                                  |                           |                   |         |
| UK TAVI <sup>9</sup>                                                                                                                                                                                 | TAVI          | 449                              | 0                         | -1.0              | NR      |
|                                                                                                                                                                                                      | SAVR          | 419                              | 1                         |                   |         |
| <b>Abbreviations:</b> ICU = intensive care unit; NR = not reported; SAVR = surgical aortic valve replacement; TAVI = transcatheter aortic valve implantation; y = years.<br>*Average measure unclear |               |                                  |                           |                   |         |

SUPPLEMENTARY TABLE S5: LENGTH OF STAY IN HOSPITAL FOLLOWING INDEX PROCEDURE

| Study ID                                                                                                                                                                                                                                                                                       | Treatment Arm | No. of Patients in Treatment Arm | Measure | Time in Hospital (Days) | Error   | Error Type | Difference (Days) | P-Value |
|------------------------------------------------------------------------------------------------------------------------------------------------------------------------------------------------------------------------------------------------------------------------------------------------|---------------|----------------------------------|---------|-------------------------|---------|------------|-------------------|---------|
| <b>Low Risk</b>                                                                                                                                                                                                                                                                                |               |                                  |         |                         |         |            |                   |         |
| PARTNER 3 <sup>4</sup>                                                                                                                                                                                                                                                                         | TAVI          | 496                              | NR      | 3                       | 2 to 3  | 95% CI     | -4.0              | <0.001  |
|                                                                                                                                                                                                                                                                                                | SAVR          | 454                              |         | 7                       | 6 to 8  | 95% CI     |                   |         |
| <b>Intermediate Risk</b>                                                                                                                                                                                                                                                                       |               |                                  |         |                         |         |            |                   |         |
| PARTNER 2A <sup>3</sup>                                                                                                                                                                                                                                                                        | TAVI          | 1011                             | Median  | 6                       | NR      | NR         | -3.0              | <0.001  |
|                                                                                                                                                                                                                                                                                                | SAVR          | 1021                             |         | 9                       | NR      | NR         |                   |         |
| SURTAVI <sup>5</sup>                                                                                                                                                                                                                                                                           | TAVI          | 863                              | Mean    | 5.75                    | 4.85    | SD         | -4.0              | NR      |
|                                                                                                                                                                                                                                                                                                | SAVR          | 795                              |         | 9.75                    | 8.03    | SD         |                   |         |
| <b>High Risk</b>                                                                                                                                                                                                                                                                               |               |                                  |         |                         |         |            |                   |         |
| PARTNER 1A <sup>2</sup>                                                                                                                                                                                                                                                                        | TAVI          | 348                              | NR      | 8                       | NR      | NR         | -4.0              | <0.001  |
|                                                                                                                                                                                                                                                                                                | SAVR          | 351                              |         | 12                      | NR      | NR         |                   |         |
| US CoreValve <sup>7</sup>                                                                                                                                                                                                                                                                      | TAVI          | 391                              | Mean    | 8.0                     | 6.8     | SD         | -4.5              | NR      |
|                                                                                                                                                                                                                                                                                                | SAVR          | 359                              |         | 12.5                    | 10.7    | SD         |                   |         |
| <b>Intermediate-High (≥70y) or Any (≥80y) Risk</b>                                                                                                                                                                                                                                             |               |                                  |         |                         |         |            |                   |         |
| UK TAVI <sup>9</sup>                                                                                                                                                                                                                                                                           | TAVI          | 449                              | Median  | 3                       | 2 to 5  | IQR        | -5.0              | NR      |
|                                                                                                                                                                                                                                                                                                | SAVR          | 419                              |         | 8                       | 6 to 13 | IQR        |                   |         |
| <b>All Risk</b>                                                                                                                                                                                                                                                                                |               |                                  |         |                         |         |            |                   |         |
| NOTION <sup>8</sup>                                                                                                                                                                                                                                                                            | TAVI          | 145                              | Mean    | 8.9                     | 6.2     | SD         | -4.0              | NR      |
|                                                                                                                                                                                                                                                                                                | SAVR          | 135                              |         | 12.9                    | 11.6    | SD         |                   |         |
| STACCATO <sup>5</sup>                                                                                                                                                                                                                                                                          | TAVI          | 34                               | Mean    | 8.8                     | 6.7     | SD         | +1.2              | NS      |
|                                                                                                                                                                                                                                                                                                | SAVR          | 36                               |         | 7.6                     | 2.4     | SD         |                   |         |
| <b>Abbreviations:</b> CI = confidence interval; ICU = intensive care unit; IQR = interquartile range; NR = not reported; NS = not significant (as reported by the authors); SAVR = surgical aortic valve replacement; SD = standard deviation; TAVI = transcatheter aortic valve implantation. |               |                                  |         |                         |         |            |                   |         |



**SUPPLEMENTARY TABLE S6: SUBGROUP ANALYSIS BY LEVEL OF SURGICAL RISK BASED ON STS-PROM SCORES (TAVI ONLY)**

| Outcome                                           | Timepoint | # Studies            | Total # Patients in Low-Intermediate Risk Arm | Total # Patients in High Risk Arm | Risk Ratio | 95% CI (Lower) | 95% CI (Upper) | I <sup>2</sup> (%) | Favours?      |
|---------------------------------------------------|-----------|----------------------|-----------------------------------------------|-----------------------------------|------------|----------------|----------------|--------------------|---------------|
| <b>All-Cause Mortality</b>                        | 1 Year    | 4 <sup>2 6 7 9</sup> | 1368                                          | 691                               | 0.59       | 0.46           | 0.75           | 0                  | Low-Int risk* |
|                                                   | 2 Year    | 1 <sup>7</sup>       | 202                                           | 189                               | 0.51       | 0.34           | 0.76           | NA                 | Low-Int risk* |
|                                                   | 5 Year    | 1 <sup>8</sup>       | 121                                           | 24                                | 0.41       | 0.25           | 0.68           | NA                 | Low-Int risk* |
| <b>Cardiovascular Mortality</b>                   | 1 Year    | 1 <sup>6</sup>       | 611                                           | 253                               | 0.41       | 0.23           | 0.76           | NA                 | Low-Int risk* |
| <b>All Stroke</b>                                 | 1 Year    | 1 <sup>6</sup>       | 611                                           | 253                               | 0.54       | 0.31           | 0.97           | NA                 | Low-Int risk* |
| <b>Major or Disabling Stroke</b>                  | 1 Year    | 1 <sup>6</sup>       | 611                                           | 253                               | 0.65       | 0.26           | 1.66           | NA                 | Low-Int risk  |
| <b>Myocardial Infarction</b>                      | 1 Year    | 1 <sup>6</sup>       | 611                                           | 253                               | 0.53       | 0.20           | 1.41           | NA                 | Low-Int risk  |
| <b>Major Bleeding</b>                             | 1 Year    | 1 <sup>6</sup>       | 611                                           | 253                               | 0.67       | 0.41           | 1.09           | NA                 | Low-Int risk  |
| <b>Major Vascular Complications</b>               | 1 Year    | 1 <sup>6</sup>       | 611                                           | 253                               | 0.52       | 0.31           | 0.87           | NA                 | Low-Int risk* |
| <b>New Permanent Pacemaker Implantation</b>       | 1 Year    | 1 <sup>6</sup>       | 611                                           | 253                               | 1.41       | 1.08           | 1.83           | NA                 | High risk*    |
| <b>Acute Kidney Injury</b>                        | 1 Year    | 1 <sup>6</sup>       | 611                                           | 253                               | 0.55       | 0.19           | 1.58           | NA                 | Low-int risk  |
| <b>New-Onset or Worsening Atrial Fibrillation</b> | 1 Year    | 1 <sup>6</sup>       | 611                                           | 253                               | 0.79       | 0.58           | 1.07           | NA                 | Low-int risk  |
| <b>Endocarditis</b>                               | 1 Year    | 1 <sup>6</sup>       | 611                                           | 253                               | 0.41       | 0.03           | 6.59           | NA                 | Low-int risk  |
| <b>Reintervention or Reoperation</b>              | 1 Year    | 1 <sup>6</sup>       | 611                                           | 253                               | 3.11       | 0.72           | 13.48          | NA                 | High risk     |
| <b>Rehospitalisation</b>                          | 1 Year    | 1 <sup>6</sup>       | 611                                           | 253                               | 0.88       | 0.55           | 1.42           | NA                 | Low-int risk  |

| Outcome                                                                          | Timepoint | # Studies | Total # Patients in Low-Intermediate Risk Arm | Total # Patients in High Risk Arm | Risk Ratio | 95% CI (Lower) | 95% CI (Upper) | I <sup>2</sup> (%) | Favours? |
|----------------------------------------------------------------------------------|-----------|-----------|-----------------------------------------------|-----------------------------------|------------|----------------|----------------|--------------------|----------|
| <b>Abbreviations:</b> # = number; CI = confidence interval; NA = not applicable. |           |           |                                               |                                   |            |                |                |                    |          |
| *Significant result (i.e. 95% CI crosses 1.00)                                   |           |           |                                               |                                   |            |                |                |                    |          |

SUPPLEMENTARY TABLE S7: SUBGROUP ANALYSIS BY ROUTE (TAVI ONLY)

| Outcome                             | Timepoint      | # Studies          | Total # Patients in TF Arm | Total # Patients in non-TF Arm | Risk Ratio | 95% CI (Lower) | 95% CI (Upper) | I <sup>2</sup> (%) | Favours? |
|-------------------------------------|----------------|--------------------|----------------------------|--------------------------------|------------|----------------|----------------|--------------------|----------|
| <b>All-Cause Mortality</b>          | Periprocedural | 1 <sup>7</sup>     | 324                        | 67                             | 1.24       | 0.15           | 10.14          | NA                 | Non-TF   |
|                                     | 30 Day         | 2 <sup>2,3</sup>   | 1019                       | 340                            | 0.51       | 0.29           | 0.88           | 0                  | TF*      |
|                                     | 1 Year         | 2 <sup>2,3</sup>   | 1019                       | 340                            | 0.62       | 0.41           | 0.92           | 60                 | TF*      |
|                                     | 2 Year         | 2 <sup>2,3</sup>   | 1019                       | 340                            | 0.65       | 0.49           | 0.86           | 44                 | TF*      |
|                                     | 5 Year         | 2 <sup>3,7</sup>   | 1099                       | 303                            | 0.82       | 0.66           | 1.03           | 63                 | TF       |
| <b>Cardiovascular Mortality</b>     | 30 Day         | 2 <sup>2,3</sup>   | 1019                       | 340                            | 0.63       | 0.34           | 1.17           | 1                  | TF       |
|                                     | 1 Year         | 2 <sup>2,3</sup>   | 1019                       | 340                            | 0.63       | 0.44           | 0.89           | 0                  | TF*      |
|                                     | 2 Year         | 2 <sup>2,3</sup>   | 1019                       | 340                            | 0.72       | 0.53           | 0.97           | 0                  | TF*      |
|                                     | 5 Year         | 2 <sup>2,3</sup>   | 1019                       | 340                            | 0.77       | 0.69           | 0.85           | 0                  | TF*      |
| <b>All Stroke</b>                   | Periprocedural | 1 <sup>7</sup>     | 324                        | 67                             | 0.76       | 0.22           | 2.64           | NA                 | TF       |
|                                     | 30 Day         | 3 <sup>2,3,7</sup> | 1339                       | 407                            | 0.51       | 0.32           | 0.81           | 7                  | TF*      |
|                                     | 1 Year         | 3 <sup>2,3,7</sup> | 1334                       | 405                            | 0.66       | 0.46           | 0.94           | 0                  | TF*      |
|                                     | 2 Year         | 3 <sup>2,3,7</sup> | 1323                       | 405                            | 0.73       | 0.44           | 1.23           | 45                 | TF       |
|                                     | 5 Year         | 2 <sup>3,7</sup>   | 1099                       | 303                            | 0.80       | 0.60           | 1.09           | 0                  | TF       |
| <b>Major or Disabling Stroke</b>    | Periprocedural | 1 <sup>7</sup>     | 324                        | 67                             | 0.76       | 0.22           | 2.64           | NA                 | TF       |
|                                     | 30 Day         | 3 <sup>2,3,7</sup> | 1343                       | 407                            | 0.47       | 0.28           | 0.80           | 0                  | TF*      |
|                                     | 1 Year         | 3 <sup>2,3,7</sup> | 1335                       | 406                            | 0.60       | 0.39           | 0.93           | 0                  | TF*      |
|                                     | 2 Year         | 2 <sup>3,7</sup>   | 1079                       | 302                            | 0.70       | 0.40           | 1.23           | 18                 | TF       |
|                                     | 5 Year         | 1 <sup>3</sup>     | 775                        | 236                            | 0.67       | 0.43           | 1.04           | NA                 | TF       |
| <b>Myocardial Infarction</b>        | Periprocedural | 1 <sup>7</sup>     | 324                        | 67                             | 1.46       | 0.08           | 28.03          | NA                 | Non-TF   |
|                                     | 30 Day         | 2 <sup>2,3a</sup>  | 1019                       | 340                            | 0.22       | 0.07           | 0.68           | NA                 | TF*      |
|                                     | 1 Year         | 2 <sup>2,3</sup>   | 1019                       | 340                            | 0.45       | 0.21           | 0.99           | 0                  | TF*      |
|                                     | 2 Year         | 2 <sup>2,3a</sup>  | 1019                       | 340                            | 0.53       | 0.27           | 1.07           | NA                 | TF       |
| <b>Major Bleeding</b>               | Periprocedural | 1 <sup>7</sup>     | 324                        | 67                             | 0.36       | 0.21           | 0.62           | NA                 | TF*      |
|                                     | 30 Day         | 2 <sup>2,3</sup>   | 1019                       | 340                            | 0.55       | 0.15           | 1.96           | 90                 | TF       |
|                                     | 1 Year         | 2 <sup>2,3</sup>   | 1019                       | 340                            | 0.73       | 0.19           | 2.78           | 93                 | TF       |
|                                     | 2 Year         | 2 <sup>2,3</sup>   | 1019                       | 340                            | 0.86       | 0.23           | 3.21           | 94                 | TF       |
| <b>Major Vascular Complications</b> | Periprocedural | 1 <sup>7</sup>     | 324                        | 67                             | 4.14       | 0.56           | 30.29          | NA                 | Non-TF   |
|                                     | 30 Day         | 2 <sup>2,3</sup>   | 1019                       | 340                            | 2.07       | 0.84           | 5.07           | 60                 | Non-TF   |
|                                     | 1 Year         | 2 <sup>2,3</sup>   | 1019                       | 340                            | 2.01       | 0.71           | 5.68           | 71                 | Non-TF   |

| Outcome                                    | Timepoint      | # Studies        | Total # Patients in TF Arm | Total # Patients in non-TF Arm | Risk Ratio      | 95% CI (Lower)  | 95% CI (Upper)  | I <sup>2</sup> (%) | Favours? |
|--------------------------------------------|----------------|------------------|----------------------------|--------------------------------|-----------------|-----------------|-----------------|--------------------|----------|
|                                            | 2 Year         | 2 <sup>2,3</sup> | 1019                       | 340                            | 2.00            | 0.66            | 6.12            | 75                 | Non-TF   |
| New Permanent Pacemaker Implantation       | Periprocedural | 1 <sup>7</sup>   | 324                        | 67                             | 1.41            | 0.63            | 3.19            | NA                 | Non-TF   |
|                                            | 30 Day         | 2 <sup>2,3</sup> | 1019                       | 340                            | 0.84            | 0.55            | 1.28            | 0                  | TF       |
|                                            | 1 Year         | 2 <sup>2,3</sup> | 1019                       | 340                            | 0.90            | 0.61            | 1.32            | 0                  | NA       |
|                                            | 2 Year         | 2 <sup>2,3</sup> | 1019                       | 340                            | 0.91            | 0.63            | 1.30            | 0                  | NA       |
| Acute Kidney Injury                        | Periprocedural | 1 <sup>7</sup>   | 324                        | 67                             | 0.50            | 0.22            | 1.16            | NA                 | TF       |
|                                            | 30 Day         | 2 <sup>2,3</sup> | 1019                       | 340                            | 0.56            | 0.02            | 17.15           | 79                 | TF       |
|                                            | 1 Year         | 2 <sup>2,3</sup> | 1019                       | 340                            | 1.47            | 0.03            | 81.53           | 87                 | Non-TF   |
|                                            | 2 Year         | 1 <sup>3</sup>   | 775                        | 236                            | 0.30            | 0.16            | 0.58            | NA                 | TF*      |
| New-Onset or Worsening Atrial Fibrillation | 30 Day         | 2 <sup>2,3</sup> | 1019                       | 340                            | 0.36            | 0.13            | 1.03            | 86                 | TF       |
|                                            | 1 Year         | 2 <sup>2,3</sup> | 1019                       | 340                            | 0.43            | 0.14            | 1.29            | 90                 | TF       |
|                                            | 2 Year         | 1 <sup>3</sup>   | 775                        | 236                            | 0.30            | 0.22            | 0.43            | NA                 | TF*      |
| Endocarditis                               | 30 Day         | 2 <sup>2,3</sup> | 1019                       | 340                            | NC <sup>b</sup> | NC <sup>b</sup> | NC <sup>b</sup> | NA                 | NA       |
|                                            | 1 Year         | 2 <sup>2,3</sup> | 1019                       | 340                            | 1.07            | 0.20            | 5.72            | 0                  | NA       |
|                                            | 2 Year         | 2 <sup>2,3</sup> | 1019                       | 340                            | 2.05            | 0.45            | 9.36            | 0                  | Non-TF   |
| Reintervention or Reoperation              | Periprocedural | 1 <sup>7</sup>   | 324                        | 67                             | 0.21            | 0.01            | 3.26            | NA                 | TF       |
|                                            | 30 Day         | 1 <sup>3</sup>   | 775                        | 236                            | 0.91            | 0.10            | 8.74            | NA                 | NA       |
|                                            | 1 Year         | 1 <sup>3</sup>   | 775                        | 236                            | 0.81            | 0.22            | 3.04            | NA                 | TF       |
|                                            | 2 Year         | 1 <sup>3</sup>   | 775                        | 236                            | 0.69            | 0.21            | 2.20            | NA                 | TF       |
|                                            | 5 Year         | 1 <sup>3</sup>   | 775                        | 236                            | 2.89            | 0.68            | 12.33           | NA                 | Non-TF   |
| Rehospitalisation                          | 30 Day         | 2 <sup>2,3</sup> | 1019                       | 340                            | 0.68            | 0.38            | 1.23            | 21                 | TF       |
|                                            | 1 Year         | 2 <sup>2,3</sup> | 1019                       | 340                            | 0.82            | 0.49            | 1.38            | 65                 | TF       |
|                                            | 2 Year         | 2 <sup>2,3</sup> | 1019                       | 340                            | 0.80            | 0.63            | 1.02            | 0                  | TF       |
|                                            | 5 Year         | 1 <sup>2</sup>   | 244                        | 104                            | 0.82            | 0.64            | 1.05            | NA                 | TF       |

**Abbreviations:** CI = confidence interval; NA = not applicable; NC = not calculable; TF = transfemoral.  
\*Significant result (i.e. 95% CI crosses 1.00)  
<sup>a</sup> 1 study reported no events in either arm and therefore did not contribute to the estimate (not estimable).  
<sup>b</sup> Both studies reported zero events in both arms and therefore no effect estimate could be calculated (not estimable).

SUPPLEMENTARY TABLE S8: SUBGROUP ANALYSIS BY VALVE TYPE

| Outcome                                                                                                                                                                    | Timepoint | Valve Type         | # Studies          | Total # Patients in TAVI Arm | Total # Patients in SAVR Arm | Risk Ratio | 95% CI (Lower) | 95% CI (Upper) | I <sup>2</sup> (%) |
|----------------------------------------------------------------------------------------------------------------------------------------------------------------------------|-----------|--------------------|--------------------|------------------------------|------------------------------|------------|----------------|----------------|--------------------|
| New Permanent Pacemaker Implantation                                                                                                                                       | 30 Days   | Balloon Expandable | 3 <sup>2-4</sup>   | 1855                         | 1826                         | 1.31       | 1.01           | 1.69           | 0                  |
|                                                                                                                                                                            |           | Self-Expanding     | 4 <sup>1,6-8</sup> | 2121                         | 1965                         | 3.62       | 2.43           | 5.39           | 69                 |
|                                                                                                                                                                            | 1 Year    | Balloon Expandable | 3 <sup>2-4</sup>   | 1855                         | 1826                         | 1.21       | 0.96           | 1.52           | 0                  |
|                                                                                                                                                                            |           | Self-Expanding     | 3 <sup>1,7,8</sup> | 1257                         | 1169                         | 3.58       | 1.79           | 7.15           | 84                 |
|                                                                                                                                                                            | 2 Year    | Balloon Expandable | 2 <sup>2,3</sup>   | 1359                         | 1372                         | 1.20       | 0.95           | 1.52           | 0                  |
|                                                                                                                                                                            |           | Self-Expanding     | 2 <sup>7,8</sup>   | 533                          | 493                          | 4.44       | 0.87           | 22.52          | 92                 |
|                                                                                                                                                                            | 5 Year    | Balloon Expandable | 1 <sup>2</sup>     | 348                          | 351                          | 1.23       | 0.72           | 2.09           | NA                 |
|                                                                                                                                                                            |           | Self-Expanding     | 2 <sup>7,8</sup>   | 536                          | 494                          | 3.11       | 1.12           | 8.62           | 88                 |
| <b>Abbreviations:</b> # = number; CI = confidence interval; NA = not applicable; SAVR = surgical aortic valve replacement; TAVI = transcatheter aortic valve implantation. |           |                    |                    |                              |                              |            |                |                |                    |

SUPPLEMENTARY TABLE S9: VALVE DURABILITY

| Study ID                      | Follow-Up Period | Treatment Arm | Definition of SVD                                                                                                                                                                                                                                                      | No. of Patients Experiencing Event | Total No. of Patients | %    | P-Value | Effect Estimate              |
|-------------------------------|------------------|---------------|------------------------------------------------------------------------------------------------------------------------------------------------------------------------------------------------------------------------------------------------------------------------|------------------------------------|-----------------------|------|---------|------------------------------|
| <b>High Risk</b>              |                  |               |                                                                                                                                                                                                                                                                        |                                    |                       |      |         |                              |
| <b>PARTNER 1A<sup>2</sup></b> | 5 Years          | TAVI          | Structural valve deterioration                                                                                                                                                                                                                                         | 0                                  | 348                   | 0    | NR      | NE                           |
|                               |                  | SAVR          |                                                                                                                                                                                                                                                                        | 0                                  | 351                   | 0    |         |                              |
| <b>All Risk</b>               |                  |               |                                                                                                                                                                                                                                                                        |                                    |                       |      |         |                              |
| <b>NOTION<sup>8</sup></b>     | 6 Years          | TAVI          | Moderate/severe haemodynamic structural valve deterioration (mean gradient $\geq 20$ mm Hg, increase in mean gradient $\geq 10$ mm Hg from 3 months post-procedure or > mild intraprosthetic aortic regurgitation either new or worsening from 3 months post-procedure | 7                                  | 139                   | 4.8  | <0.0001 | RR 0.21, 95% CI 0.10 to 0.46 |
|                               |                  | SAVR          |                                                                                                                                                                                                                                                                        | 32                                 | 135                   | 24.0 |         |                              |
|                               |                  | TAVI          | Bioprosthetic valve dysfunction defined as as one or more of the following: structural valve deterioration, non-structural valve deterioration, bioprosthetic valve thrombosis or endocarditis.                                                                        | 78                                 | 139                   | 56.1 | 0.073   | RR 0.84, 95% CI 0.70 to 1.02 |
|                               |                  | SAVR          |                                                                                                                                                                                                                                                                        | 90                                 | 135                   | 66.7 |         |                              |
|                               |                  | TAVI          | Non-structural valve deterioration defined as defined as moderate/severe                                                                                                                                                                                               | 75                                 | 139                   | 54.0 | 0.52    | RR 0.93, 95% CI 0.76 to 1.15 |
|                               |                  | SAVR          |                                                                                                                                                                                                                                                                        | 78                                 | 135                   | 57.8 |         |                              |

| Study ID                                                                                                                                                                                                                                                                                                                                       | Follow-Up Period | Treatment Arm | Definition of SVD                                                                                                                                                                                                                                                                                                                                                                                                                                                 | No. of Patients Experiencing Event | Total No. of Patients | %   | P-Value | Effect Estimate              |
|------------------------------------------------------------------------------------------------------------------------------------------------------------------------------------------------------------------------------------------------------------------------------------------------------------------------------------------------|------------------|---------------|-------------------------------------------------------------------------------------------------------------------------------------------------------------------------------------------------------------------------------------------------------------------------------------------------------------------------------------------------------------------------------------------------------------------------------------------------------------------|------------------------------------|-----------------------|-----|---------|------------------------------|
|                                                                                                                                                                                                                                                                                                                                                |                  |               | PPM at 3 months or moderate/severe PVL                                                                                                                                                                                                                                                                                                                                                                                                                            |                                    |                       |     |         |                              |
|                                                                                                                                                                                                                                                                                                                                                |                  | TAVI          | Bioprosthetic valve failure defined as at least 1 of the following: valve-related death (death caused by BVD or sudden unexplained death following diagnosis of BVD), aortic valve reintervention (TAVR or SAVR following diagnosis of BVD), or severe hemodynamic SVD (mean gradient $\geq 40$ mm Hg, increase in mean gradient $\geq 20$ mm Hg from 3 months post-procedure, or severe intraprosthetic AR either new or worsening from 3 months post-procedure) | 10                                 | 139                   | 7.5 | 0.89    | RR 1.08, 95% CI 0.45 to 2.57 |
|                                                                                                                                                                                                                                                                                                                                                |                  | SAVR          |                                                                                                                                                                                                                                                                                                                                                                                                                                                                   | 9                                  | 135                   | 6.7 |         |                              |
| <b>Abbreviations:</b> AR = aortic regurgitation; BVD = bioprosthetic valve dysfunction; NE = not estimable; NR = not reported; PPM = patient-prosthesis mismatch; PVL = paravalvular leakage; RR = risk ratio; SAVR = surgical aortic valve replacement; SVD = structural valve deterioration; TAVI = transcatheter aortic valve implantation. |                  |               |                                                                                                                                                                                                                                                                                                                                                                                                                                                                   |                                    |                       |     |         |                              |

## SUPPLEMENTARY FIGURE S1: FOREST PLOTS FOR MAJOR OR DISABLING STROKE

### a. 30 Days

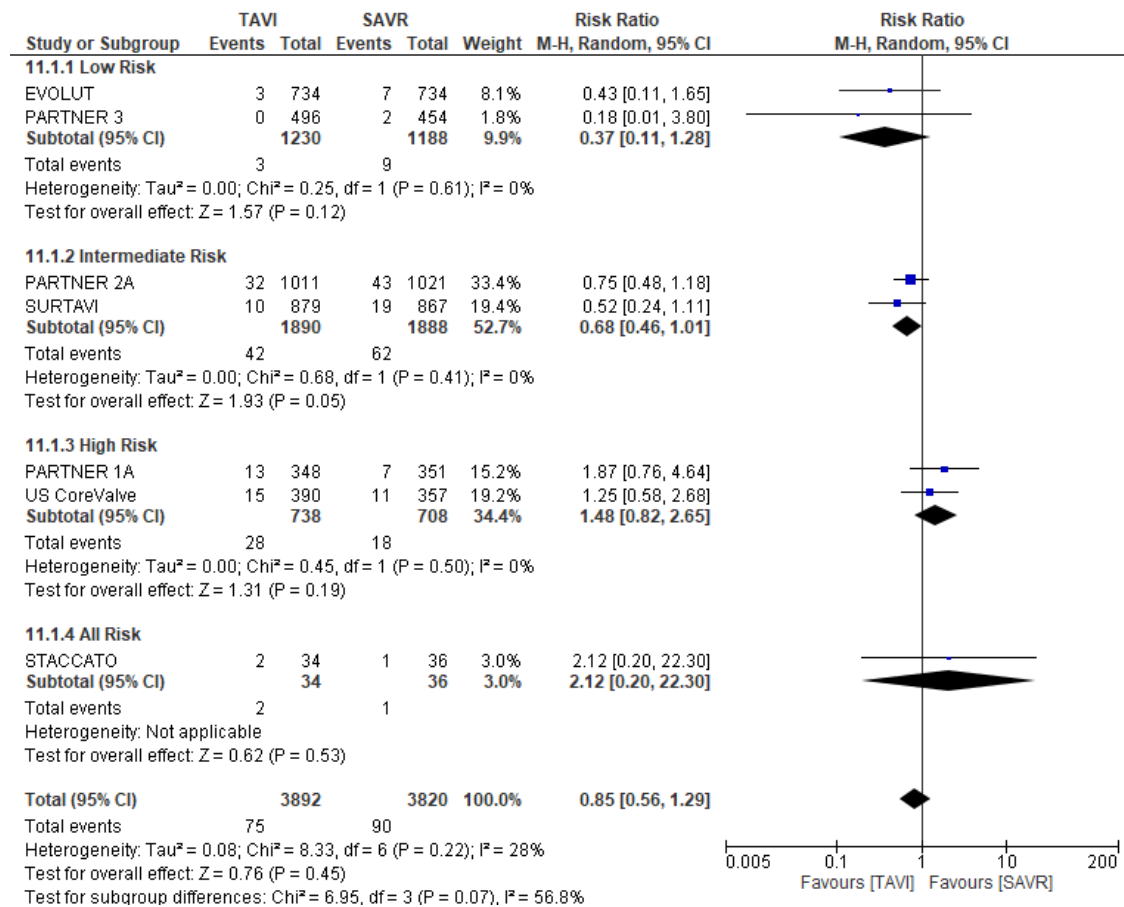



## b. 1 Year

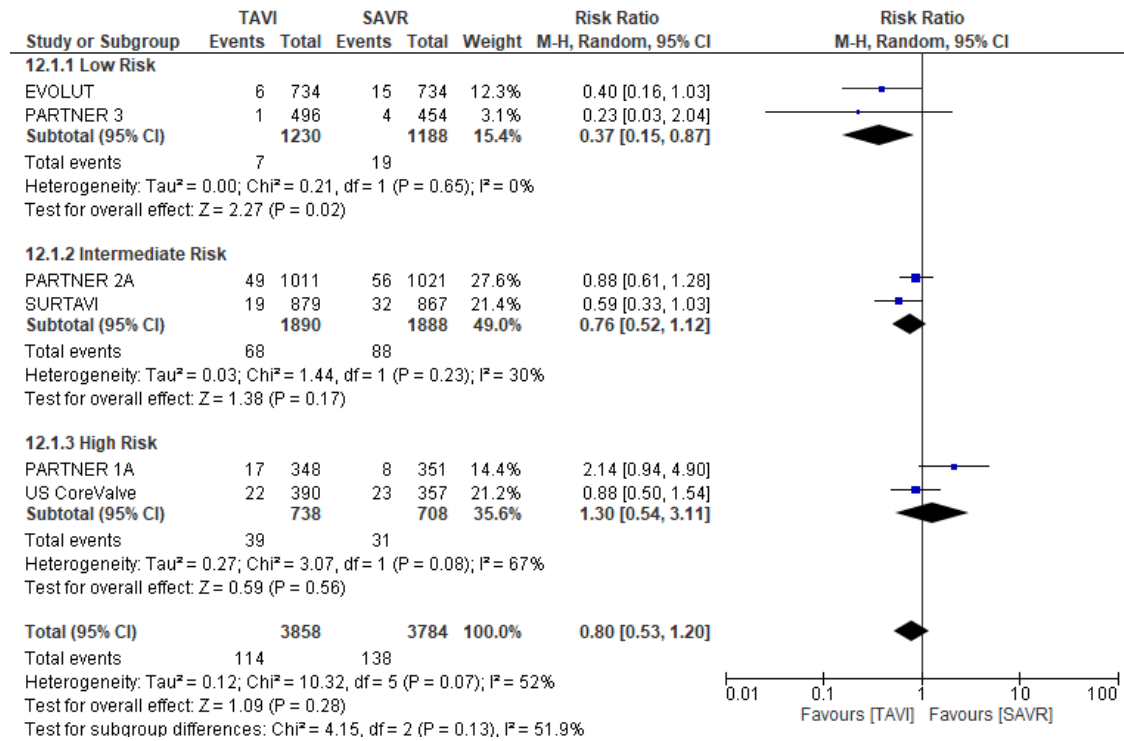

## c. 2 Years

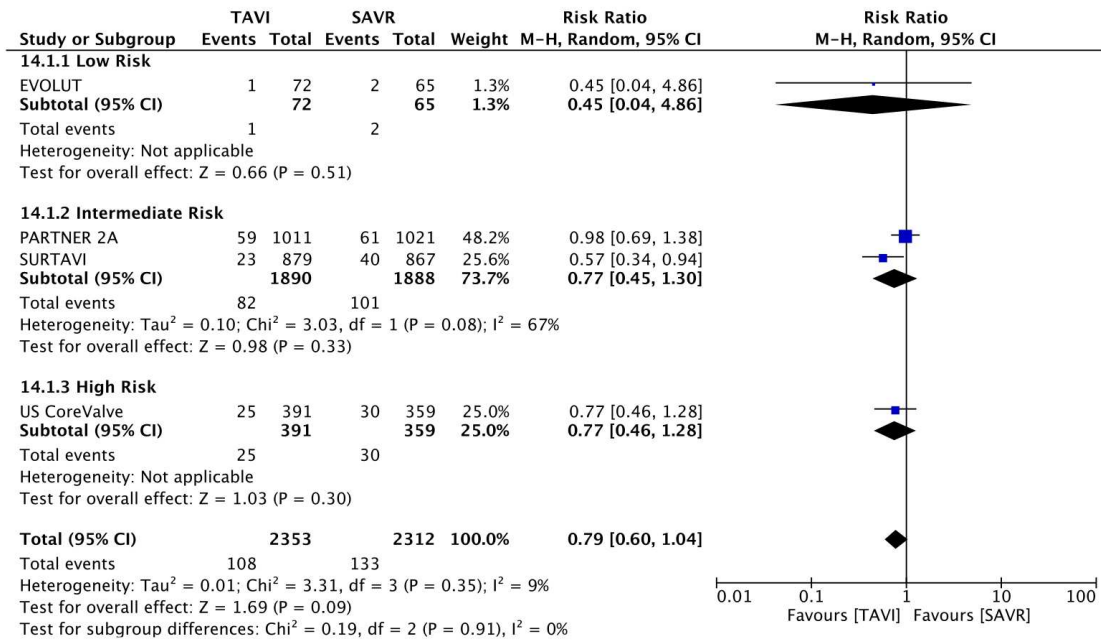

## d. 5 Years

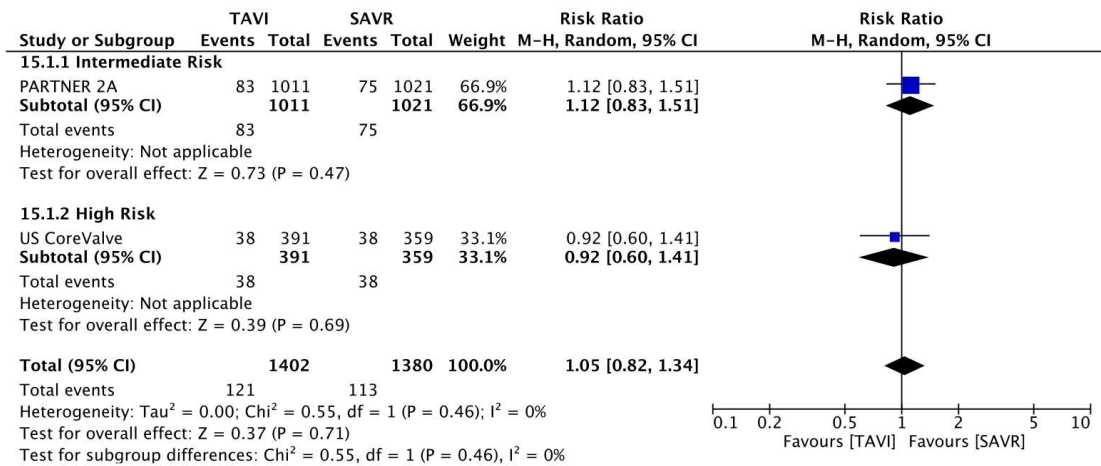

## SUPPLEMENTARY FIGURE S2: FOREST PLOTS FOR MYOCARDIAL INFARCTION

## a. Periprocedural

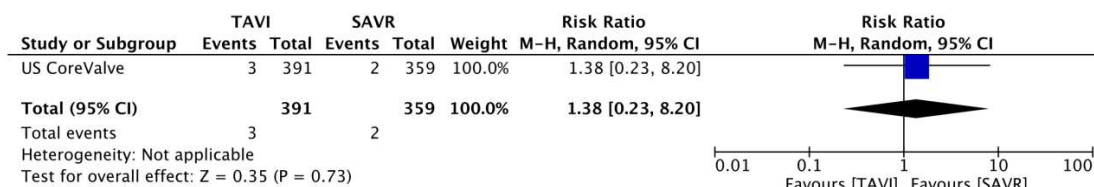

## b. 30 Days

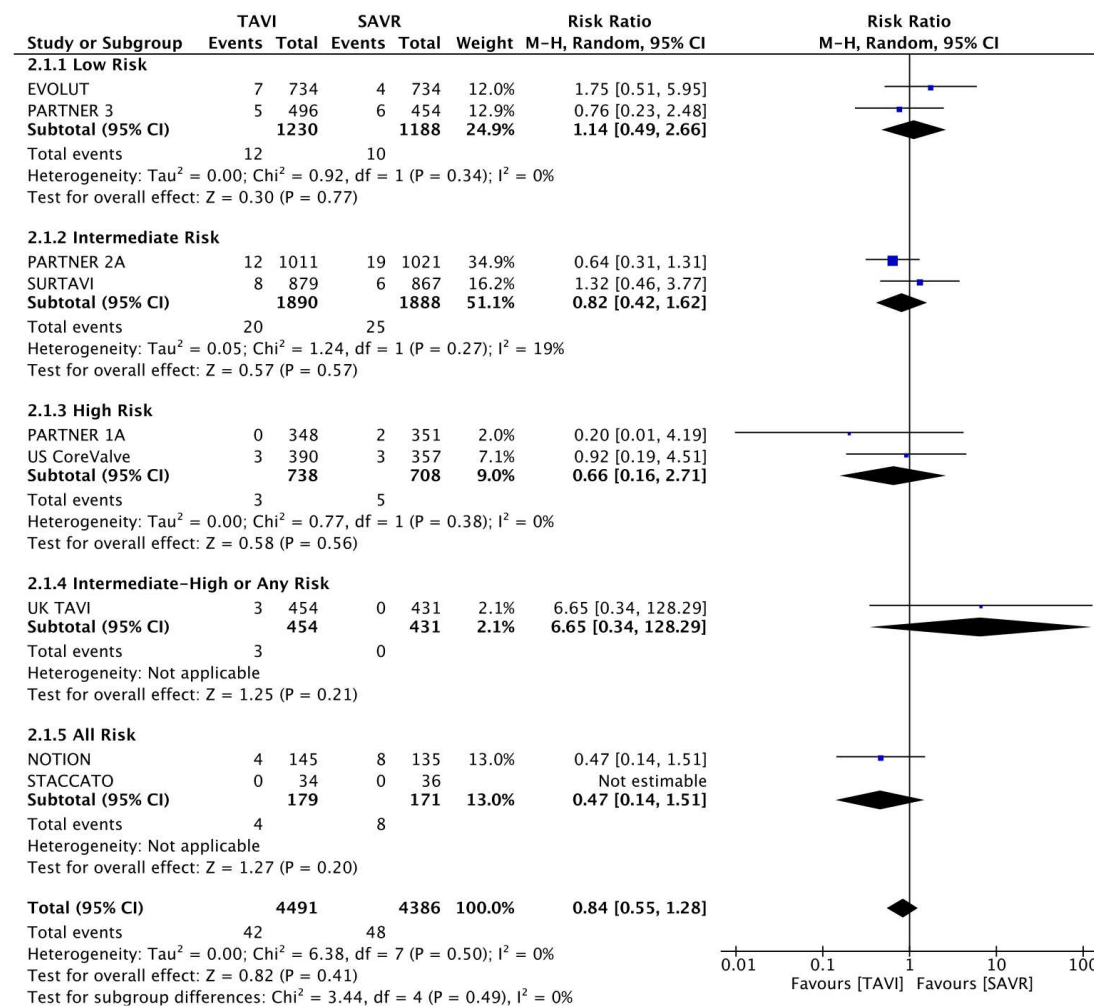

## c. 1 Year

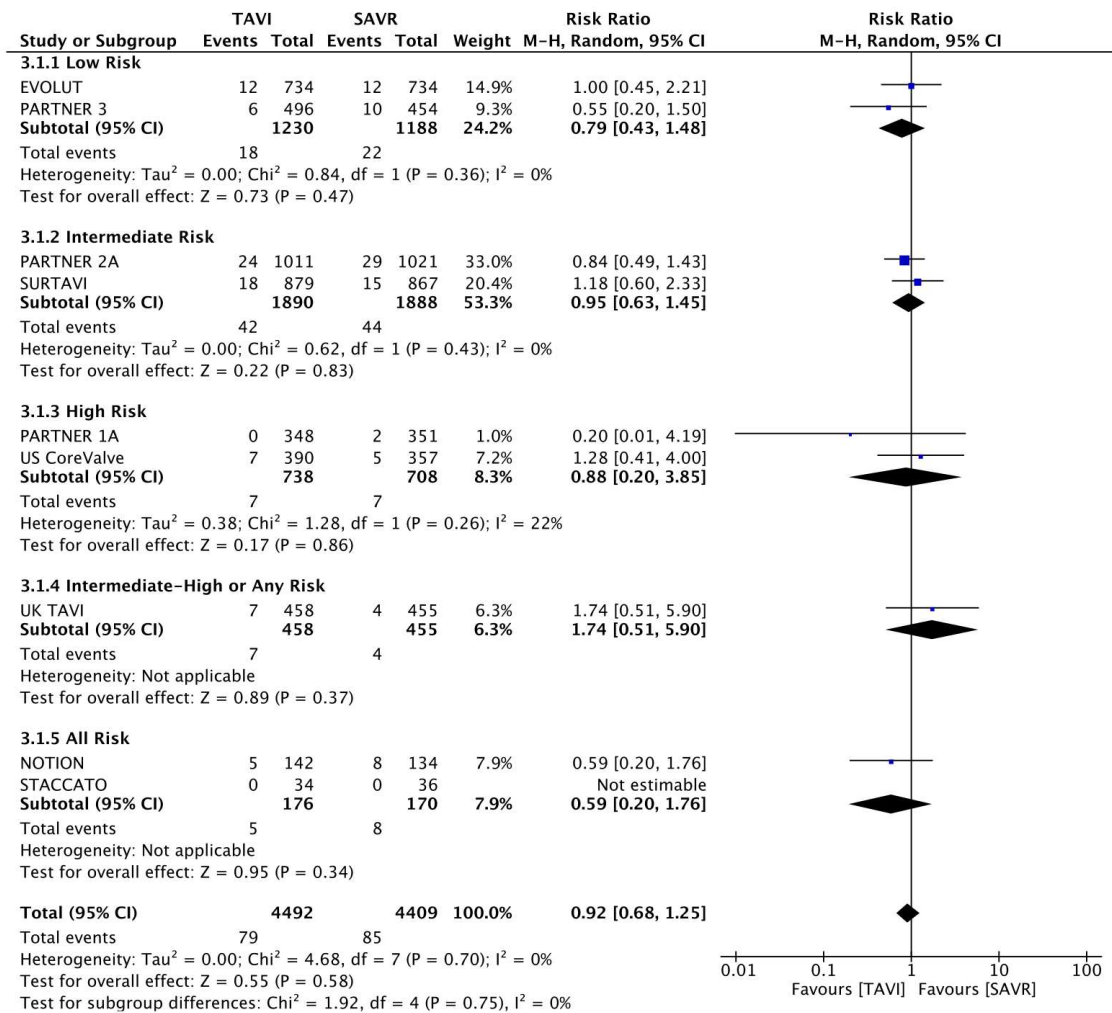

## d. 2 Years

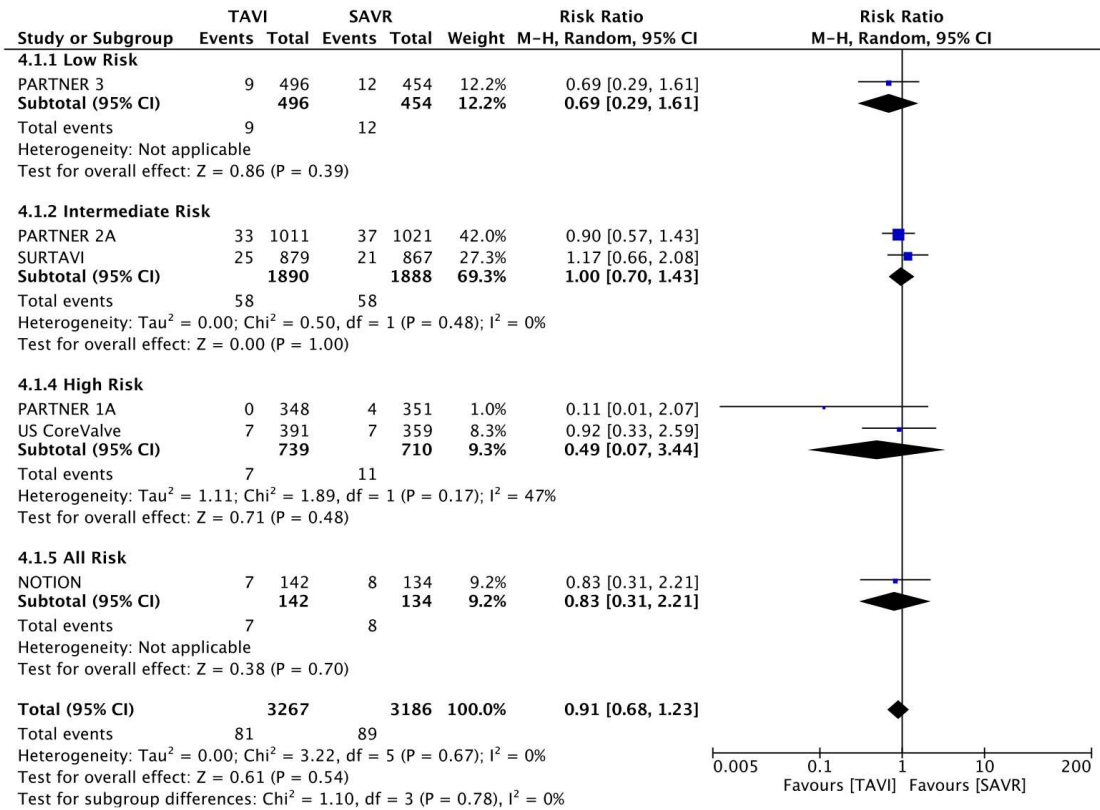

## e. 5 Years

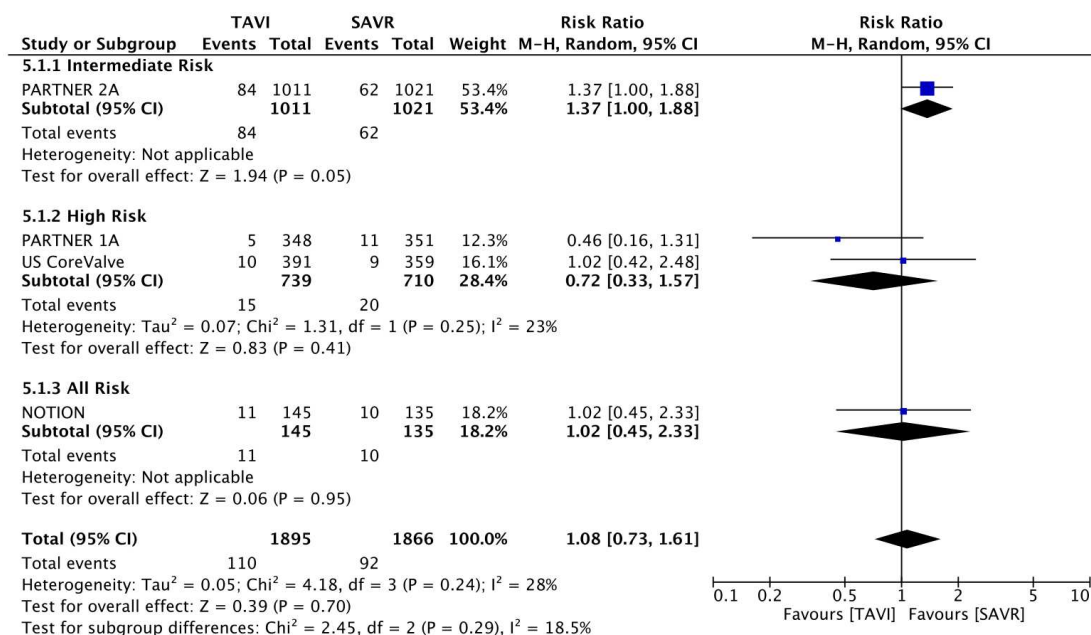

## SUPPLEMENTARY FIGURE S3: FOREST PLOTS FOR MAJOR BLEEDING

## a. Periprocedural or In-Hospital

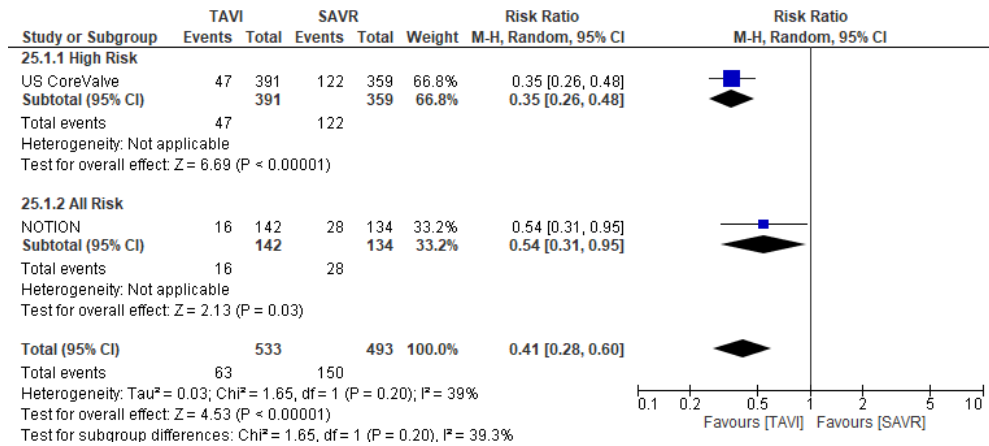

## b. 30 Days

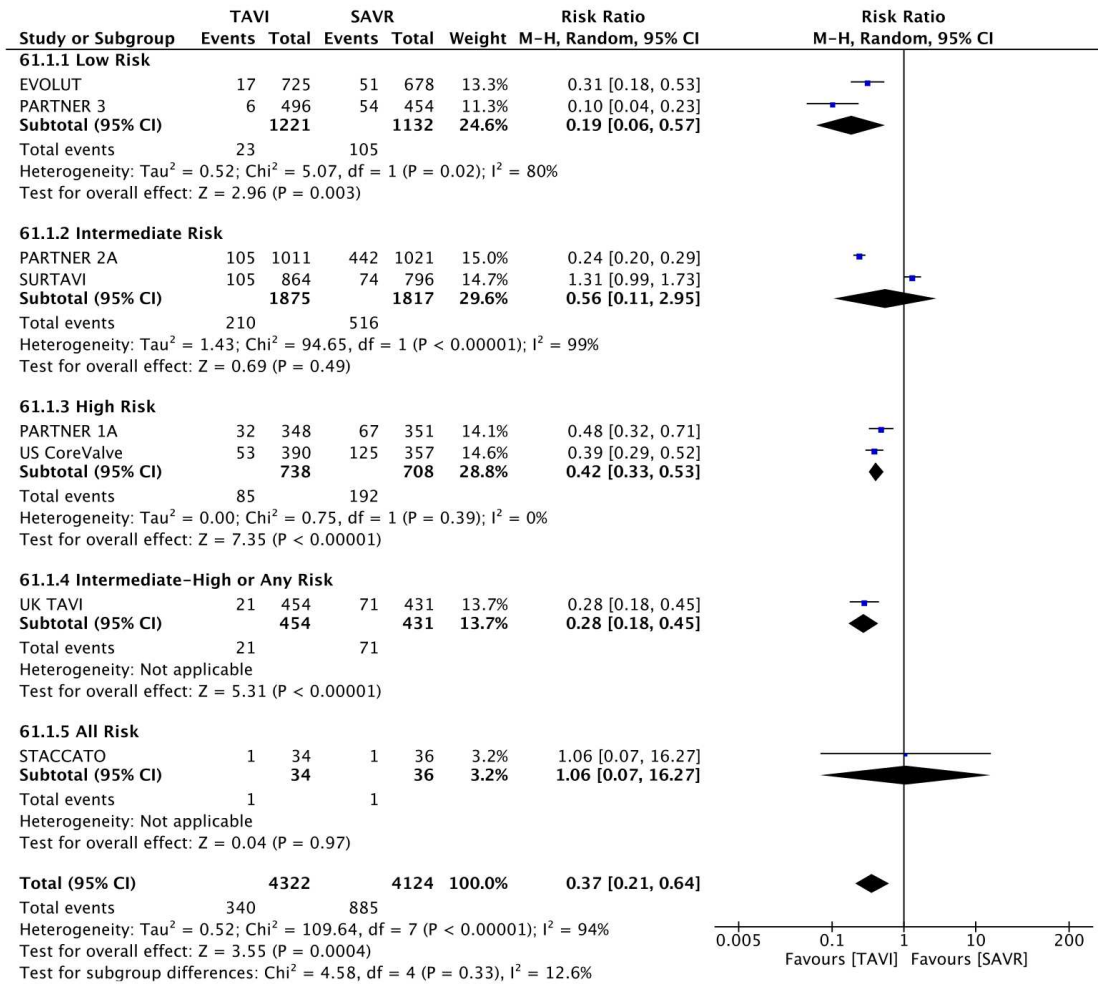



## c. 1 Year

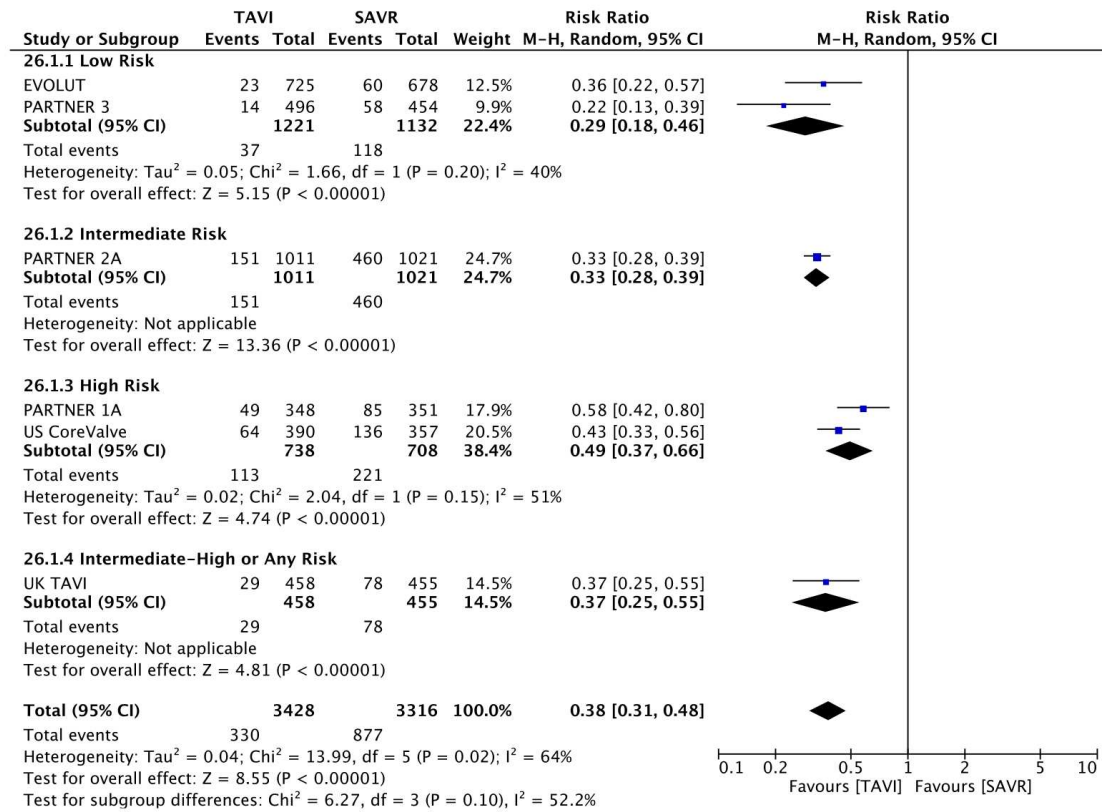

## d. 2 Years

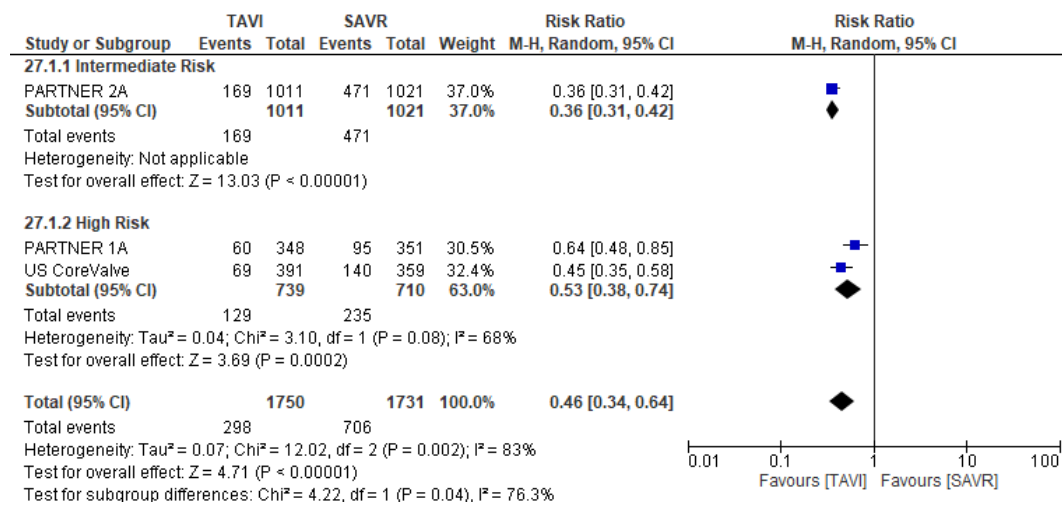

## e. 5 Years

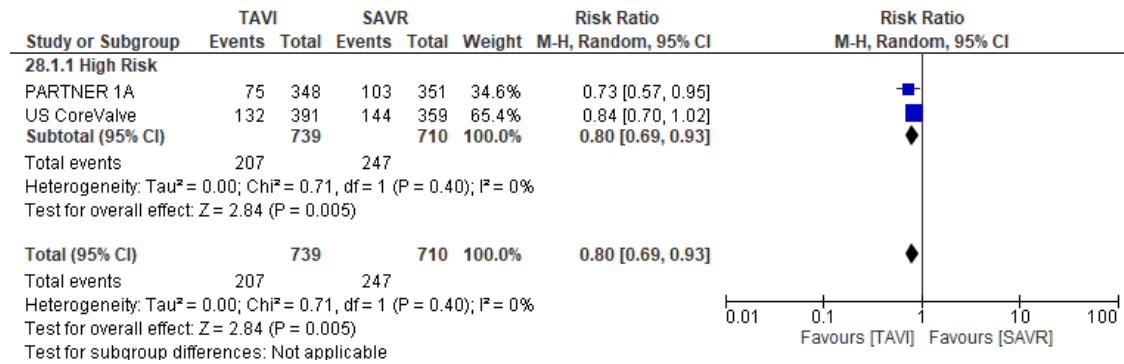

### SUPPLEMENTARY FIGURE S4: SENSITIVITY ANALYSIS FOR MAJOR BLEEDING AT 1 YEAR

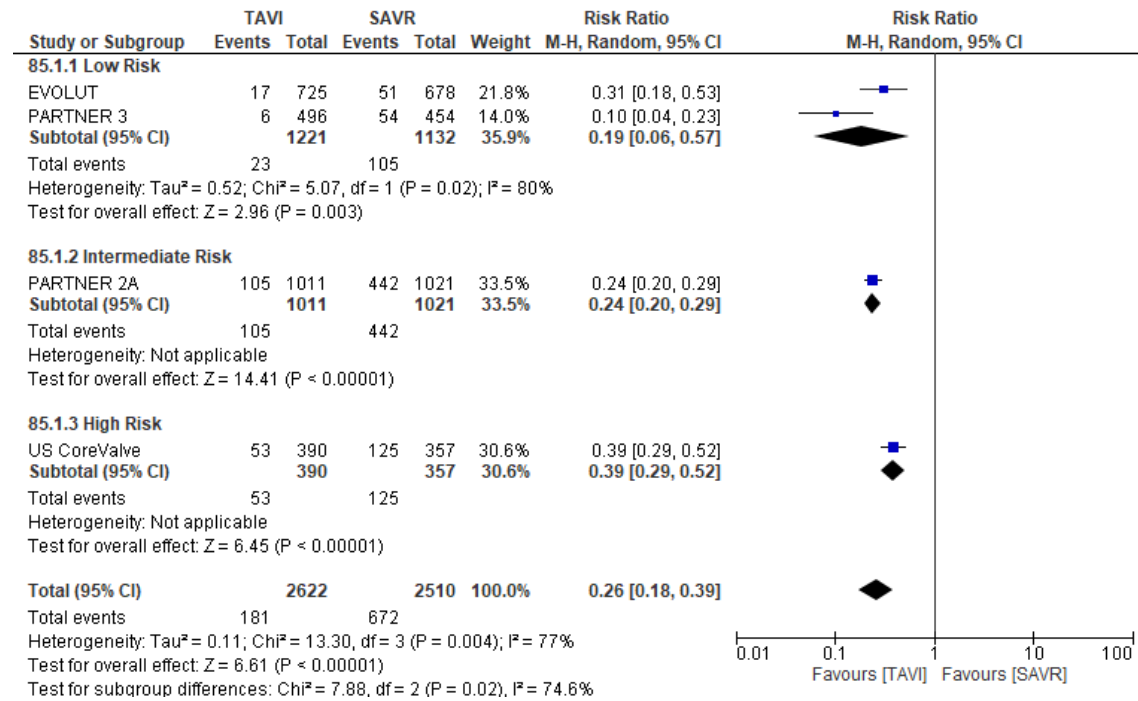

## SUPPLEMENTARY FIGURE S5: FOREST PLOTS FOR MAJOR VASCULAR COMPLICATIONS

### a. Periprocedural or In-Hospital

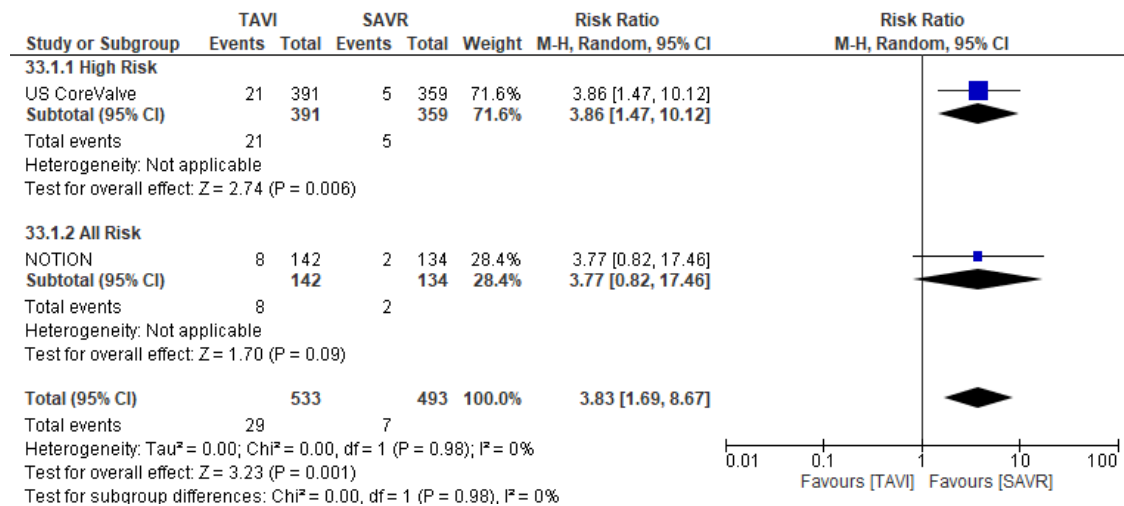

### b. 30 Days

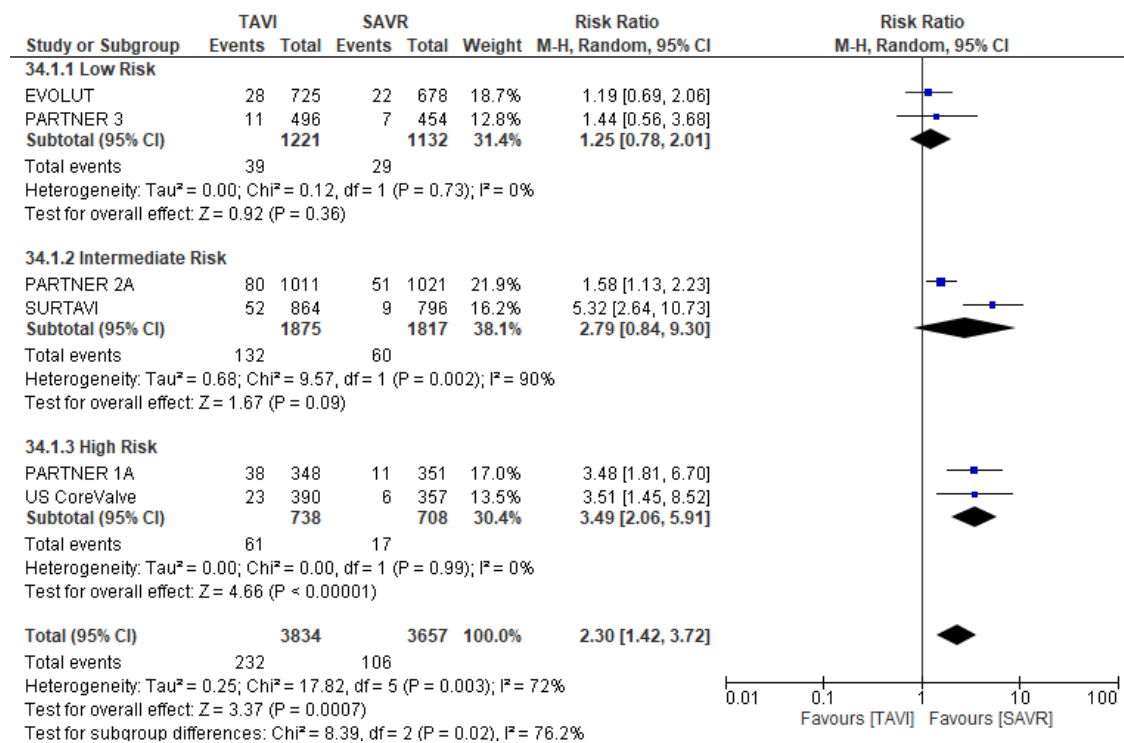

## c. 1 Year

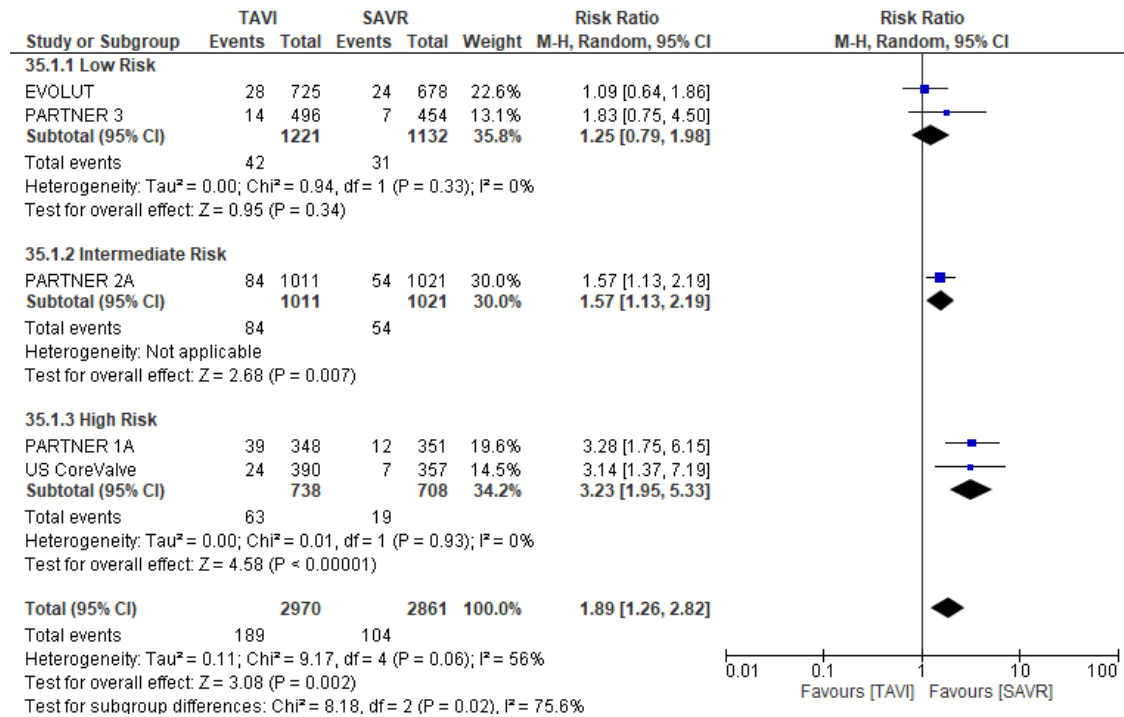

## d. 2 Years

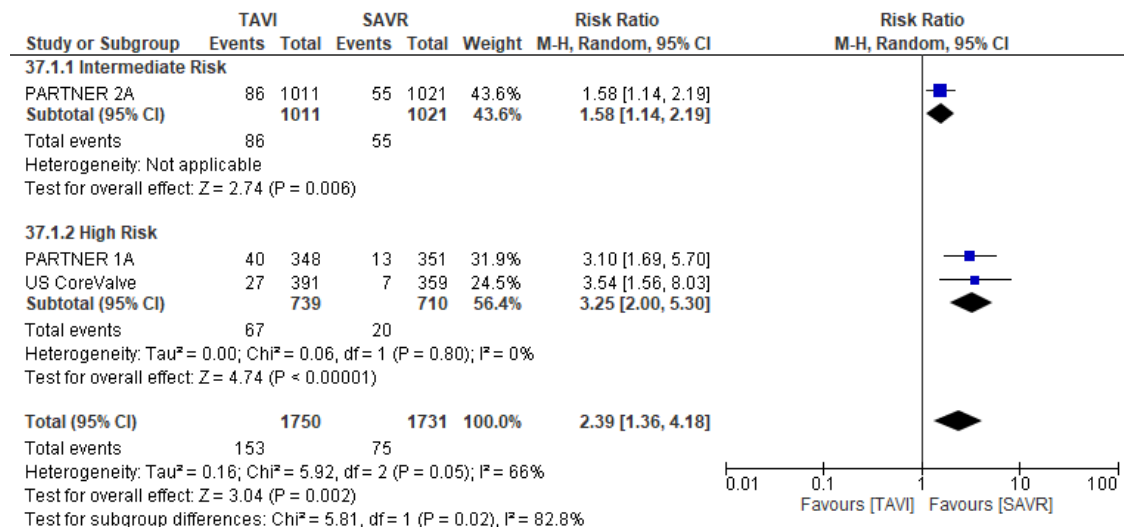

## e. 5 Years

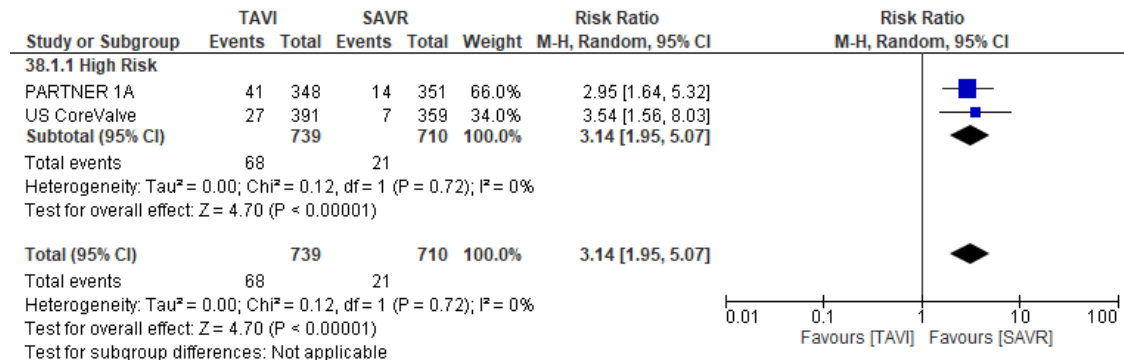

## SUPPLEMENTARY FIGURE S6: FOREST PLOTS FOR NEW PERMANENT PACEMAKER IMPLANTATION

### a. Periprocedural

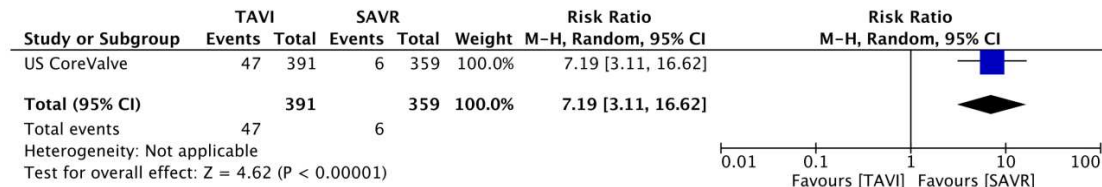

### b. 30 Days

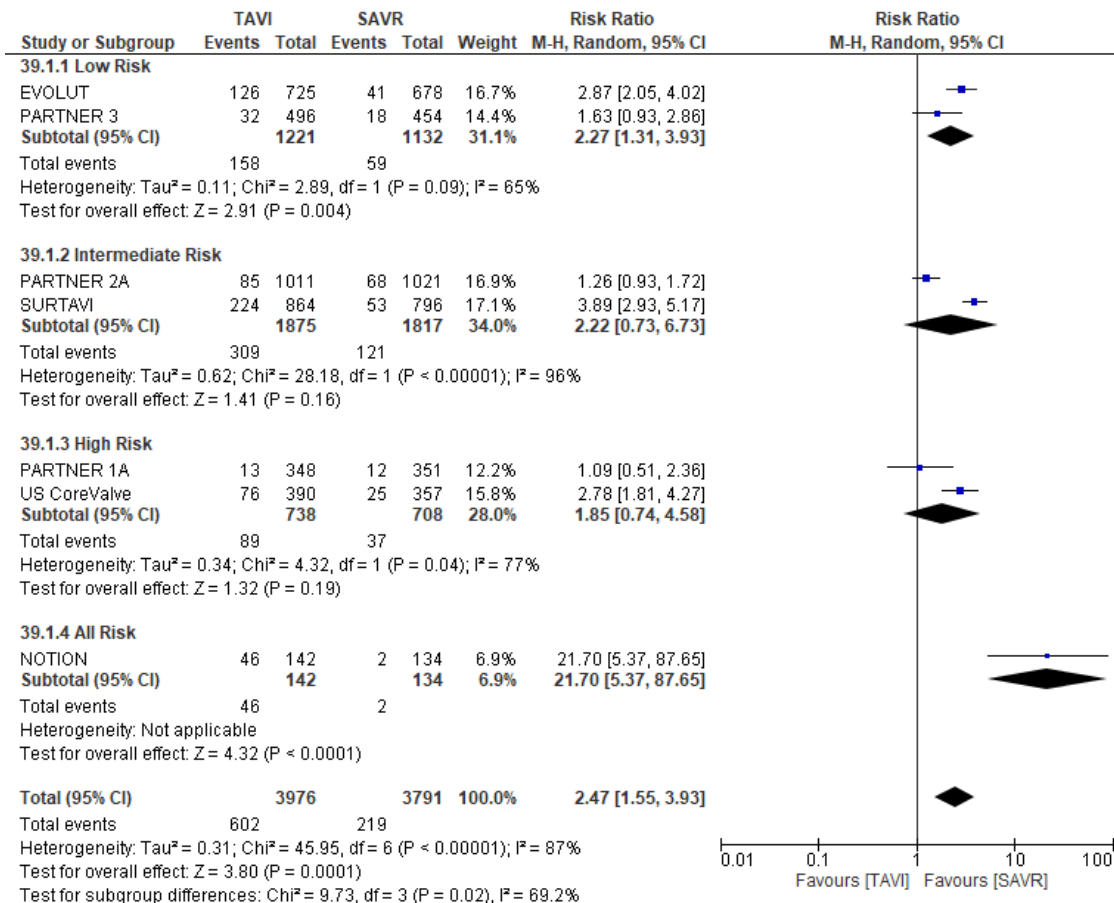

## c. 1 Year

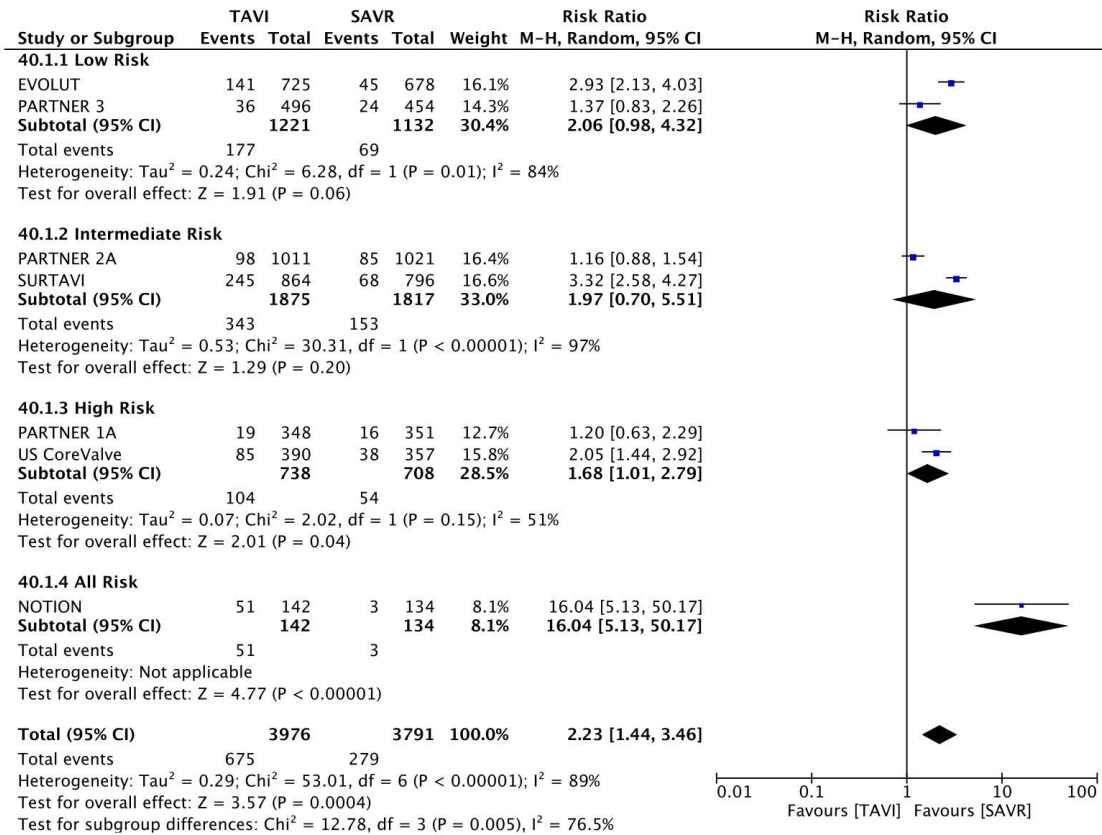



## d. 2 Years

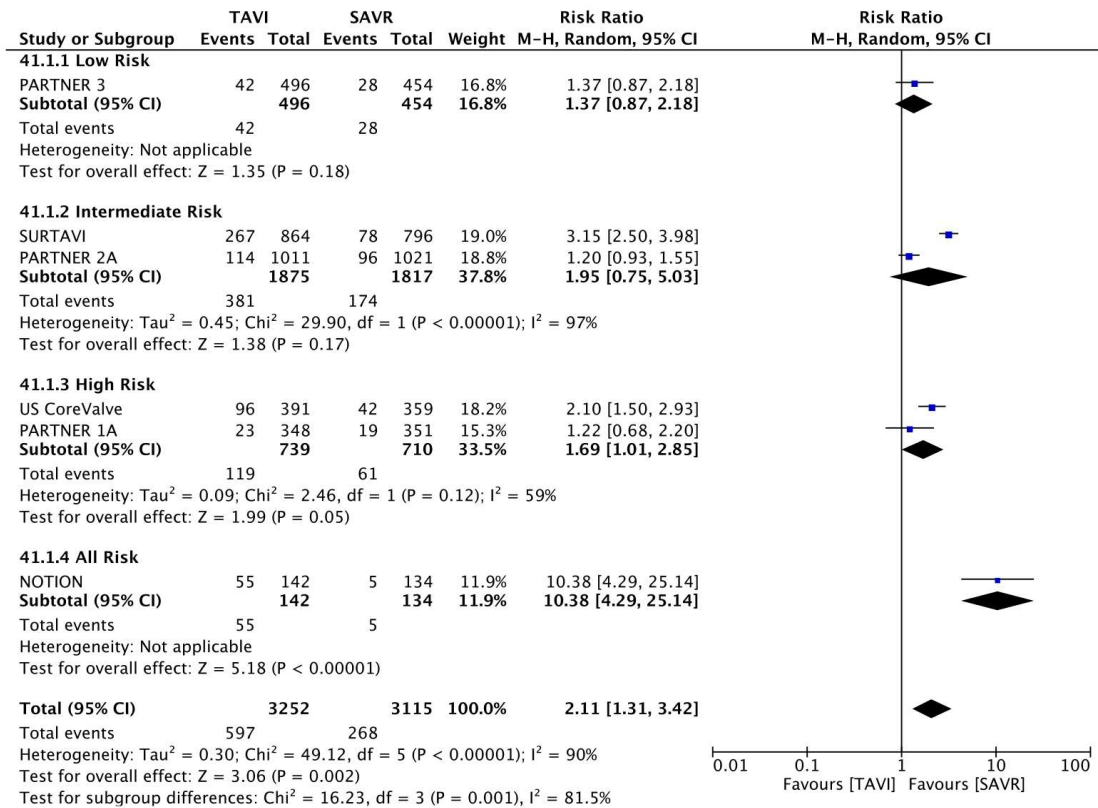

## e. 5 Years

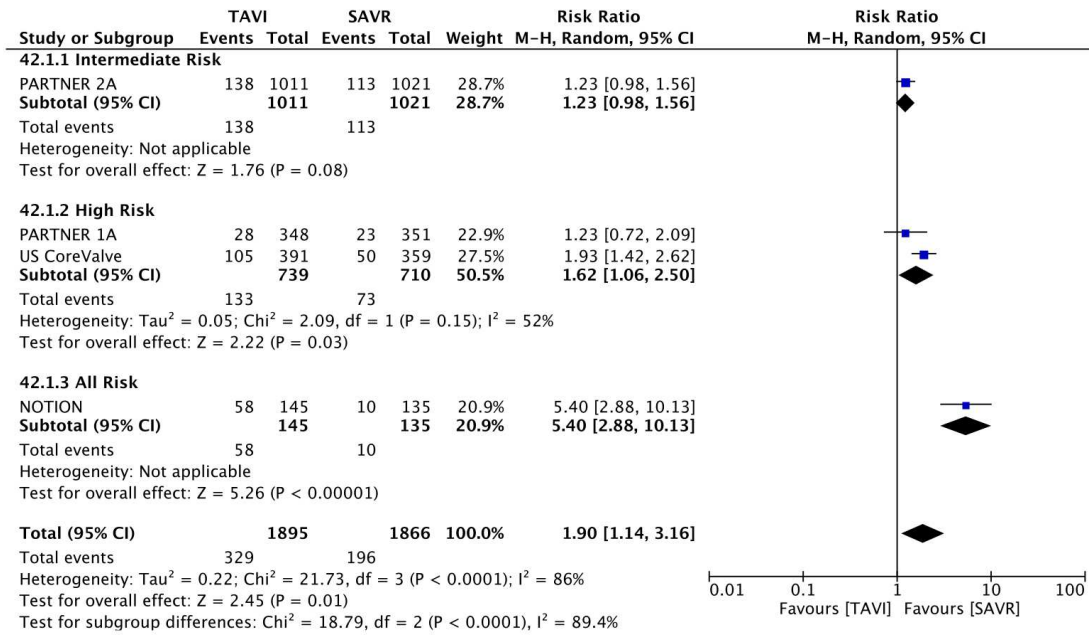

## SUPPLEMENTARY FIGURE S7: FOREST PLOTS FOR ACUTE KIDNEY INJURY

## a. Periprocedural or In-Hospital

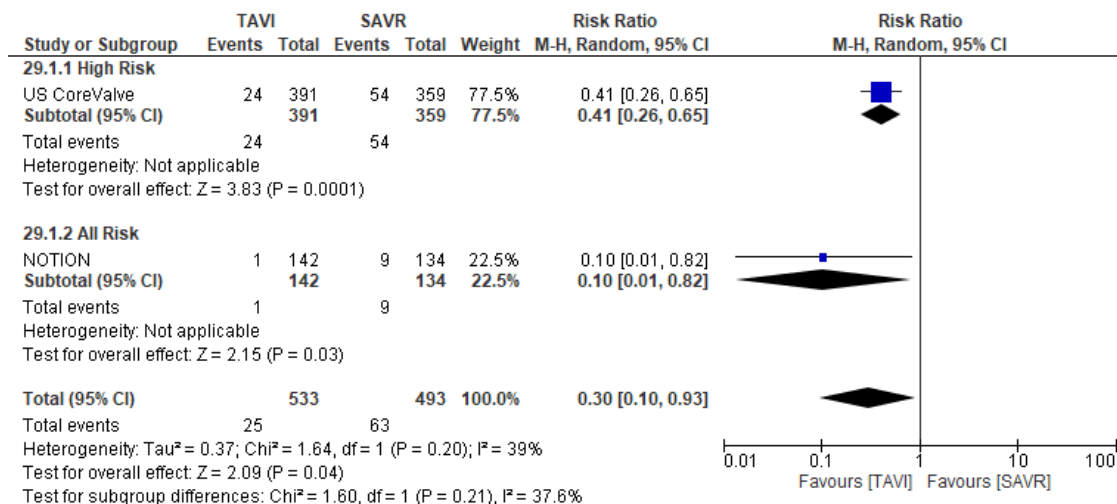

## b. 30 Days

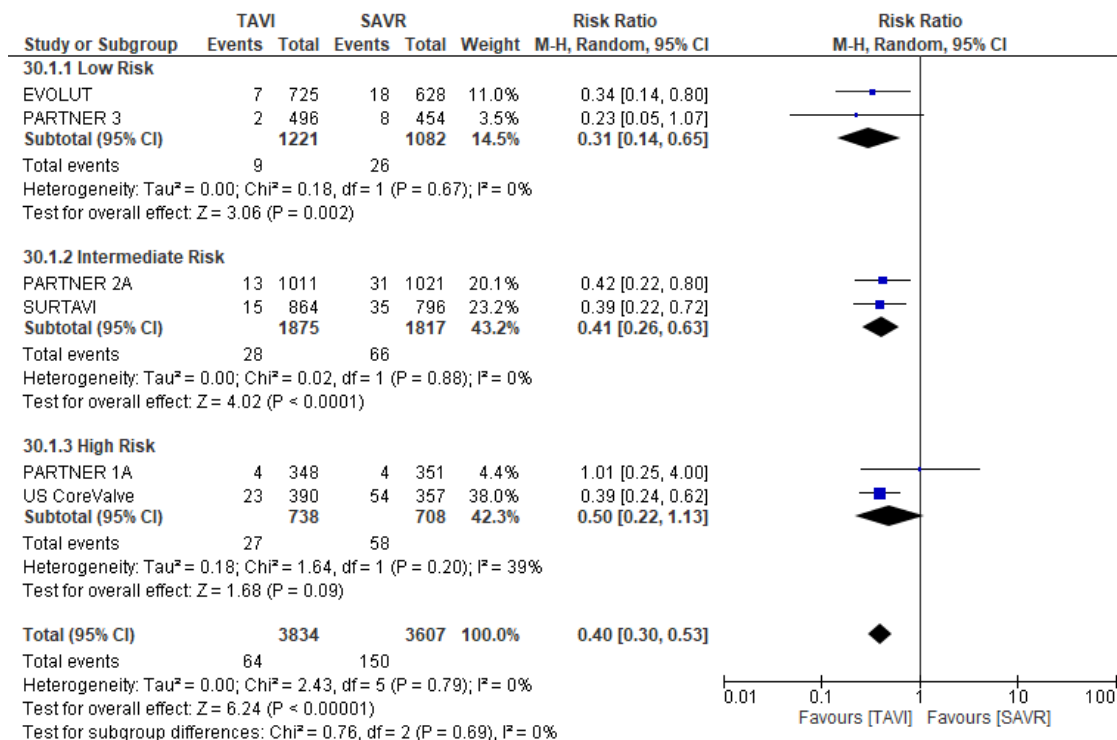

## c. 1 Year

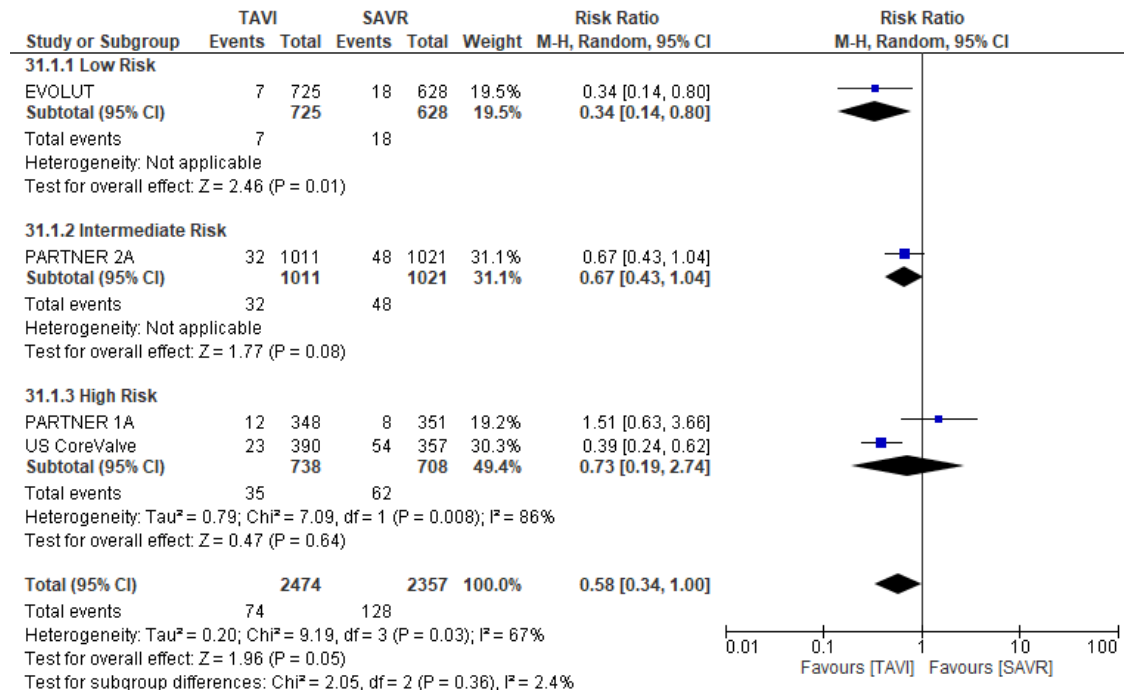

## d. 2 Years

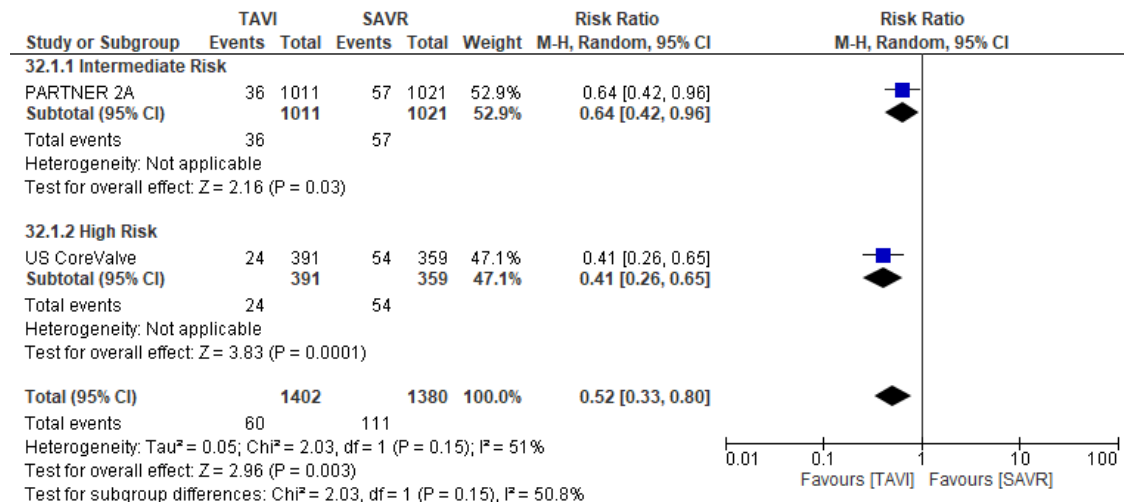

## SUPPLEMENTARY FIGURE S8: FOREST PLOTS FOR NEW-ONSET OR WORSENING ATRIAL FIBRILLATION

### a. Periprocedural or In-Hospital

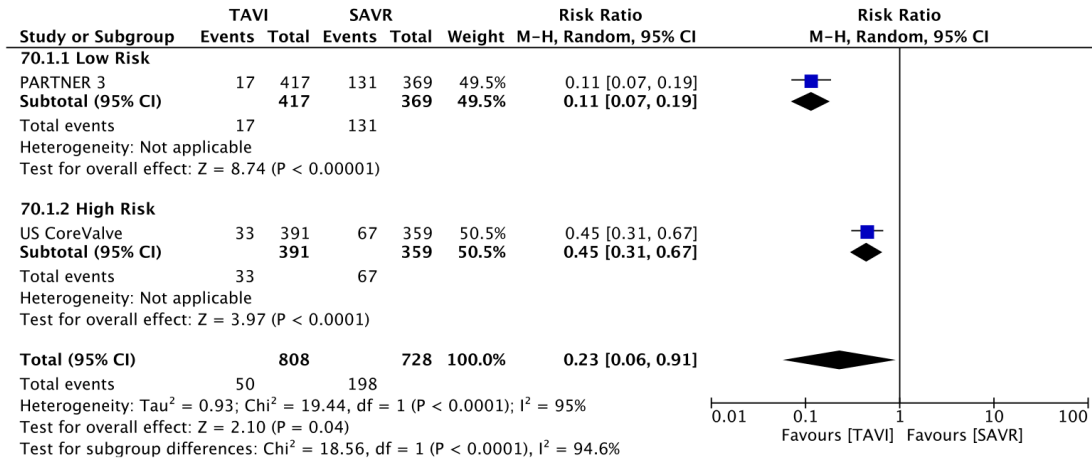

## b. 30 Days

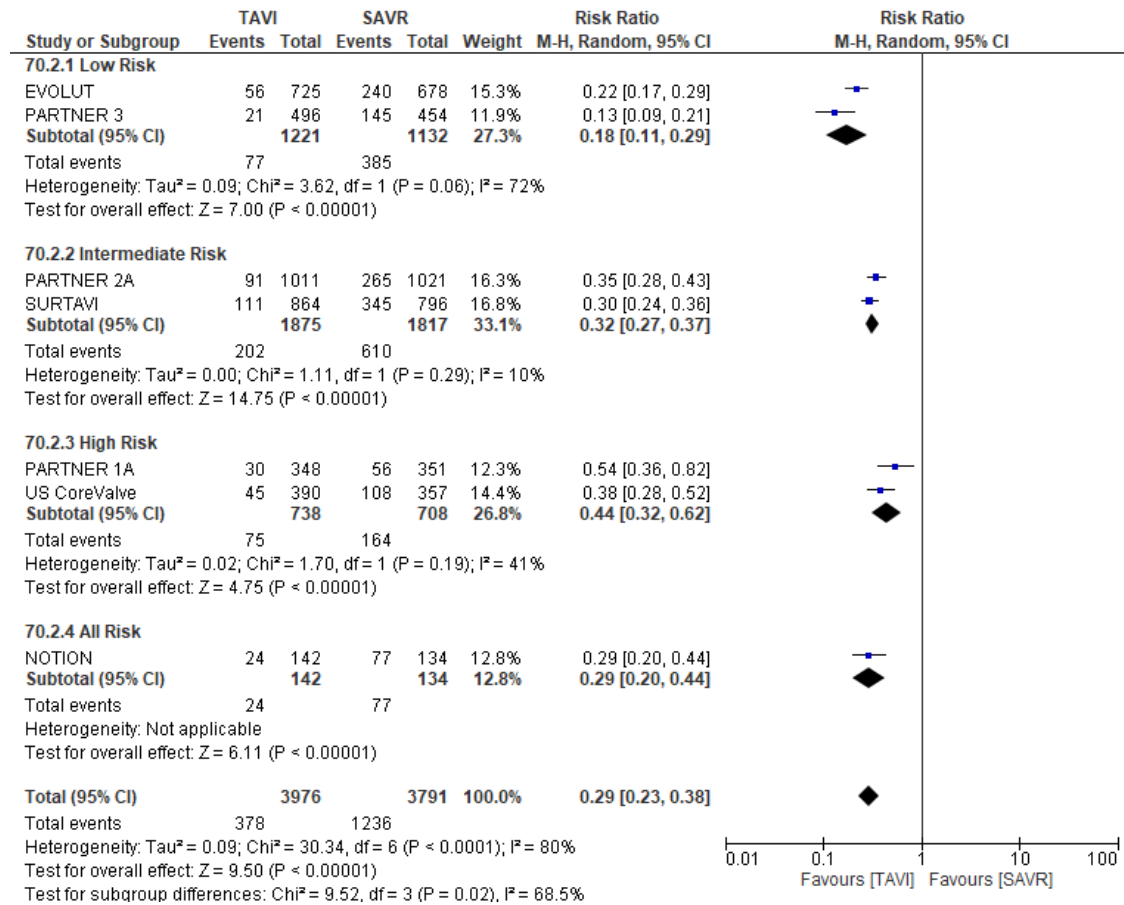

## c. 1 Year

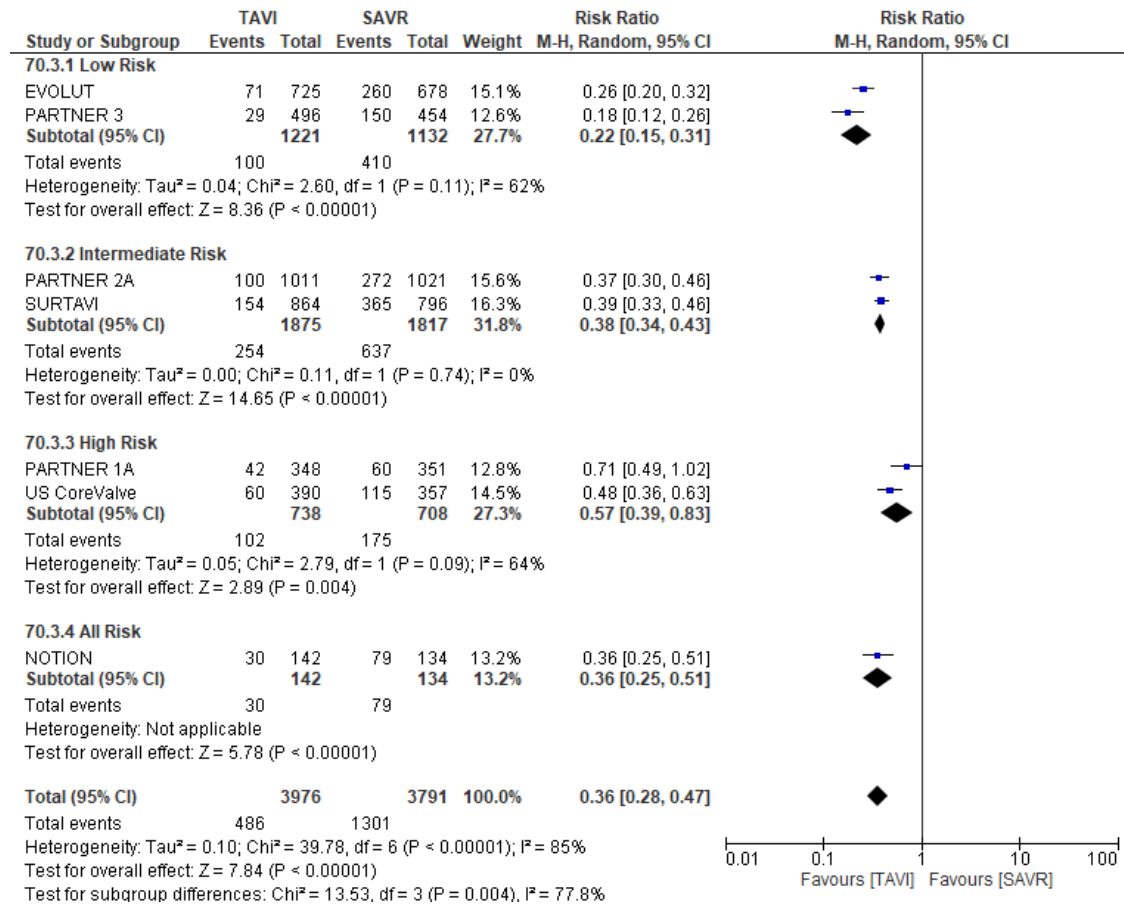

**d. 2 Years**

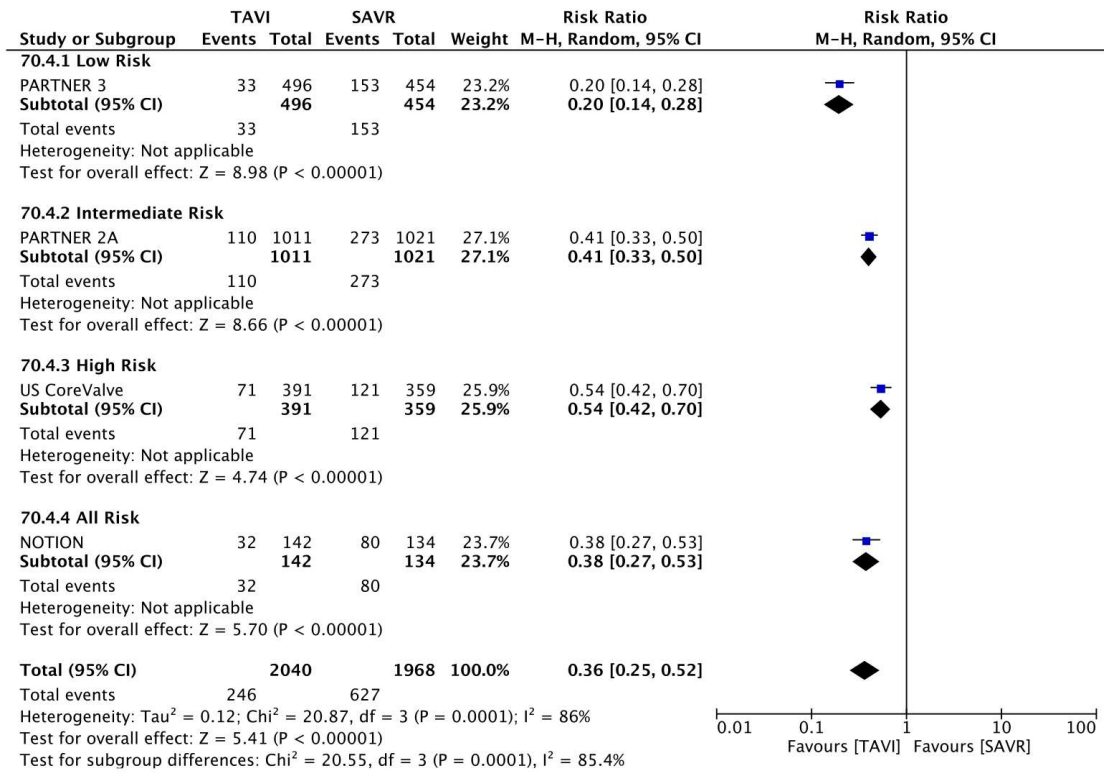

**e. 5 Years**

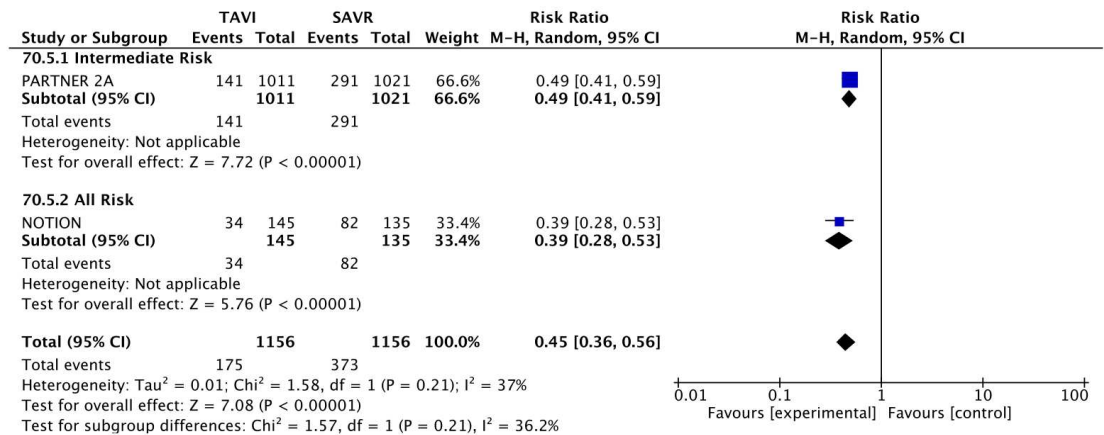



## SUPPLEMENTARY FIGURE S9: FOREST PLOTS FOR ENDOCARDITIS

## a. 30 Days

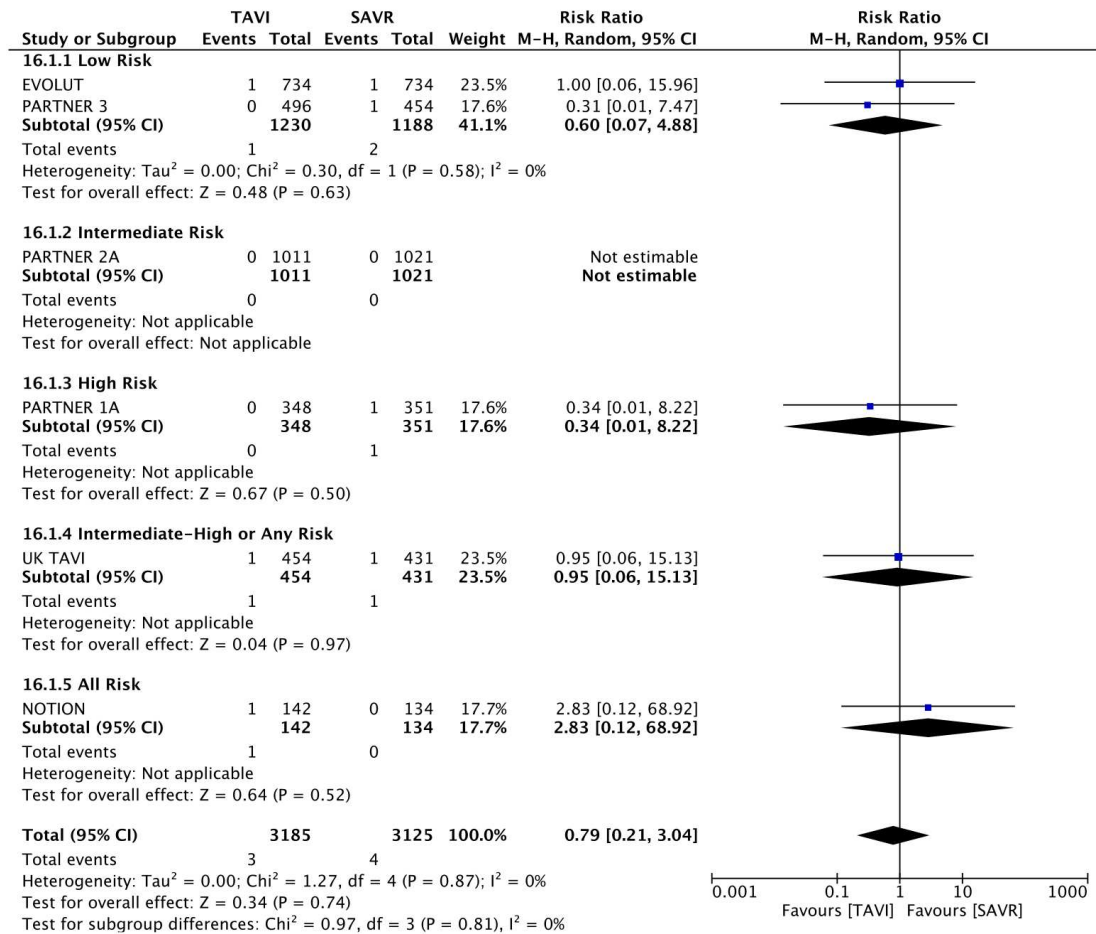

## b. 1 Year

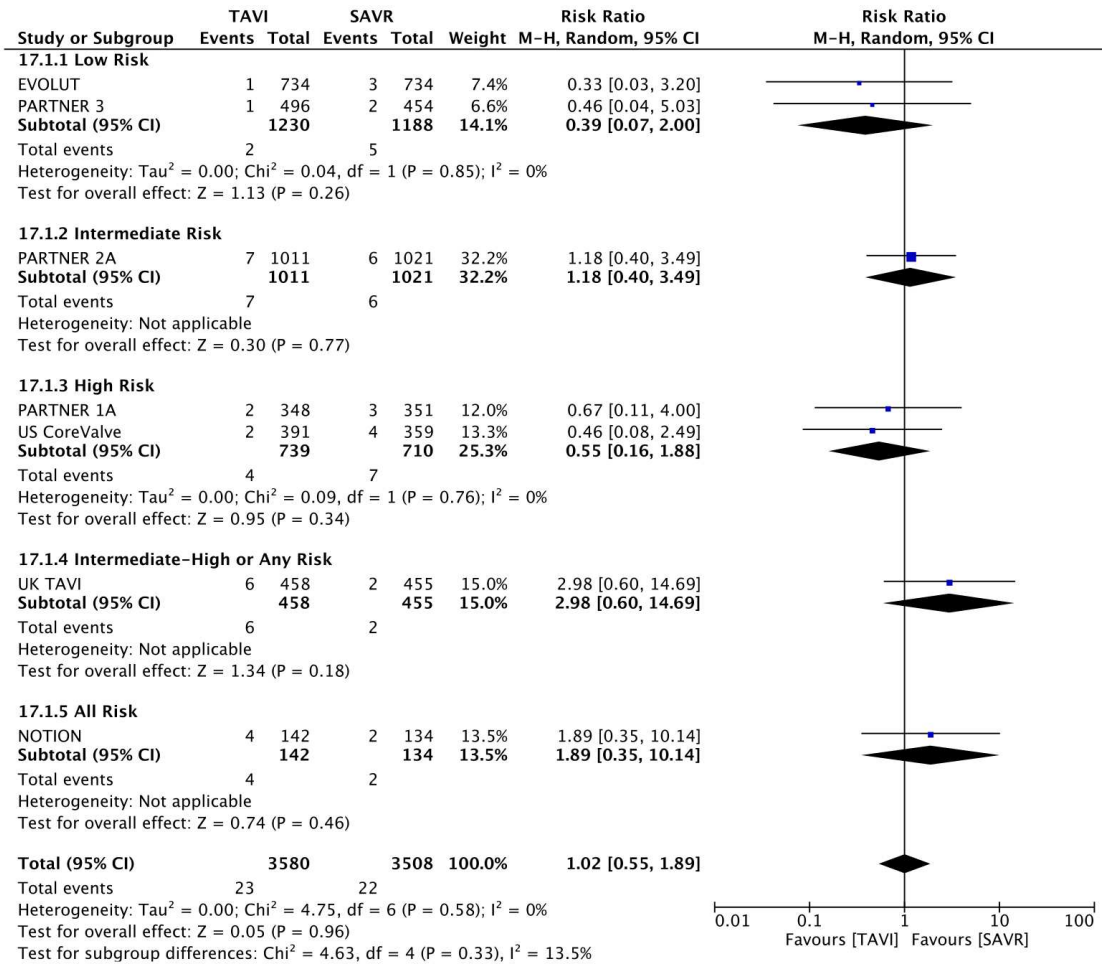

**c. 2 Years**

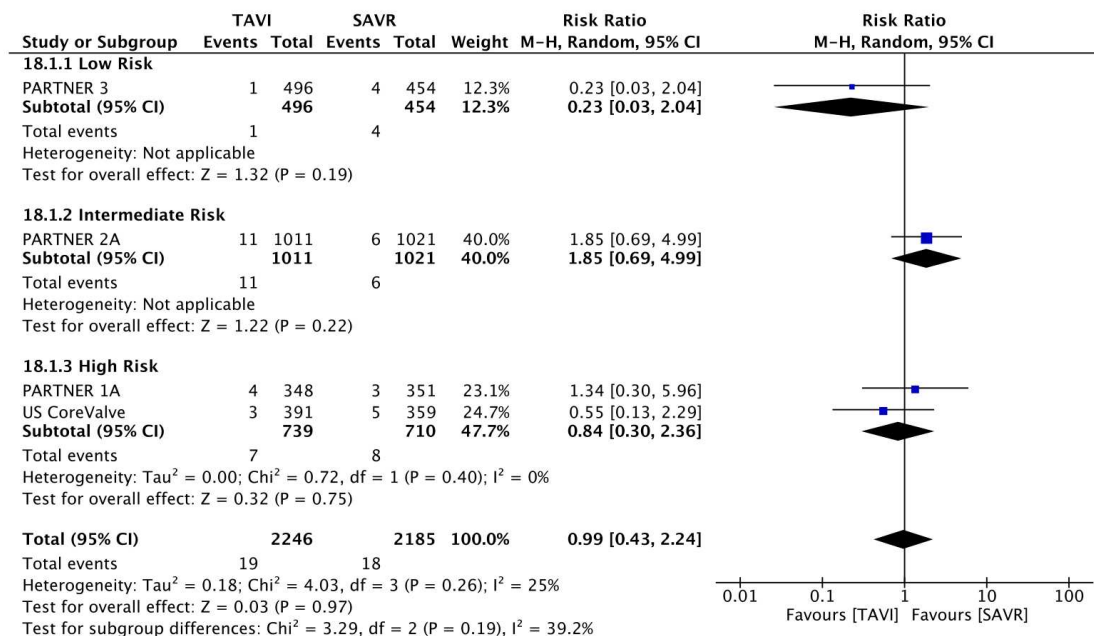

**d. 5 Years**

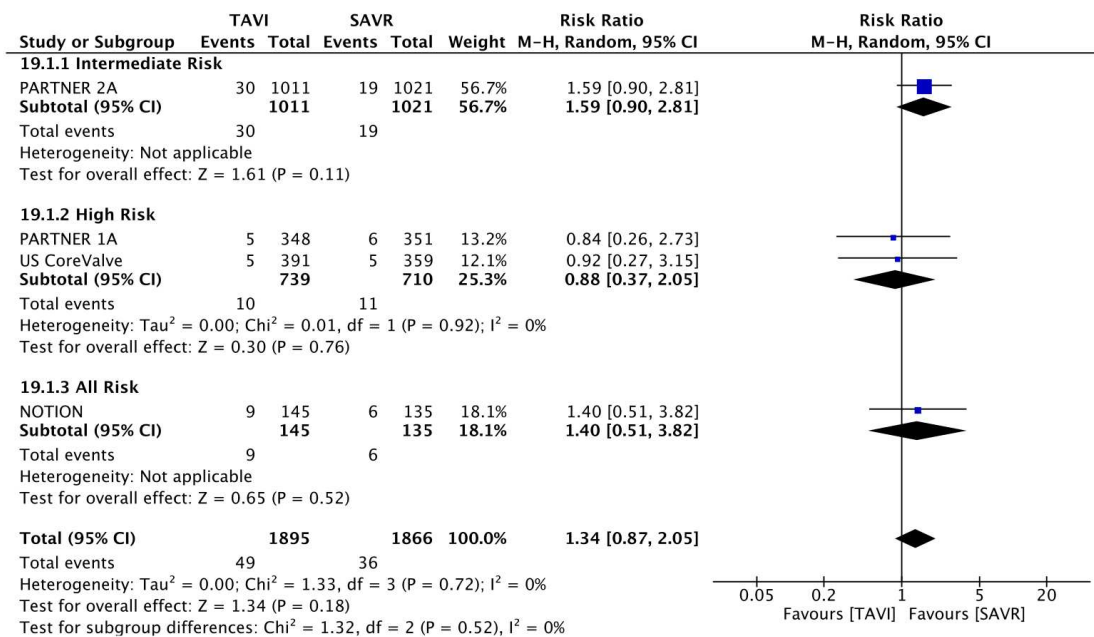

## SUPPLEMENTARY FIGURE S10: FOREST PLOTS FOR REINTERVENTION OR REOPERATION

### a. Periprocedural

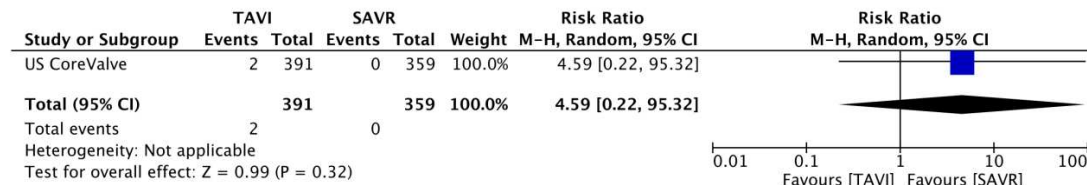

### b. 30 Days

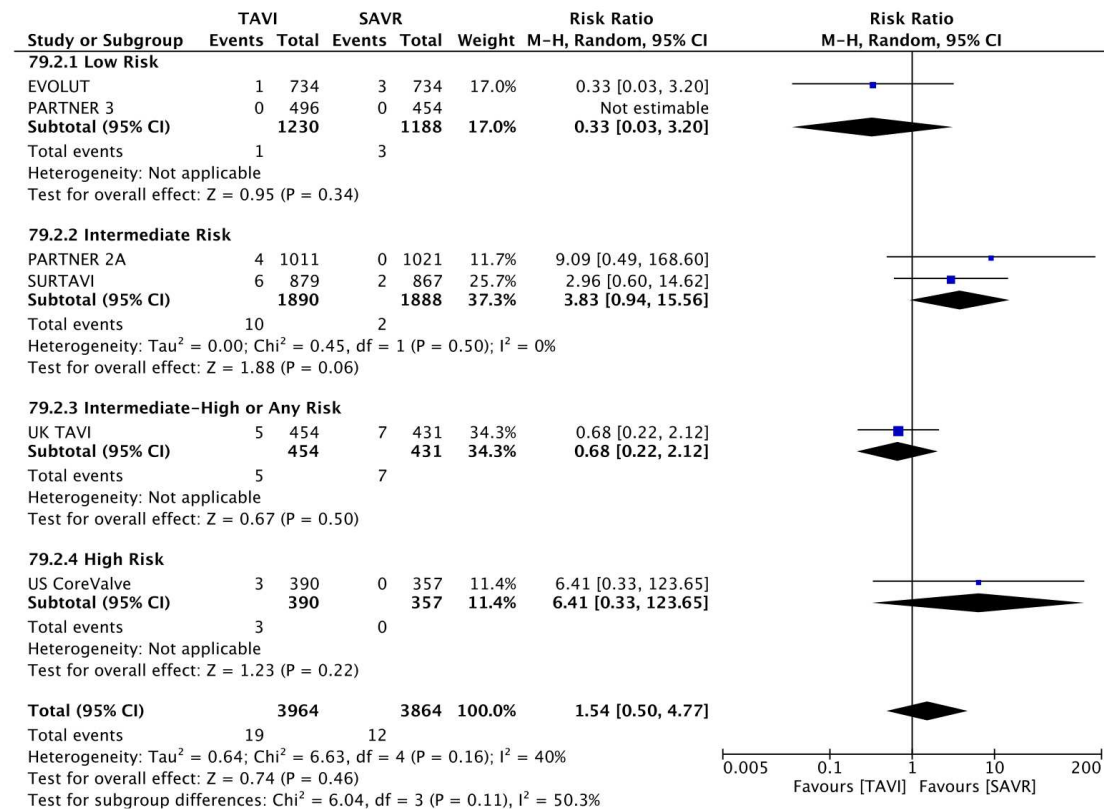

## c. 1 Year

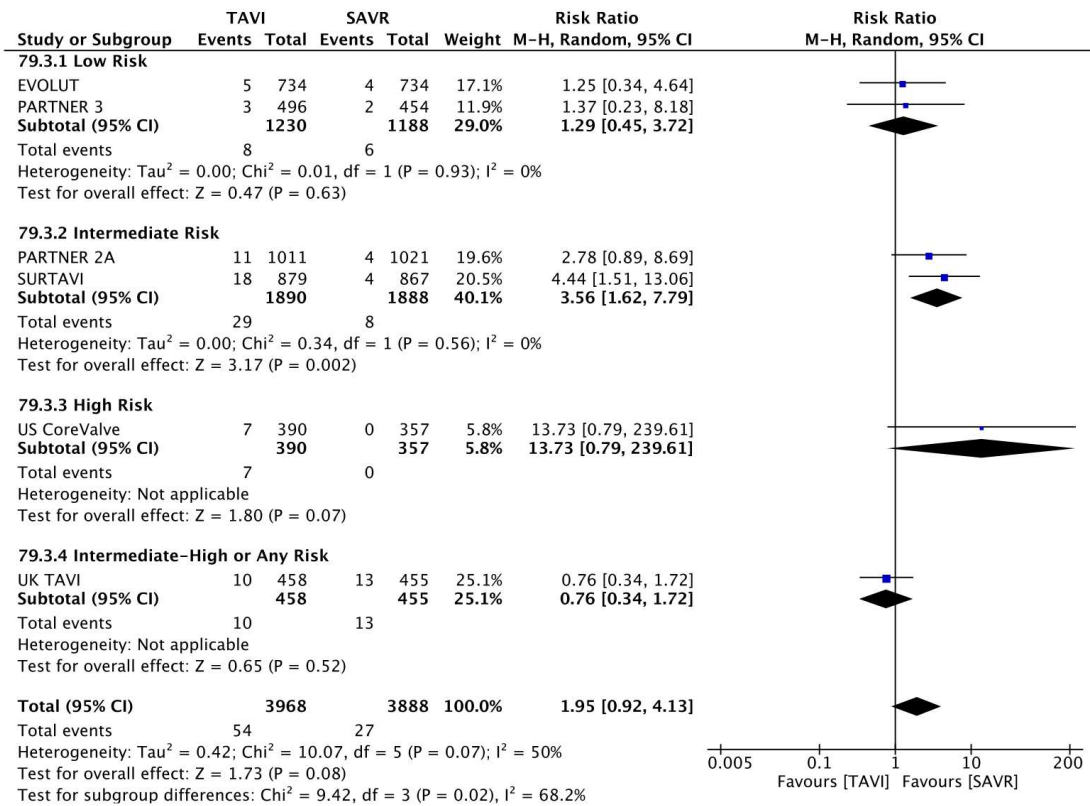

## d. 2 Years

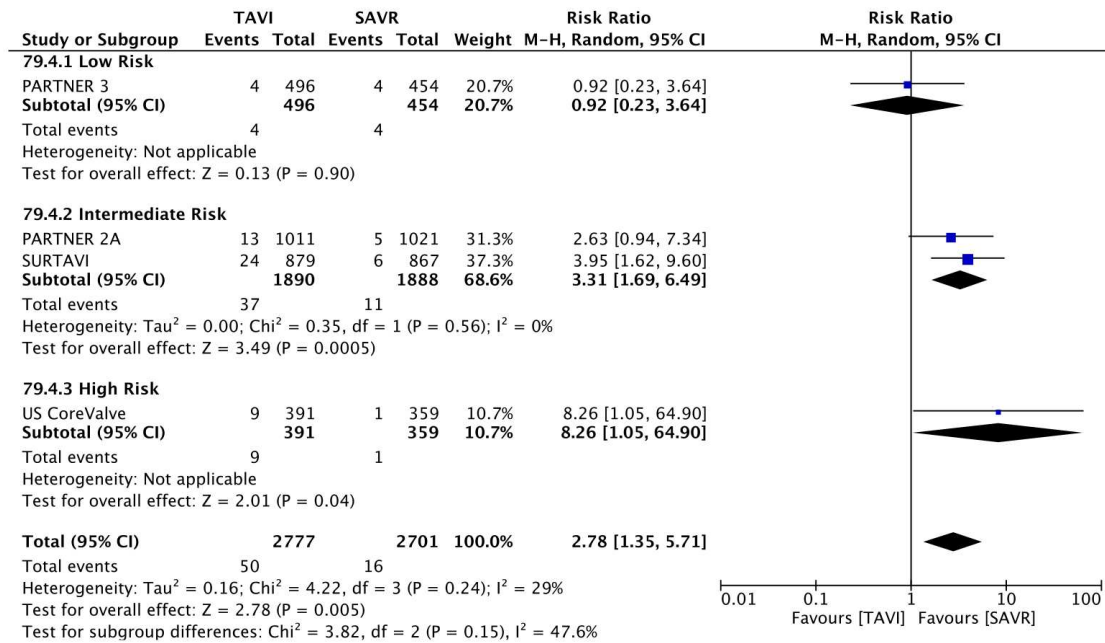

## e. 5 Years

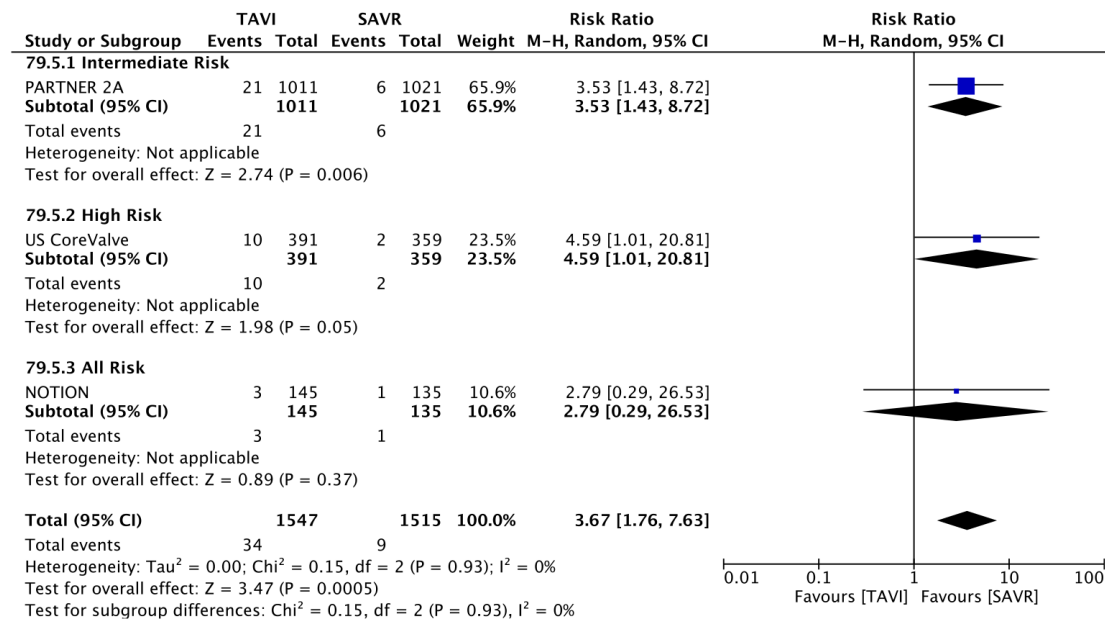

## SUPPLEMENTARY FIGURE S11: FOREST PLOTS FOR REHOSPITALISATION

## a. 30 Days

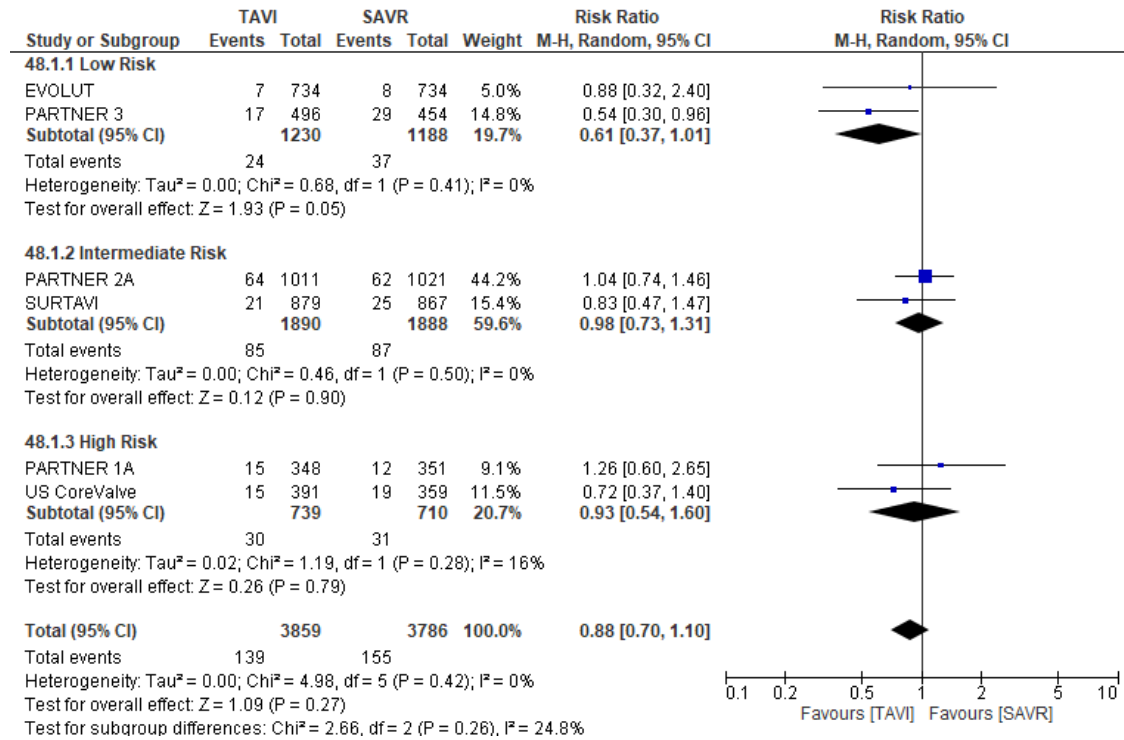

## b. 1 Year

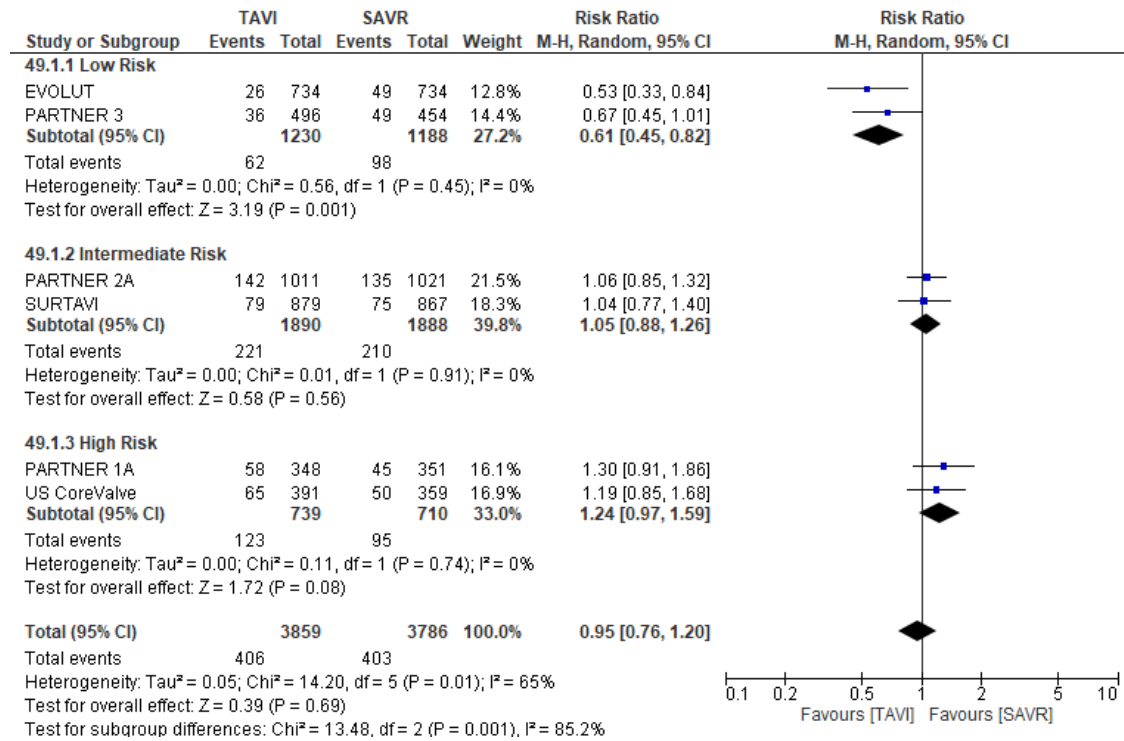



## c. 2 Years

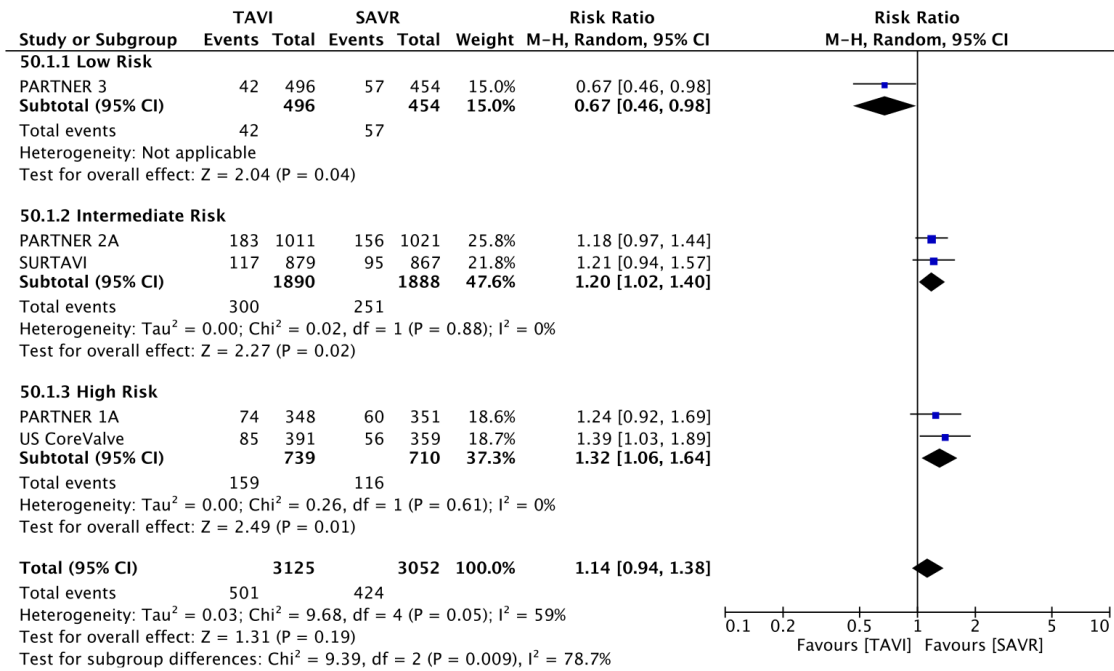

## d. 5 Years

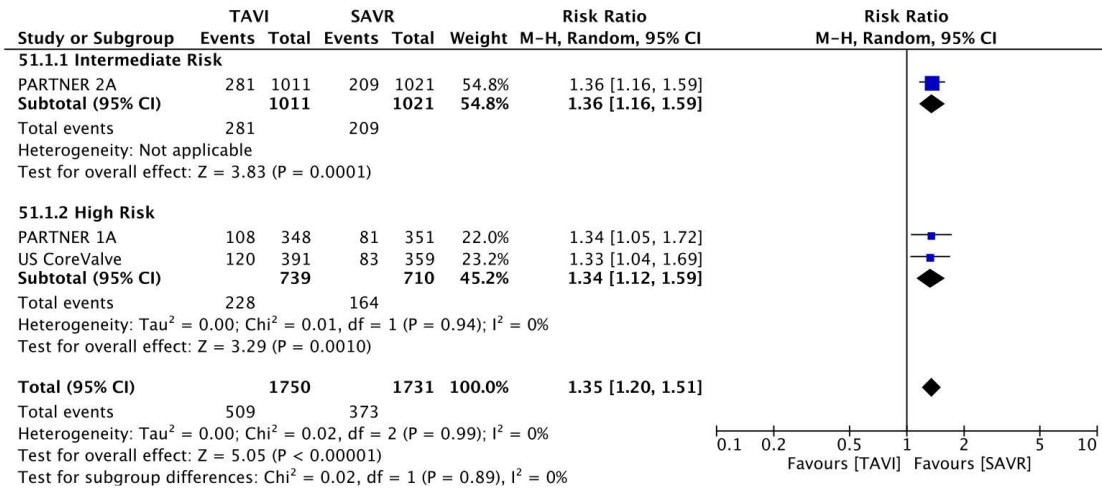

## SUPPLEMENTARY FIGURE S12: FOREST PLOTS FOR MEAN LENGTH OF HOSPITAL STAY

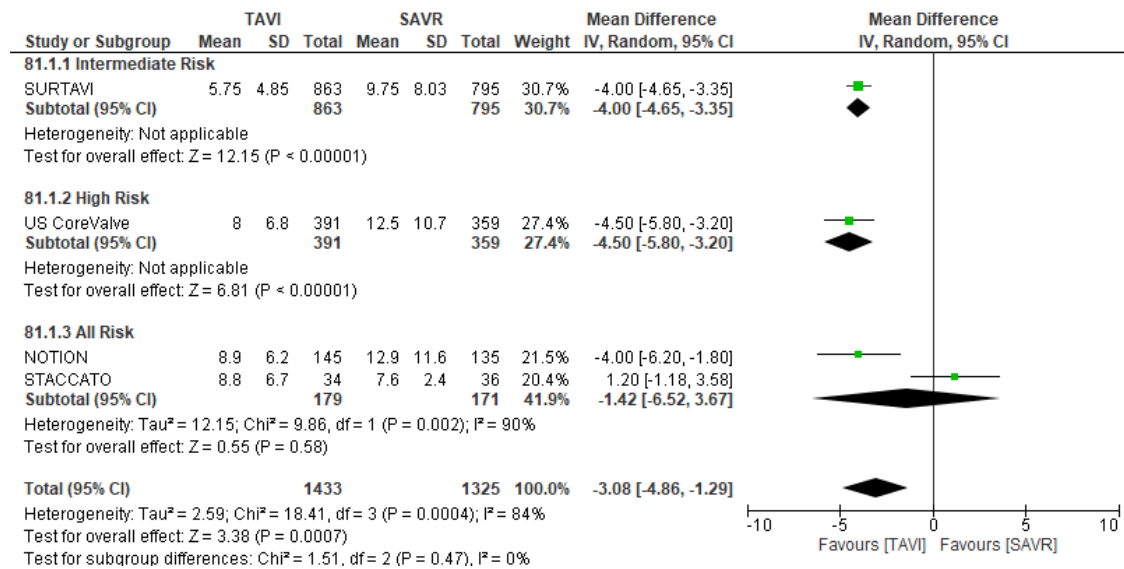

**SUPPLEMENTARY APPENDIX S1: SEARCH STRATEGY****Embase (Ovid): 1974-2020/08/05****Searched 6.8.20**

- 1 transcatheter aortic valve implantation/ (21568)
- 2 (TAVI or TAVR or PAVR or ViV-TAVI or VIVTAVI or "ViV TAVI").ti,ab,ot. (16298)
- 3 ((implant\$ or replac\$) adj3 (aortic or aorta or aortae) adj3 (valve\$ or valva or cusp or valvular)).ti,ab,ot. (38029)
- 4 ((aortic or aorta or aortae) adj3 (valve\$ or valva or cusp or valvular) adj3 (implant\$ or replac\$)).ti,ab,ot. (38790)
- 5 (("valve in valve" or "valve-in-valve") adj3 (aortic or aorta or aortae)).ti,ab,ot. (467)
- 6 or/1-5 (44351)
- 7 crossover-procedure/ or double-blind procedure/ or randomized controlled trial/ or single-blind procedure/ (686556)
- 8 (random\$ or factorial\$ or crossover\$ or cross over\$ or cross-over\$ or placebo\$ or (doubl\$ adj blind\$) or (singl\$ adj blind\$) or assign\$ or allocat\$ or volunteer\$).ti,ab,ot. (2260655)
- 9 or/7-8 (2360211)
- 10 animal/ or animal experiment/ (4013567)
- 11 (rat or rats or mouse or mice or murine or rodent or rodents or hamster or hamsters or pig or pigs or porcine or rabbit or rabbits or animal or animals or dogs or dog or cats or cow or bovine or sheep or ovine or monkey or monkeys).ti,ab,ot,hw. (6782516)
- 12 or/10-11 (6782516)
- 13 exp human/ or human experiment/ (21200909)
- 14 12 not (12 and 13) (5203614)
- 15 9 not 14 (2115522)
- 16 6 and 15 (2829)
- 17 **limit 16 to yr="2000 -Current" (2700)**

**Trials filter based on terms suggested by the Cochrane Handbook:**

Lefebvre C, Manheimer E, Glanville J. Chapter 6: searching for studies. 6.3.2.2. What is in The Cochrane Central Register of Controlled Trials (CENTRAL) from EMBASE? In: Higgins JPT, Green S (editors). *Cochrane Handbook for Systematic Reviews of Interventions* Version 5.1.0 [updated March 2011]. The Cochrane Collaboration, 2011. Available from [www.cochrane-handbook.org](http://www.cochrane-handbook.org)<sup>10</sup>

**Medline & In-Process Citations (Ovid): 1946-2020/08/04****Searched 6.8.20**

- 1 Transcatheter Aortic Valve Replacement/ (5612)
- 2 (TAVI or TAVR or PAVR or ViV-TAVI or VIVTAVI or "ViV TAVI").ti,ab,ot. (6737)
- 3 ((implant\$ or replac\$) adj3 (aortic or aorta or aortae) adj3 (valve\$ or valva or cusp or valvular)).ti,ab,ot. (23151)
- 4 ((aortic or aorta or aortae) adj3 (valve\$ or valva or cusp or valvular) adj3 (implant\$ or replac\$)).ti,ab,ot. (23701)
- 5 (("valve in valve" or "valve-in-valve") adj3 (aortic or aorta or aortae)).ti,ab,ot. (287)
- 6 or/1-5 (25309)
- 7 randomized controlled trial.pt. or "randomized controlled trials as topic"/ (639320)
- 8 controlled clinical trial.pt. (93772)
- 9 random\$.ti,ot. (223430)
- 10 placebo.ab. (206592)
- 11 random\$.ab. (1092052)

- 12 trial.ab. (502818)
- 13 groups.ab. (2036666)
- 14 or/7-13 (3219382)
- 15 exp animals/ not (exp animals/ and humans/) (4720549)
- 16 14 not 15 (2751689)
- 17 6 and 16 (4584)
- 18 **limit 17 to yr="2000 -Current" (4016)**

**Based on Trials filter:**

Lefebvre C, Manheimer E, Glanville J. Chapter 6: searching for studies. Box 6.4.c: Cochrane Highly sensitive search strategy for identifying randomized controlled trials in Medline: Sensitivity-maximizing version (2008 version); OVID format. In: Higgins JPT, Green S (editors). Cochrane Handbook for Systematic Reviews of Interventions Version 5.1.0 [updated March 2011]. The Cochrane Collaboration, 2011. Available from [www.cochrane-handbook.org](http://www.cochrane-handbook.org)<sup>10</sup>

**Medline Epub Ahead of Print & Daily Update (Ovid): up to 2020/08/04****Searched 6.8.20**

- 1 Transcatheter Aortic Valve Replacement/ (45)
- 2 (TAVI or TAVR or PAVR or ViV-TAVI or VIVTAVI or "ViV TAVI").ti,ab,ot. (399)
- 3 ((implant\$ or replac\$) adj3 (aortic or aorta or aortae) adj3 (valve\$ or valva or cusp or valvular)).ti,ab,ot. (724)
- 4 ((aortic or aorta or aortae) adj3 (valve\$ or valva or cusp or valvular) adj3 (implant\$ or replac\$)).ti,ab,ot. (732)
- 5 (("valve in valve" or "valve-in-valve") adj3 (aortic or aorta or aortae)).ti,ab,ot. (17)
- 6 or/1-5 (795)
- 7 randomized controlled trial.pt. or "randomized controlled trials as topic"/ (965)
- 8 controlled clinical trial.pt. (13)
- 9 random\$.ti,ot. (6823)
- 10 placebo.ab. (3385)
- 11 random\$.ab. (24421)
- 12 trial.ab. (12305)
- 13 groups.ab. (40640)
- 14 or/7-13 (63981)
- 15 exp animals/ not (exp animals/ and humans/) (2684)
- 16 14 not 15 (63582)
- 17 6 and 16 (190)
- 18 **limit 17 to yr="2000 -Current" (186)**

**Based on Trials filter:**

Lefebvre C, Manheimer E, Glanville J. Chapter 6: searching for studies. Box 6.4.c: Cochrane Highly sensitive search strategy for identifying randomized controlled trials in Medline: Sensitivity-maximizing version (2008 version); OVID format. In: Higgins JPT, Green S (editors). Cochrane Handbook for Systematic Reviews of Interventions Version 5.1.0 [updated March 2011]. The Cochrane Collaboration, 2011. Available from [www.cochrane-handbook.org](http://www.cochrane-handbook.org)<sup>10</sup>

**Cochrane Central Register of Controlled Trials (CENTRAL) (Wiley): Issue 8/12, August 2020****Date limit: 2019/05-2020/08****Searched 6.8.20**

- #1 MeSH descriptor: [Transcatheter Aortic Valve Replacement] this term only 146
- #2 (TAVI or TAVR or PAVR or ViV-TAVI or VIVTAVI or "ViV TAVI"):ti,ab 742

- #3 ((implant\* or replac\*) NEAR/3 (aortic or aorta or aortae) NEAR/3 (valve\* or valva or cusp or valvular)):ti,ab 1490
- #4 ((aortic or aorta or aortae) NEAR/3 (valve\* or valva or cusp or valvular) NEAR/3 (implant\* or replac\*)):ti,ab 1510
- #5 ("valve in valve" or "valve-in-valve") NEAR/3 (aortic or aorta or aortae)):ti,ab 6
- #6 #1 or #2 or #3 or #4 or #5 with Cochrane Library publication date Between Jan 2000 and Aug 2020, in Trials 1517**

**SUPPLEMENTARY REFERENCE LIST**

- [1] Popma JJ, Deeb GM, Yakubov SJ, et al. Transcatheter aortic-valve replacement with a self-expanding valve in low-risk patients. *N Engl J Med* 2019;380(18):1706-15. doi: <https://dx.doi.org/10.1056/NEJMoa1816885>
- [2] Smith CR, Leon MB, Mack MJ, et al. Transcatheter versus surgical aortic-valve replacement in high-risk patients. *N Engl J Med* 2011;364(23):2187-98. doi: <https://dx.doi.org/10.1056/NEJMoa1103510>
- [3] Leon MB, Smith CR, Mack MJ, et al. Transcatheter or surgical aortic-valve replacement in intermediate-risk patients. *N Engl J Med* 2016;374(17):1609-20. doi: <https://dx.doi.org/10.1056/NEJMoa1514616>
- [4] Mack MJ, Leon MB, Thourani VH, et al. Transcatheter aortic-valve replacement with a balloon-expandable valve in low-risk patients. *N Engl J Med* 2019;380(18):1695-705. doi: <https://dx.doi.org/10.1056/NEJMoa1814052>
- [5] Nielsen HH, Klaaborg KE, Nissen H, et al. A prospective, randomised trial of transapical transcatheter aortic valve implantation vs. surgical aortic valve replacement in operable elderly patients with aortic stenosis: the STACCATO trial. *EuroIntervention* 2012;8(3):383-9. doi: <https://dx.doi.org/10.4244/EIJV8I3A58>
- [6] Reardon MJ, Van Mieghem NM, Popma JJ, et al. Surgical or transcatheter aortic-valve replacement in intermediate-risk patients. *N Engl J Med* 2017;376(14):1321-31. doi: <https://dx.doi.org/10.1056/NEJMoa1700456>
- [7] Adams DH, Popma JJ, Reardon MJ, et al. Transcatheter aortic-valve replacement with a self-expanding prosthesis. *N Engl J Med* 2014;370(19):1790-8. doi: <https://dx.doi.org/10.1056/NEJMoa1400590>
- [8] Thyregod HG, Steinbruchel DA, Ihlemann N, et al. Transcatheter versus surgical aortic valve replacement in patients with severe aortic valve stenosis: 1-year results from the All-Comers NOTION randomized clinical trial. *J Am Coll Cardiol* 2015;65(20):2184-94. doi: <https://dx.doi.org/10.1016/j.jacc.2015.03.014>
- [9] Toff WD. United Kingdom Transcatheter Aortic Valve Implantation - UK TAVI. Presented at ACC 2020 (World Congress of Cardiology); 28-30 March 2020; Chicago, IL [Internet] Washington, DC: American College of Cardiology; 2020 [accessed 14.8.20] [Available from: <https://www.acc.org/latest-in-cardiology/clinical-trials/2020/03/26/21/14/uk-tavi>].
- [10] Lefebvre C, Manheimer E, Glanville J. Chapter 6: searching for studies. 6.3.2.2. What is in The Cochrane Central Register of Controlled Trials (CENTRAL) from EMBASE? . In: Higgins J, Green S, eds. *Cochrane Handbook for Systematic Reviews of Interventions* Version 510 [updated March 2011]; Cochrane Collaboration 2011.
